# Supplementary material for: Multi-Approach Analysis Reveals Pathways of Cold Tolerance Divergence in Camellia japonica
Source: Front Plant Sci. 2022 Feb 25;13:811791. doi: 10.3389/fpls.2022.811791 (PMC8914472; doi:10.3389/fpls.2022.811791)
Supplement: Supplementary Table 1 — The raw data of physiology index. [file Table_1.XLSX]

## Sheet: Sheet1
CAT activity	repliction	Sg C. japonica	Tg C. japonica			Relative electric conductivity	repliction	Sg C. japonica	Tg C. japonica			MDA content	repliction	Sg C. japonica	Tg C. japonica
0h	1	160.31	172.26			0h	1	0.2137	0.2266			0h	1	24.11	20.33
	2	166.35	165.89				2	0.2	0.2244				2	22.34	21.15
	3	186.67	167.96				3	0.2193	0.2138				3	22.59	17.41
1h	1	192.667	166.667			1h	1	0.316547	0.253521			1h	1	30.7263	22.4157
	2	233.333	206.667				2	0.313433	0.25				2	31.6183	18.719
	3	180.667	186.667				3	0.293651	0.252747				3	30.3734	22.2824
2h	1	185	233.333			2h	1	0.318182	0.248555			2h	1	27.4485	26.0494
	2	190	235				2	0.324841	0.255319				2	28.309	29.4299
	3	165	241.667				3	0.32	0.248366				3	30.2249	30.1968
3h	1	171.33	240			3h	1	0.523077	0.320988			3h	1	27.666	25.5224
	2	152.67	196.667				2	0.511111	0.320261				2	27.3564	25.77
	3	142.68	216.667				3	0.512195	0.323171				3	37.7964	28.592
4h	1	125.33	293.333			4h	1	0.373984	0.282051			4h	1	27.3244	25.9372
	2	130.66	286.667				2	0.412162	0.278049				2	27.4385	28.6023
	3	121.33	306.667				3	0.384615	0.27957				3	28.9504	27.5495
5h	1	110.33	393.333			5h	1	0.435065	0.303867			5h	1	39.5833	20.9122
	2	93.3333	370.333				2	0.445161	0.32				2	39.7759	29.9015
	3	123.01	356.333				3	0.448718	0.343023				3	36.1784	29.0551
6h	1	105.33	386.667			6h	1	0.465909	0.322917			6h	1	42.4719	32.5139
	2	103.33	370				2	0.464481	0.344828				2	39.5184	33.8113
	3	99.66	363.333				3	0.446328	0.341176				3	40.0811	32.1127
7h	1	113.33	436			7h	1	0.484375	0.47449			7h	1	48.4157	43.8241
	2	93.3333	420				2	0.461538	0.504808				2	44.2325	39.1549
	3	73.33	450.667				3	0.484211	0.487179				3	46.32	46.5739
8h	1	146.33	406.667			8h	1	0.5125	0.457317			8h	1	54.6285	36.3873
	2	138.99	420				2	0.465278	0.481013				2	53.8937	35.507
	3	140	396.667				3	0.527607	0.467532				3	54.7526	37.7096
12h	1	93.3333	193.333			12h	1	0.511628	0.453988			12h	1	20.0457	29.8971
	2	88.33	163.333				2	0.537975	0.473684				2	16.8149	28.9303
	3	103.03	170				3	0.526627	0.486842				3	16.4958	32.6334
24h	1	81.33	123.333			24h	1	0.583333	0.562162			24h	1	11.9734	16.4222
	2	94.33	113.333				2	0.582418	0.6				2	13.3569	12.894
	3	90.62	136.667				3	0.602041	0.589888				3	11.678	19.6302
Relative electric conductivity rate	repliction	Sg C. japonica	Tg C. japonica			MDA content rate	repliction	Sg C. japonica	Tg C. japonica			CAT activity rate	repliction	Sg C. japonica	Tg C. japonica
2h	1	0.104482	0.0318873			2h	1	3.33854	5.71944			2h	1	24.69	61.0733
	2	0.124841	0.0309191				2	5.96903	8.27989				2	23.65	69.11
	3	0.1007	0.0433285				3	7.63486	12.7868				3	21.67	73.7067
4h	1	0.353988	0.111369			4h	1	0.1241	0.1122			4h	1	59.67	60
	2	0.285219	0.107155				2	0.87056	0.82756				2	59.34	51.6667
	3	0.319775	0.118406				3	1.2745	2.64724				3	43.67	65
6h	1	0.0919254	0.0408654			6h	1	15.1475	6.57662			6h	1	20	93.3333
	2	0.0523187	0.0667788				2	12.08	5.20897				2	27.33	83.3333
	3	0.0664928	0.0653001				3	11.1307	4.56314				3	21.67	56.6667
8h	1	0.0465909	0.168746			8h	1	12.1565	3.87345			8h	1	41	20
	2	0.00668173	0.183775				2	14.3753	1.69575				2	35.66	50
	3	0.0812797	0.16565				3	14.6715	5.59695				3	40.34	33.3333
12h	1	0.000436047	0.00166467			12h	1	17.2914	3.24513			12h	1	26.4983	106.667
	2	0.0363485	0.00366422				2	18.5394	3.28839				2	25.33	128.333
	3	0.000490072	0.00965482				3	19.1284	2.53812				3	18.485	113.333
24h	1	0.00597545	0.00901454			24h	1	1.34538	2.24581			24h	1	2.00056	11.6667
	2	0.00370357	0.0105263				2	0.576328	2.67271				2	1	8.33333
	3	0.00628447	0.00858713				3	0.802967	2.16719				3	2.06833	5.55556
