# Supplementary material for: Multi-Approach Analysis Reveals Pathways of Cold Tolerance Divergence in Camellia japonica
Source: Front Plant Sci. 2022 Feb 25;13:811791. doi: 10.3389/fpls.2022.811791 (PMC8914472; doi:10.3389/fpls.2022.811791)
Supplement: Supplementary Table 2 — The sequence data of transcriptomics and proteomics. [file Table_2.XLSX]

## Sheet: Sheet1
transcriptome accession	Read Number	Base Number	GC Content	%≥Q30				Pearson's correlation of quantitation
Sg-4h1	31549304	9316501216	0.4646	0.8594					Tg-CK.Exp.1	Tg-CK.Exp.2	Tg-CK.Exp.3	Tg-8h.Exp.1	Tg-8h.Exp.2	Tg-8h.Exp.3	Sg-CK.Exp.1	Sg-CK.Exp.2	Sg-CK.Exp.3	Sg-8h.Exp.1	Sg-8h.Exp.2	Sg-8h.Exp.3
Sg-4h2	22666236	6663684482	0.4609	0.8636				Tg-CK.Exp.1	1	0.8	0.85	0.54	0.46	0.51	-0.61	-0.55	-0.56	-0.55	-0.45	-0.47
Sg-4h3	31731765	9344262998	0.4661	0.8625				Tg-CK.Exp.2	0.8	1	0.83	0.46	0.5	0.5	-0.55	-0.6	-0.57	-0.51	-0.61	-0.54
Tg-4h1	24745545	7288064758	0.4722	0.8657				Tg-CK.Exp.3	0.85	0.83	1	0.53	0.48	0.52	-0.52	-0.54	-0.58	-0.53	-0.52	-0.6
Tg-4h2	20404743	5995165138	0.4717	0.8684				Tg-8h.Exp.1	0.54	0.46	0.53	1	0.82	0.87	-0.62	-0.58	-0.57	-0.54	-0.46	-0.5
Tg-4h3	24882043	7298057242	0.4609	0.8706				Tg-8h.Exp.2	0.46	0.5	0.48	0.82	1	0.86	-0.57	-0.65	-0.6	-0.47	-0.6	-0.53
Sg-8h1	20705620	6100317752	0.4644	0.8507				Tg-8h.Exp.3	0.51	0.5	0.52	0.87	0.86	1	-0.56	-0.58	-0.61	-0.52	-0.52	-0.59
Sg-8h2	25777405	7592477428	0.4654	0.8502				Sg-CK.Exp.1	-0.61	-0.55	-0.52	-0.62	-0.57	-0.56	1	0.84	0.87	0.35	0.35	0.3
Sg-8h3	25663835	7575647770	0.465	0.851				Sg-CK.Exp.2	-0.55	-0.6	-0.54	-0.58	-0.65	-0.58	0.84	1	0.87	0.3	0.4	0.32
Tg-8h1	21649326	6373407484	0.4745	0.8509				Sg-CK.Exp.3	-0.56	-0.57	-0.58	-0.57	-0.6	-0.61	0.87	0.87	1	0.33	0.39	0.36
Tg-8h2	21805485	6416680748	0.4727	0.8502				Sg-8h.Exp.1	-0.55	-0.51	-0.53	-0.54	-0.47	-0.52	0.35	0.3	0.33	1	0.85	0.87
Tg-8h3	22140516	6502780390	0.4715	0.8504				Sg-8h.Exp.2	-0.45	-0.61	-0.52	-0.46	-0.6	-0.52	0.35	0.4	0.39	0.85	1	0.84
Sg-24h1	25130259	7386879576	0.4709	0.8509				Sg-8h.Exp.3	-0.47	-0.54	-0.6	-0.5	-0.53	-0.59	0.3	0.32	0.36	0.87	0.84	1
Sg-24h2	22090518	6501661148	0.4705	0.8503
Sg-24h3	20718642	6112319586	0.4656	0.8502
Tg-24h1	23640889	6961270712	0.465	0.8509
Tg-24h2	24751061	7302068540	0.4756	0.8502
Tg-24h3	24127566	7115371338	0.4726	0.8506
Sg-CK1	20802120	6142474904	0.4514	0.8505
Sg-CK2	23908035	7016720906	0.4594	0.8501
Sg-CK3	22269611	6565361460	0.4525	0.8505
Tg-CK1	21162223	6245958392	0.4582	0.8604
Tg-CK2	23853119	7034338760	0.454	0.8586
Tg-CK3	24966835	7379041460	0.4487	0.8537
