# Supplementary material for: Multi-Approach Analysis Reveals Pathways of Cold Tolerance Divergence in Camellia japonica
Source: Front Plant Sci. 2022 Feb 25;13:811791. doi: 10.3389/fpls.2022.811791 (PMC8914472; doi:10.3389/fpls.2022.811791)
Supplement: Supplementary Table 3 — The enrichment KEGG pathways of Tg vs. Sg. [file Table_3.XLSX]

## Sheet: Sheet1
transcriptome
ID	Description	GeneRatio	BgRatio	enrich_factor	pvalue	Contained		ID	Description	GeneRatio	BgRatio	enrich_factor	pvalue	Contained
ko00195	Photosynthesis	0.1754	0.0087	20.14	4.66186e-21	up		ko04626	Plant-pathogen interaction	0.2627	0.0601	4.37	1.39487e-12	down
ko00196	Photosynthesis - antenna proteins	0.0789	0.0035	22.44	1.6442e-10	up		ko00902	Monoterpenoid biosynthesis	0.0254	0.0018	13.79	0.00126429	down
ko00630	Glyoxylate and dicarboxylate metabolism	0.0965	0.026	3.72	0.000180923	up		ko04075	Plant hormone signal transduction	0.0932	0.039	2.39	0.00626625	down
ko04626	Plant-pathogen interaction	0.1316	0.0601	2.19	0.00337351	up		ko00905	Brassinosteroid biosynthesis	0.0169	0.0018	9.63	0.0179995	down
ko00942	Anthocyanin biosynthesis	0.0088	0.0004	20.94	0.046855	up		ko00904	Diterpenoid biosynthesis	0.0169	0.0024	6.98	0.0330653	down
ko00910	Nitrogen metabolism	0.0263	0.0075	3.53	0.0533533	up		ko00942	Anthocyanin biosynthesis	0.0085	0.0004	20.23	0.0484665	down
ko00710	Carbon fixation in photosynthetic organisms	0.0439	0.018	2.44	0.0550251	up		ko00908	Zeatin biosynthesis	0.0169	0.0032	5.32	0.0540758	down
ko04146	Peroxisome	0.0526	0.0289	1.82	0.112486	up		ko00062	Fatty acid elongation	0.0169	0.0034	4.93	0.0618922	down
ko01200	Carbon metabolism	0.1053	0.0718	1.47	0.116489	up		ko00520	Amino sugar and nucleotide sugar metabolism	0.0508	0.0263	1.93	0.0910077	down
ko00944	Flavone and flavonol biosynthesis	0.0088	0.0014	6.16	0.150615	up		ko04120	Ubiquitin mediated proteolysis	0.0424	0.0229	1.85	0.133659	down
ko03030	DNA replication	0.0175	0.006	2.91	0.150647	up		ko00944	Flavone and flavonol biosynthesis	0.0085	0.0014	5.95	0.15549	down
ko00906	Carotenoid biosynthesis	0.0175	0.0062	2.83	0.157314	up		ko02010	ABC transporters	0.0254	0.0123	2.06	0.177948	down
ko02010	ABC transporters	0.0263	0.0123	2.14	0.165825	up		ko00943	Isoflavonoid biosynthesis	0.0085	0.0018	4.6	0.196478	down
ko00100	Steroid biosynthesis	0.0175	0.0072	2.44	0.198325	up		ko00480	Glutathione metabolism	0.0339	0.02	1.69	0.211458	down
ko00220	Arginine biosynthesis	0.0175	0.0073	2.41	0.201804	up		ko00500	Starch and sucrose metabolism	0.0508	0.0339	1.5	0.21188	down
ko00250	Alanine, aspartate and glutamate metabolism	0.0263	0.0137	1.93	0.204155	up		ko04144	Endocytosis	0.0508	0.0353	1.44	0.237428	down
ko00941	Flavonoid biosynthesis	0.0175	0.008	2.18	0.233385	up		ko00941	Flavonoid biosynthesis	0.0169	0.008	2.11	0.245292	down
ko04712	Circadian rhythm - plant	0.0175	0.0085	2.05	0.254612	up		ko04712	Circadian rhythm - plant	0.0169	0.0085	1.98	0.2673	down
ko00604	Glycosphingolipid biosynthesis - ganglio series	0.0088	0.0026	3.38	0.25759	up		ko00909	Sesquiterpenoid and triterpenoid biosynthesis	0.0085	0.0027	3.16	0.272628	down
ko00909	Sesquiterpenoid and triterpenoid biosynthesis	0.0088	0.0027	3.27	0.264698	up		ko00740	Riboflavin metabolism	0.0085	0.0033	2.59	0.321631	down
proteome
ID	Description	Mapping	Background	Fold enrichment	Fisher's exact test p value	Contained		ID	Description	Mapping	Background	Fold enrichment	Fisher's exact test p value	Contained
ath03010	Ribosome	61	139	7.95	2.25038e-46	up		ath00480	Glutathione metabolism	7	75	4.86	0.000424612	down
ath04141	Protein processing in endoplasmic reticulum	14	120	2.11	0.00509823	up		ath01110	Biosynthesis of secondary metabolites	20	629	1.66	0.00630785	down
								ath00010	Glycolysis / Gluconeogenesis	6	101	3.09	0.0112205	down
								ath00565	Ether lipid metabolism	2	9	11.57	0.0118893	down
								ath00410	beta-Alanine metabolism	3	30	5.21	0.0186054	down
								ath00906	Carotenoid biosynthesis	2	13	8.01	0.0245408	down
								ath00640	Propanoate metabolism	3	39	4.01	0.0371937	down
								ath00940	Phenylpropanoid biosynthesis	3	43	3.63	0.0476555	down
								ath00280	Valine, leucine and isoleucine degradation	3	43	3.63	0.0476555	down
