# Supplementary material for: Multi-Approach Analysis Reveals Pathways of Cold Tolerance Divergence in Camellia japonica
Source: Front Plant Sci. 2022 Feb 25;13:811791. doi: 10.3389/fpls.2022.811791 (PMC8914472; doi:10.3389/fpls.2022.811791)
Supplement: Supplementary Table 4 — The enrichment GO terms of Tg vs. Sg. [file Table_4.XLSX]

## Sheet: Sheet1
Upregulated genes in Tg C. japonica
Biological Process	Description	GeneRatio	BgRatio	enrich_factor	pvalue	qvalue		Cellular Component	Description	GeneRatio	BgRatio	enrich_factor	pvalue	qvalue		Molecular Function	Description	GeneRatio	BgRatio	enrich_factor	pvalue	qvalue
GO:0015979	photosynthesis	0.1282	0.0065	19.87	7.27647e-16	2.56591e-13		GO:0009522	photosystem I	0.0968	0.003	31.81	1.65191e-15	1.19981e-13		GO:0016168	chlorophyll binding	0.0484	0.0019	25.45	6.13794e-11	8.33468e-09
GO:0015074	DNA integration	0.1282	0.0143	9	1.03534e-10	1.82547e-08		GO:0009523	photosystem II	0.0968	0.0033	29.27	5.01418e-15	1.82094e-13		GO:0003676	nucleic acid binding	0.1613	0.0617	2.61	1.25937e-06	8.55046e-05
GO:0018298	protein-chromophore linkage	0.0769	0.0035	22.29	1.89892e-10	2.23207e-08		GO:0009535	chloroplast thylakoid membrane	0.1048	0.0079	13.32	1.50106e-11	3.63414e-10		GO:0004523	RNA-DNA hybrid ribonuclease activity	0.0484	0.0087	5.54	3.92702e-05	0.00177749
GO:0009765	photosynthesis, light harvesting	0.0513	0.0027	18.99	6.31181e-07	5.56435e-05		GO:0009654	photosystem II oxygen evolving complex	0.0403	0.0021	19.05	5.76768e-06	0.000104729		GO:0005262	calcium channel activity	0.0161	0.0007	23.76	0.000247935	0.00841675
GO:0009768	photosynthesis, light harvesting in photosystem I	0.0256	0.0005	56.97	1.2927e-05	0.000911697		GO:0016021	integral component of membrane	0.621	0.4672	1.33	0.000392549	0.00570229		GO:0015292	uniporter activity	0.0108	0.0002	59.39	0.000418285	0.00946645
GO:0051560	mitochondrial calcium ion homeostasis	0.0171	0.0003	56.97	0.000452995	0.0266234		GO:0009538	photosystem I reaction center	0.0161	0.0008	20.32	0.00417233	0.0505072		GO:0004519	endonuclease activity	0.0484	0.0146	3.31	0.00172262	0.0334162
GO:0006261	DNA-dependent DNA replication	0.0171	0.0011	16.28	0.00648696	0.226275		GO:0010287	plastoglobule	0.0161	0.0013	12.19	0.0115082	0.119409		GO:0003887	DNA-directed DNA polymerase activity	0.0161	0.0014	11.14	0.00243306	0.041298
GO:0009440	cyanate catabolic process	0.0085	0.0001	113.94	0.00877654	0.226275		GO:0005775	vacuolar lumen	0.0081	0.0001	60.97	0.0163343	0.148298		GO:0004888	transmembrane signaling receptor activity	0.0108	0.0005	23.76	0.00303437	0.0457817
GO:0009609	response to symbiotic bacterium	0.0085	0.0001	113.94	0.00877654	0.226275		GO:0019898	extrinsic component of membrane	0.0161	0.0022	7.39	0.029847	0.213959		GO:0016984	ribulose-bisphosphate carboxylase activity	0.0108	0.0005	19.8	0.0044014	0.0597664
GO:0009877	nodulation	0.0085	0.0001	113.94	0.00877654	0.226275		GO:0032421	stereocilium bundle	0.0081	0.0003	30.49	0.0324039	0.213959		GO:0004497	monooxygenase activity	0.0323	0.0085	3.81	0.00512743	0.0632955
GO:0010196	nonphotochemical quenching	0.0085	0.0001	113.94	0.00877654	0.226275		GO:0098807	chloroplast thylakoid membrane protein complex	0.0081	0.0003	30.49	0.0324039	0.213959		GO:0004365	glyceraldehyde-3-phosphate dehydrogenase (NAD+) (phosphorylating) activity	0.0054	0	118.78	0.00841858	0.0952628
GO:0017014	protein nitrosylation	0.0085	0.0001	113.94	0.00877654	0.226275		GO:0098862	cluster of actin-based cell projections	0.0081	0.0003	24.39	0.0403408	0.244168		GO:0060089	molecular transducer activity	0.0108	0.001	10.33	0.0158795	0.136833
GO:0033484	nitric oxide homeostasis	0.0085	0.0001	113.94	0.00877654	0.226275		GO:0008622	epsilon DNA polymerase complex	0.0081	0.0004	20.32	0.0482131	0.250128		GO:0045550	geranylgeranyl reductase activity	0.0054	0.0001	59.39	0.0167667	0.136833
GO:0009853	photorespiration	0.0171	0.0017	10.36	0.0157319	0.226275		GO:0035145	exon-exon junction complex	0.0081	0.0004	20.32	0.0482131	0.250128		GO:0070905	serine binding	0.0054	0.0001	59.39	0.0167667	0.136833
GO:0046777	protein autophosphorylation	0.0171	0.0017	10.36	0.0157319	0.226275		GO:0070775	H3 histone acetyltransferase complex	0.0081	0.0006	13.55	0.0714477	0.324335		GO:0008017	microtubule binding	0.0215	0.0053	4.03	0.0177552	0.136833
GO:0015977	carbon fixation	0.0171	0.0017	9.91	0.0171324	0.226275		GO:0070776	MOZ/MORF histone acetyltransferase complex	0.0081	0.0006	13.55	0.0714477	0.324335		GO:0003777	microtubule motor activity	0.0161	0.0032	5.02	0.0220893	0.136833
GO:0006565	L-serine catabolic process	0.0085	0.0002	56.97	0.0174767	0.226275		GO:0045177	apical part of cell	0.0081	0.0007	12.19	0.0790669	0.337809		GO:0038023	signaling receptor activity	0.0108	0.0013	8.19	0.0246583	0.136833
GO:0019419	sulfate reduction	0.0085	0.0002	56.97	0.0174767	0.226275		GO:0016324	apical plasma membrane	0.0081	0.0007	11.09	0.086624	0.349535		GO:0008460	dTDP-glucose 4,6-dehydratase activity	0.0054	0.0001	39.59	0.0250448	0.136833
GO:0032204	regulation of telomere maintenance	0.0085	0.0002	56.97	0.0174767	0.226275		GO:0030424	axon	0.0081	0.0008	10.16	0.0941196	0.359234		GO:0015232	heme transmembrane transporter activity	0.0054	0.0001	39.59	0.0250448	0.136833
GO:0046655	folic acid metabolic process	0.0085	0.0002	56.97	0.0174767	0.226275		GO:0009507	chloroplast	0.0645	0.0379	1.7	0.0989195	0.359234		GO:0015276	ligand-gated ion channel activity	0.0108	0.0014	7.42	0.0296348	0.136833
Upregulated genes in Sg C. japonica
Biological Process	Description	GeneRatio	BgRatio	enrich_factor	pvalue	qvalue		Cellular Component	Description	GeneRatio	BgRatio	enrich_factor	pvalue	qvalue		Molecular Function	Description	GeneRatio	BgRatio	enrich_factor	pvalue	qvalue
GO:0048544	recognition of pollen	0.1735	0.0066	26.28	5.04056e-20	1.39544e-17		GO:0016021	integral component of membrane	0.7709	0.4672	1.65	6.65565e-17	6.30536e-15		GO:0004672	protein kinase activity	0.1502	0.0421	3.57	6.16007e-11	7.19755e-09
GO:0098869	cellular oxidant detoxification	0.0306	0.0017	18.55	0.00053603	0.0741978		GO:0031354	intrinsic component of plastid outer membrane	0.0056	0.0002	28.16	0.0350971	0.629617		GO:0004674	protein serine/threonine kinase activity	0.0987	0.0226	4.37	3.6599e-09	2.13815e-07
GO:0032875	regulation of DNA endoreduplication	0.0204	0.0008	24.73	0.00281771	0.247199		GO:0031355	integral component of plastid outer membrane	0.0056	0.0002	28.16	0.0350971	0.629617		GO:0005524	ATP binding	0.2876	0.147	1.96	2.32622e-08	9.06003e-07
GO:0009638	phototropism	0.0204	0.001	20.93	0.00395794	0.247199		GO:0031358	intrinsic component of chloroplast outer membrane	0.0056	0.0002	28.16	0.0350971	0.629617		GO:0004497	monooxygenase activity	0.0429	0.0085	5.07	3.11001e-05	0.000908451
GO:0006952	defense response	0.0714	0.0209	3.41	0.00446461	0.247199		GO:0031359	integral component of chloroplast outer membrane	0.0056	0.0002	28.16	0.0350971	0.629617		GO:0043531	ADP binding	0.0515	0.0128	4.04	4.86994e-05	0.00113803
GO:0010411	xyloglucan metabolic process	0.0204	0.0017	11.83	0.0122397	0.497489		GO:0031350	intrinsic component of plastid membrane	0.0056	0.0003	21.12	0.0465217	0.629617		GO:0010333	terpene synthase activity	0.0129	0.0005	25.86	0.000179468	0.00335332
GO:0030150	protein import into mitochondrial matrix	0.0204	0.0018	11.34	0.0132891	0.497489		GO:0031351	integral component of plastid membrane	0.0056	0.0003	21.12	0.0465217	0.629617		GO:0008194	UDP-glycosyltransferase activity	0.0343	0.0069	4.96	0.000226068	0.00335332
GO:0009738	abscisic acid-activated signaling pathway	0.0204	0.0019	10.88	0.0143761	0.497489		GO:0005741	mitochondrial outer membrane	0.0112	0.0022	5.12	0.0579157	0.685843		GO:0020037	heme binding	0.0601	0.0224	2.69	0.000809685	0.0105117
GO:0009733	response to auxin	0.0306	0.006	5.1	0.0210532	0.540549		GO:0009527	plastid outer membrane	0.0056	0.0005	10.56	0.0908907	0.765988		GO:0003700	DNA-binding transcription factor activity	0.0558	0.0234	2.39	0.0034378	0.040168
GO:0009637	response to blue light	0.0204	0.0025	8.24	0.0243601	0.540549		GO:0031304	intrinsic component of mitochondrial inner membrane	0.0056	0.0006	9.39	0.101658	0.765988		GO:0005506	iron ion binding	0.0429	0.016	2.69	0.00443596	0.0471188
GO:0071215	cellular response to abscisic acid stimulus	0.0204	0.0026	7.77	0.0271929	0.540549		GO:0009707	chloroplast outer membrane	0.0056	0.0007	8.45	0.112299	0.765988		GO:0015369	calcium:proton antiporter activity	0.0086	0.0005	15.8	0.00681703	0.0663763
GO:0097306	cellular response to alcohol	0.0204	0.0027	7.56	0.0286567	0.540549		GO:0032592	integral component of mitochondrial membrane	0.0056	0.0008	7.04	0.133206	0.765988		GO:0033612	receptor serine/threonine kinase binding	0.0086	0.0006	14.59	0.0080008	0.0719101
GO:0006850	mitochondrial pyruvate transmembrane transport	0.0102	0.0004	27.21	0.0362253	0.540549		GO:0098573	intrinsic component of mitochondrial membrane	0.0056	0.0008	7.04	0.133206	0.765988		GO:0052747	sinapyl alcohol dehydrogenase activity	0.0043	0	94.82	0.0105458	0.0821466
GO:0009299	mRNA transcription	0.0102	0.0004	27.21	0.0362253	0.540549		GO:0030015	CCR4-NOT core complex	0.0056	0.0009	6.5	0.143475	0.765988		GO:0102098	D-galacturonate reductase activity	0.0043	0	94.82	0.0105458	0.0821466
GO:0007094	mitotic spindle assembly checkpoint	0.0102	0.0005	22.67	0.043313	0.540549		GO:0031968	organelle outer membrane	0.0056	0.0009	6.5	0.143475	0.765988		GO:0030247	polysaccharide binding	0.0129	0.0024	5.47	0.0175101	0.12787
GO:0009610	response to symbiotic fungus	0.0102	0.0005	22.67	0.043313	0.540549		GO:0048046	apoplast	0.0168	0.0073	2.28	0.14457	0.765988		GO:0003998	acylphosphatase activity	0.0043	0.0001	47.41	0.020981	0.144203
GO:0010089	xylem development	0.0102	0.0005	19.43	0.050349	0.540549		GO:0005744	TIM23 mitochondrial import inner membrane translocase complex	0.0056	0.0009	6.03	0.153623	0.765988		GO:0046983	protein dimerization activity	0.0343	0.0153	2.24	0.0274965	0.166269
GO:0032147	activation of protein kinase activity	0.0102	0.0005	19.43	0.050349	0.540549		GO:0031012	extracellular matrix	0.0056	0.0009	6.03	0.153623	0.765988		GO:0008428	ribonuclease inhibitor activity	0.0043	0.0001	31.61	0.0313065	0.166269
GO:0051252	regulation of RNA metabolic process	0.051	0.0209	2.45	0.0540626	0.540549		GO:0031305	integral component of mitochondrial inner membrane	0.0056	0.0009	6.03	0.153623	0.765988		GO:0008531	riboflavin kinase activity	0.0043	0.0001	31.61	0.0313065	0.166269
GO:0019725	cellular homeostasis	0.0204	0.0039	5.23	0.0559457	0.540549		GO:0005819	spindle	0.0056	0.0013	4.45	0.202598	0.872432		GO:0008948	oxaloacetate decarboxylase activity	0.0043	0.0001	31.61	0.0313065	0.166269
Up-accumulation proteins in Tg C. japonica
GO Terms Level	GO Terms Description	GO Terms ID	Mapping	Background	Fold Enrichment	Fisher' exact test P value	-log10(p value)
Cellular Component	intracellular non-membrane-bounded organelle	GO:0043232	69	190	4.52	3.38731e-38	37.47
	non-membrane-bounded organelle	GO:0043228	69	190	4.52	3.38731e-38	37.47
	ribosome	GO:0005840	60	150	4.98	1.41322e-34	33.85
	ribonucleoprotein complex	GO:1990904	61	168	4.52	2.4444e-32	31.61
	intracellular ribonucleoprotein complex	GO:0030529	61	168	4.52	2.4444e-32	31.61
	intracellular organelle	GO:0043229	79	428	2.3	9.84192e-22	21.01
	organelle	GO:0043226	79	428	2.3	9.84192e-22	21.01
	macromolecular complex	GO:0032991	77	488	1.97	7.77726e-16	15.11
Molecular Function	structural constituent of ribosome	GO:0003735	60	148	10.81	3.4052e-64	63.47
	structural molecule activity	GO:0005198	62	179	9.24	3.98237e-13	12.4
	nucleic acid binding	GO:0003676	38	451	2.25	9.45093e-07	6.02
	RNA binding	GO:0003723	21	192	2.92	7.33429e-06	5.13
	rRNA binding	GO:0019843	5	12	11.11	4.47733e-05	4.35
	DNA binding	GO:0003677	11	93	3.15	0.000630263	3.2
	protein heterodimerization activity	GO:0046982	5	22	6.06	0.00109639	2.96
	protein dimerization activity	GO:0046983	6	43	3.72	0.00490363	2.31
Biological Process	protein metabolic process	GO:0019538	75	716	2.49	4.34281e-17	16.36
	macromolecule metabolic process	GO:0043170	77	833	2.2	2.22321e-14	13.65
	biosynthetic process	GO:0009058	76	826	2.19	5.0808e-14	13.29
	translation	GO:0006412	67	271	5.88	1.64535e-13	12.78
	gene expression	GO:0010467	70	332	5.01	2.37366e-13	12.62
	cellular amide metabolic process	GO:0043603	67	308	5.17	3.36287e-13	12.47
	macromolecule biosynthetic process	GO:0009059	67	345	4.62	4.48863e-13	12.35
	cellular macromolecule biosynthetic process	GO:0034645	67	345	4.62	4.48863e-13	12.35
	cellular nitrogen compound biosynthetic process	GO:0044271	68	489	3.31	4.81615e-13	12.32
	peptide biosynthetic process	GO:0043043	67	279	5.71	5.52336e-13	12.26
	peptide metabolic process	GO:0006518	67	289	5.51	5.53446e-13	12.26
	cellular protein metabolic process	GO:0044267	69	536	3.06	5.8098e-13	12.24
	organonitrogen compound biosynthetic process	GO:1901566	69	570	2.88	6.89226e-13	12.16
	cellular biosynthetic process	GO:0044249	74	759	2.32	7.36744e-13	12.13
Up-accumulation proteins in Sg C. japonica
GO Terms Level 1	GO Terms Description	GO Terms ID	Mapping	Background	Fold Enrichment	Fisher' exact test P value	-log10(p value)
Molecular Function	glycine-tRNA ligase activity	GO:0004820	2	4	24.56	0.00239556	2.62
	arginine-tRNA ligase activity	GO:0004814	2	5	19.65	0.0039397	2.4
	chitinase activity	GO:0004568	2	7	14.04	0.00805609	2.09
	hydrolase activity, acting on ester bonds	GO:0016788	7	134	2.57	0.0186536	1.73
	cofactor binding	GO:0048037	12	317	1.86	0.0260675	1.58
	phosphoric diester hydrolase activity	GO:0008081	2	13	7.56	0.0276402	1.56
	coenzyme binding	GO:0050662	9	213	2.08	0.0282926	1.55
Biological Process	response to biotic stimulus	GO:0009607	4	8	24.96	9.75181e-06	5.01
	defense response	GO:0006952	4	9	22.18	1.72879e-05	4.76
	nitrogen compound transport	GO:0071705	3	9	16.64	0.0005938	3.23
	glycyl-tRNA aminoacylation	GO:0006426	2	4	24.96	0.00231364	2.64
	cell wall organization or biogenesis	GO:0071554	3	14	10.7	0.00239416	2.62
	arginyl-tRNA aminoacylation	GO:0006420	2	5	19.97	0.00380614	2.42
	cell wall macromolecule catabolic process	GO:0016998	2	6	16.64	0.00563538	2.25
	cell wall macromolecule metabolic process	GO:0044036	2	7	14.26	0.00778767	2.11
	aminoglycan catabolic process	GO:0006026	2	7	14.26	0.00778767	2.11
	chitin catabolic process	GO:0006032	2	7	14.26	0.00778767	2.11
	amino sugar catabolic process	GO:0046348	2	7	14.26	0.00778767	2.11
	chitin metabolic process	GO:0006030	2	7	14.26	0.00778767	2.11
	glucosamine-containing compound metabolic process	GO:1901071	2	7	14.26	0.00778767	2.11
	glucosamine-containing compound catabolic process	GO:1901072	2	7	14.26	0.00778767	2.11
