# Supplementary material for: Multi-Approach Analysis Reveals Pathways of Cold Tolerance Divergence in Camellia japonica
Source: Front Plant Sci. 2022 Feb 25;13:811791. doi: 10.3389/fpls.2022.811791 (PMC8914472; doi:10.3389/fpls.2022.811791)
Supplement: Supplementary Table 5 — The functional enrichment pathways of Tg and Sg under cold stress. [file Table_5.XLSX]

## Sheet: Sheet1
Sg C. japonica		4h					8h					24h
ID	Description	pvalue	Contained	pvalue	ID	Description	pvalue	Contained	pvalue	ID	Description	pvalue	Contained	pvalue
ko00195	Photosynthesis	5.35301e-23	up&down	1	ko00195	Photosynthesis	1.17301e-07	up&down	1	ko00195	Photosynthesis	3.37492e-08	up&down	1
ko00196	Photosynthesis - antenna proteins	4.29165e-12	up	1	ko04712	Circadian rhythm - plant	1.85351e-06	up&down	0.999996	ko04712	Circadian rhythm - plant	6.7354e-07	up&down	0.999998
ko00906	Carotenoid biosynthesis	0.000875455	up&down	0.997986	ko00196	Photosynthesis - antenna proteins	3.8258e-06	up	0.999991	ko00196	Photosynthesis - antenna proteins	2.3225e-06	up	0.999995
ko04075	Plant hormone signal transduction	0.00108139	up&down	0.997513	ko04075	Plant hormone signal transduction	9.03493e-05	up&down	0.999792	ko04075	Plant hormone signal transduction	3.07846e-05	up&down	0.999929
ko04712	Circadian rhythm - plant	0.0142217	up&down	0.967784	ko04626	Plant-pathogen interaction	0.000231099	up&down	0.999468	ko04626	Plant-pathogen interaction	0.000120343	up&down	0.999723
ko00942	Anthocyanin biosynthesis	0.0263572	up&down	0.941115	ko00945	Stilbenoid, diarylheptanoid and gingerol biosynthesis	0.000873684	up&down	0.99799	ko04016	MAPK signaling pathway - plant	0.000122591	up&down	0.999718
ko02010	ABC transporters	0.0275769	up&down	0.938476	ko00906	Carotenoid biosynthesis	0.00189985	up&down	0.995635	ko00591	Linoleic acid metabolism	0.000365954	up&down	0.999158
ko00565	Ether lipid metabolism	0.0331582	up&down	0.926492	ko04070	Phosphatidylinositol signaling system	0.00286427	up&down	0.993426	ko04070	Phosphatidylinositol signaling system	0.00251885	up&down	0.994217
ko00052	Galactose metabolism	0.0425084	up&down	0.906759	ko00941	Flavonoid biosynthesis	0.00401105	up&down	0.990807	ko00360	Phenylalanine metabolism	0.0131784	up&down	0.970111
ko00966	Glucosinolate biosynthesis	0.0460962	up	0.899298	ko04016	MAPK signaling pathway - plant	0.00401385	up&down	0.9908	ko00565	Ether lipid metabolism	0.0141141	up&down	0.968023
Tg C. japonica		4h					8h					24h
ID	Description	pvalue	Contained	pvalue	ID	Description	pvalue	Contained	pvalue	ID	Description	pvalue	Contained	pvalue
ko04075	Plant hormone signal transduction	2.66846e-08	up&down	1	ko00195	Photosynthesis	4.95251e-22	up&down	1	ko00195	Photosynthesis	1.96736e-23	up&down	1
ko04712	Circadian rhythm - plant	3.90382e-08	up&down	1	ko00196	Photosynthesis - antenna proteins	1.51548e-15	up&down	1	ko00196	Photosynthesis - antenna proteins	1.47712e-17	up&down	1
ko00195	Photosynthesis	7.62265e-07	up&down	0.999998	ko04712	Circadian rhythm - plant	4.79711e-08	up&down	1	ko04075	Plant hormone signal transduction	2.5949e-09	up&down	1
ko04626	Plant-pathogen interaction	9.1909e-07	up&down	0.999998	ko04075	Plant hormone signal transduction	0.000214138	up&down	0.999507	ko04712	Circadian rhythm - plant	7.92064e-07	up&down	0.999998
ko00196	Photosynthesis - antenna proteins	9.86691e-07	up	0.999998	ko00941	Flavonoid biosynthesis	0.000288109	up&down	0.999337	ko04626	Plant-pathogen interaction	1.71213e-06	up&down	0.999996
ko00591	Linoleic acid metabolism	0.000542725	up&down	0.998751	ko04070	Phosphatidylinositol signaling system	0.00131518	up&down	0.996976	ko04016	MAPK signaling pathway - plant	1.11421e-05	up&down	0.999974
ko03018	RNA degradation	0.00187056	up&down	0.995702	ko00904	Diterpenoid biosynthesis	0.00214159	up&down	0.995081	ko00040	Pentose and glucuronate interconversions	0.000748414	up&down	0.998278
ko04016	MAPK signaling pathway - plant	0.00414146	up&down	0.990509	ko00562	Inositol phosphate metabolism	0.00238561	up&down	0.994522	ko00904	Diterpenoid biosynthesis	0.00348247	up&down	0.992013
ko04136	Autophagy - other	0.00524723	up&down	0.987991	ko04626	Plant-pathogen interaction	0.00467713	up&down	0.989288	ko04070	Phosphatidylinositol signaling system	0.0302456	up&down	0.932727
ko00904	Diterpenoid biosynthesis	0.00727617	up&down	0.983386	ko02010	ABC transporters	0.0112762	up&down	0.97437	ko00565	Ether lipid metabolism	0.0336052	up&down	0.925539
