# Supplementary material for: Multi-Approach Analysis Reveals Pathways of Cold Tolerance Divergence in Camellia japonica
Source: Front Plant Sci. 2022 Feb 25;13:811791. doi: 10.3389/fpls.2022.811791 (PMC8914472; doi:10.3389/fpls.2022.811791)
Supplement: Supplementary Table 6 — The functional enrichment pathways of Tg vs. Sg under cold stress. [file Table_6.XLSX]

## Sheet: Sheet1
4h					8h					24h
ID	Description	pvalue	Contained	pvalue	ID	Description	pvalue	Contained	pvalue	ID	Description	pvalue	Contained	pvalue
ko03010	Ribosome	3.09403e-06	up&down	0.999993	ko00941	Flavonoid biosynthesis	1.26202e-10	up&down	1	ko04141	Protein processing in endoplasmic reticulum	0.00176995	up&down	0.995933
ko00750	Vitamin B6 metabolism	0.00950295	up&down	0.978356	ko00940	Phenylpropanoid biosynthesis	5.11741e-07	up&down	0.999999	ko00030	Pentose phosphate pathway	0.00189723	up&down	0.995641
ko00410	beta-Alanine metabolism	0.0151971	up&down	0.965612	ko00906	Carotenoid biosynthesis	0.000151264	up&down	0.999652	ko00020	Citrate cycle (TCA cycle)	0.00660342	down	0.98491
ko00260	Glycine, serine and threonine metabolism	0.0169758	down	0.961666	ko00592	alpha-Linolenic acid metabolism	0.000160775	up&down	0.99963	ko01200	Carbon metabolism	0.00907666	up&down	0.979317
ko00380	Tryptophan metabolism	0.0181116	up&down	0.959154	ko00945	Stilbenoid, diarylheptanoid and gingerol biosynthesis	0.000368851	up&down	0.999151	ko01230	Biosynthesis of amino acids	0.019042	up&down	0.957101
ko00966	Glucosinolate biosynthesis	0.0336835	down	0.925372	ko00909	Sesquiterpenoid and triterpenoid biosynthesis	0.00425915	down	0.990241	ko00100	Steroid biosynthesis	0.022491	up&down	0.949531
ko00100	Steroid biosynthesis	0.0342466	up&down	0.924173	ko00650	Butanoate metabolism	0.00738759	down	0.983133	ko00902	plant hormone signal transduction	0.0338458	up&down	0.925027
ko04141	Protein processing in endoplasmic reticulum	0.0402161	up&down	0.911557	ko04626	Plant-pathogen interaction	0.00859161	up&down	0.980411	ko00052	Galactose metabolism	0.035012	up&down	0.922546
ko00250	Alanine, aspartate and glutamate metabolism	0.0555946	down	0.879844	ko00100	Steroid biosynthesis	0.00925991	down	0.978904	ko00270	Cysteine and methionine metabolism	0.0524472	up&down	0.886243
ko00906	Carotenoid biosynthesis	0.0694232	down	0.852269	ko00360	Phenylalanine metabolism	0.00957764	up&down	0.978188	ko00950	Isoquinoline alkaloid biosynthesis	0.0545086	up&down	0.882046
ko00902	Monoterpenoid biosynthesis	0.0767064	down	0.838096	ko00400	photosynthesis	0.011449	up&down	0.973982	ko01210	2-Oxocarboxylic acid metabolism	0.0731008	down	0.845083
ko00650	Butanoate metabolism	0.0930547	down	0.807133	ko00052	Galactose metabolism	0.0181075	up&down	0.959163	ko00592	alpha-Linolenic acid metabolism	0.086339	up&down	0.819711
ko00950	Isoquinoline alkaloid biosynthesis	0.096247	up&down	0.801222	ko00950	Isoquinoline alkaloid biosynthesis	0.0300056	up&down	0.933242	ko00450	Selenocompound metabolism	0.105257	down	0.784772
ko00942	Anthocyanin biosynthesis	0.100437	down	0.793529	ko00130	Ubiquinone and other terpenoid-quinone biosynthesis	0.0327939	down	0.92727	ko00920	Sulfur metabolism	0.107785	up&down	0.780217
ko01210	2-Oxocarboxylic acid metabolism	0.112151	down	0.772411	ko00350	Tyrosine metabolism	0.0398626	up&down	0.912299	ko00565	Ether lipid metabolism	0.110595	down	0.775185
ko00430	Taurine and hypotaurine metabolism	0.115825	down	0.765905	ko00410	beta-Alanine metabolism	0.0420058	down	0.907808	ko00051	Fructose and mannose metabolism	0.112234	up&down	0.772265
ko01212	Fatty acid metabolism	0.120977	down	0.756873	ko00944	Flavone and flavonol biosynthesis	0.0483225	down	0.8947	ko00650	Butanoate metabolism	0.131052	down	0.739517
ko00280	Valine, leucine and isoleucine degradation	0.127289	up&down	0.745953	ko00902	Monoterpenoid biosynthesis	0.0767064	down	0.838096	ko03013	RNA transport	0.139598	down	0.725107
ko00071	Fatty acid degradation	0.131787	up&down	0.738267	ko00500	Starch and sucrose metabolism	0.0839795	up&down	0.824177	ko00630	Glyoxylate and dicarboxylate metabolism	0.140509	up&down	0.723588
ko00270	Cysteine and methionine metabolism	0.131787	up&down	0.738267	ko00942	Anthocyanin biosynthesis	0.100437	down	0.793529	ko00750	Vitamin B6 metabolism	0.142254	down	0.720687

## Sheet: Sheet2
Description	4h	8h	24h
Ribosome	0.999993	0	0
Vitamin B6 metabolism	0.978356	0	0
beta-Alanine metabolism	0.965612	0	0
Glycine, serine and threonine metabolism	0.961666	0	0
Tryptophan metabolism	0.959154	0	0
Glucosinolate biosynthesis	0.925372	0	0
Steroid biosynthesis	0.924173	0.978904	0.949531
Protein processing in endoplasmic reticulum	0.911557	0	0.995933
Alanine, aspartate and glutamate metabolism	0.879844	0	0
Carotenoid biosynthesis	0.852269	0.999652	0
Flavonoid biosynthesis	0	1	0
Phenylpropanoid biosynthesis	0	0.999999	0
alpha-Linolenic acid metabolism	0	0.99963	0
Stilbenoid, diarylheptanoid and gingerol biosynthesis	0	0.999151	0
Sesquiterpenoid and triterpenoid biosynthesis	0	0.990241	0
Butanoate metabolism	0	0.983133	0
Plant-pathogen interaction	0	0.980411	0
Phenylalanine metabolism	0	0.978188	0
Pentose phosphate pathway	0	0	0.995641
Citrate cycle (TCA cycle)	0	0	0.98491
Carbon metabolism	0	0	0.979317
Biosynthesis of amino acids	0	0	0.957101
Monoterpenoid biosynthesis	0	0	0.925027
Galactose metabolism	0	0	0.922546
Cysteine and methionine metabolism	0	0	0.886243
Isoquinoline alkaloid biosynthesis	0	0	0.882046
