# Supplementary material for: Multi-Approach Analysis Reveals Pathways of Cold Tolerance Divergence in Camellia japonica
Source: Front Plant Sci. 2022 Feb 25;13:811791. doi: 10.3389/fpls.2022.811791 (PMC8914472; doi:10.3389/fpls.2022.811791)
Supplement: Supplementary Table 7 — The enrichment GO terms of WGCNA. [file Table_7.XLSX]

## Sheet: Sheet1
Sg C. japonica
Term	Database	ID	Input number	Background number	P-Value	Corrected P-Value	Input
chloroplast envelope	Gene Ontology	GO:0009941	14	496	4.78327e-07	0.000195158	Gene.63620::c143951.graph_c0::g.63620::m.63620|Gene.123505::c155194.graph_c0::g.123505::m.123505|Gene.70012::c145543.graph_c0::g.70012::m.70012|Gene.58749::c142665.graph_c0::g.58749::m.58749|Gene.69792::c145498.graph_c0::g.69792::m.69792|Gene.13899::c119516.graph_c0::g.13899::m.13899|Gene.59308::c142797.graph_c0::g.59308::m.59308|Gene.62869::c143761.graph_c0::g.62869::m.62869|Gene.62873::c143761.…
cytoplasm	Gene Ontology	GO:0005737	39	4014	8.29474e-05	0.0169213	Gene.41141::c136663.graph_c0::g.41141::m.41141|Gene.67675::c145022.graph_c0::g.67675::m.67675|Gene.58449::c142572.graph_c0::g.58449::m.58449|Gene.80600::c147886.graph_c1::g.80600::m.80600|Gene.85496::c148860.graph_c0::g.85496::m.85496|Gene.1676::c104285.graph_c0::g.1676::m.1676|Gene.51271::c140393.graph_c1::g.51271::m.51271|Gene.56126::c141896.graph_c0::g.56126::m.56126|Gene.101868::c151857.graph…
response to unfolded protein	Gene Ontology	GO:0006986	3	18	0.00016852	0.0229187	Gene.137053::c156915.graph_c0::g.137053::m.137053|Gene.93975::c150460.graph_c0::g.93975::m.93975|Gene.99037::c151370.graph_c0::g.99037::m.99037
protein folding chaperone	Gene Ontology	GO:0044183	3	22	0.000287031	0.0263764	Gene.137053::c156915.graph_c0::g.137053::m.137053|Gene.68929::c145292.graph_c0::g.68929::m.68929|Gene.93975::c150460.graph_c0::g.93975::m.93975
regulation of salicylic acid mediated signaling pathway	Gene Ontology	GO:2000031	3	23	0.000323241	0.0263764	Gene.66109::c144609.graph_c0::g.66109::m.66109|Gene.26284::c129062.graph_c0::g.26284::m.26284|Gene.51271::c140393.graph_c1::g.51271::m.51271
chloroplast	Gene Ontology	GO:0009507	39	4354	0.000443662	0.030169	Gene.58917::c142704.graph_c0::g.58917::m.58917|Gene.121358::c154913.graph_c0::g.121358::m.121358|Gene.119172::c154595.graph_c0::g.119172::m.119172|Gene.50317::c140091.graph_c0::g.50317::m.50317|Gene.11854::c117397.graph_c0::g.11854::m.11854|Gene.78527::c147441.graph_c0::g.78527::m.78527|Gene.7560::c112577.graph_c0::g.7560::m.7560|Gene.45833::c138499.graph_c0::g.45833::m.45833|Gene.59308::c142797.…
cellular response to hypoxia	Gene Ontology	GO:0071456	6	204	0.000812274	0.0423288	Gene.30746::c131702.graph_c0::g.30746::m.30746|Gene.89728::c149686.graph_c0::g.89728::m.89728|Gene.11854::c117397.graph_c0::g.11854::m.11854|Gene.66109::c144609.graph_c0::g.66109::m.66109|Gene.93975::c150460.graph_c0::g.93975::m.93975|Gene.99037::c151370.graph_c0::g.99037::m.99037
pentose-phosphate shunt, non-oxidative branch	Gene Ontology	GO:0009052	2	7	0.000933722	0.0423288	Gene.63620::c143951.graph_c0::g.63620::m.63620|Gene.13899::c119516.graph_c0::g.13899::m.13899
ATP:ADP antiporter activity	Gene Ontology	GO:0005471	2	7	0.000933722	0.0423288	Gene.62869::c143761.graph_c0::g.62869::m.62869|Gene.62873::c143761.graph_c1::g.62873::m.62873
regulation of jasmonic acid mediated signaling pathway	Gene Ontology	GO:2000022	3	36	0.00108157	0.0431438	Gene.66109::c144609.graph_c0::g.66109::m.66109|Gene.26284::c129062.graph_c0::g.26284::m.26284|Gene.51271::c140393.graph_c1::g.51271::m.51271
inositol 3-alpha-galactosyltransferase activity	Gene Ontology	GO:0047216	2	8	0.00116319	0.0431438	Gene.58086::c142451.graph_c0::g.58086::m.58086|Gene.1975::c104676.graph_c0::g.1975::m.1975
response to heat	Gene Ontology	GO:0009408	5	152	0.0013781	0.0468554	Gene.137053::c156915.graph_c0::g.137053::m.137053|Gene.58086::c142451.graph_c0::g.58086::m.58086|Gene.45833::c138499.graph_c0::g.45833::m.45833|Gene.93975::c150460.graph_c0::g.93975::m.93975|Gene.99037::c151370.graph_c0::g.99037::m.99037
plasma membrane	Gene Ontology	GO:0005886	28	2973	0.00158307	0.0496839	Gene.71328::c145848.graph_c0::g.71328::m.71328|Gene.126227::c155552.graph_c0::g.126227::m.126227|Gene.58749::c142665.graph_c0::g.58749::m.58749|Gene.128212::c155836.graph_c0::g.128212::m.128212|Gene.52263::c140735.graph_c0::g.52263::m.52263|Gene.123505::c155194.graph_c0::g.123505::m.123505|Gene.70012::c145543.graph_c0::g.70012::m.70012|Gene.89728::c149686.graph_c0::g.89728::m.89728|Gene.137053::c…
protein storage vacuole	Gene Ontology	GO:0000326	2	11	0.00199574	0.0544352	Gene.30746::c131702.graph_c0::g.30746::m.30746|Gene.89728::c149686.graph_c0::g.89728::m.89728
4 iron, 4 sulfur cluster binding	Gene Ontology	GO:0051539	3	46	0.00209954	0.0544352	Gene.37204::c134919.graph_c0::g.37204::m.37204|Gene.26903::c129427.graph_c0::g.26903::m.26903|Gene.33880::c133358.graph_c0::g.33880::m.33880
protein binding	Gene Ontology	GO:0005515	29	3199	0.00228702	0.0544352	Gene.57894::c142393.graph_c0::g.57894::m.57894|Gene.126227::c155552.graph_c0::g.126227::m.126227|Gene.58749::c142665.graph_c0::g.58749::m.58749|Gene.114078::c153816.graph_c0::g.114078::m.114078|Gene.45833::c138499.graph_c0::g.45833::m.45833|Gene.19807::c124229.graph_c0::g.19807::m.19807|Gene.87084::c149167.graph_c0::g.87084::m.87084|Gene.89728::c149686.graph_c0::g.89728::m.89728|Gene.99599::c1514…
copper ion transmembrane transporter activity	Gene Ontology	GO:0005375	2	12	0.00232047	0.0544352	Gene.164520::c75188.graph_c0::g.164520::m.164520|Gene.13169::c118755.graph_c0::g.13169::m.13169
zinc ion binding	Gene Ontology	GO:0008270	9	545	0.00246928	0.0544352	Gene.63620::c143951.graph_c0::g.63620::m.63620|Gene.87084::c149167.graph_c0::g.87084::m.87084|Gene.135935::c156736.graph_c0::g.135935::m.135935|Gene.13899::c119516.graph_c0::g.13899::m.13899|Gene.159166::c54132.graph_c0::g.159166::m.159166|Gene.41141::c136663.graph_c0::g.41141::m.41141|Gene.59308::c142797.graph_c0::g.59308::m.59308|Gene.107881::c152829.graph_c1::g.107881::m.107881|Gene.122515::c1…
pentose-phosphate shunt	Gene Ontology	GO:0006098	2	13	0.00266839	0.0544352	Gene.63620::c143951.graph_c0::g.63620::m.63620|Gene.13899::c119516.graph_c0::g.13899::m.13899
zinc ion transport	Gene Ontology	GO:0006829	2	13	0.00266839	0.0544352	Gene.164520::c75188.graph_c0::g.164520::m.164520|Gene.13169::c118755.graph_c0::g.13169::m.13169
response to bacterium	Gene Ontology	GO:0009617	4	110	0.00295712	0.0574525	Gene.66109::c144609.graph_c0::g.66109::m.66109|Gene.58749::c142665.graph_c0::g.58749::m.58749|Gene.101868::c151857.graph_c0::g.101868::m.101868|Gene.93975::c150460.graph_c0::g.93975::m.93975
chaperone-mediated protein folding	Gene Ontology	GO:0061077	2	15	0.00343283	0.0608954	Gene.112323::c153555.graph_c0::g.112323::m.112323|Gene.68929::c145292.graph_c0::g.68929::m.68929
oxylipin biosynthetic process	Gene Ontology	GO:0031408	2	17	0.00428711	0.0673636	Gene.101868::c151857.graph_c0::g.101868::m.101868|Gene.169317::c88055.graph_c0::g.169317::m.169317
cellular response to unfolded protein	Gene Ontology	GO:0034620	2	17	0.00428711	0.0673636	Gene.137053::c156915.graph_c0::g.137053::m.137053|Gene.93975::c150460.graph_c0::g.93975::m.93975
regulation of abscisic acid-activated signaling pathway	Gene Ontology	GO:0009787	2	18	0.00474735	0.0693459	Gene.26284::c129062.graph_c0::g.26284::m.26284|Gene.51271::c140393.graph_c1::g.51271::m.51271
oxidation-reduction process	Gene Ontology	GO:0055114	8	494	0.00475903	0.0693459	Gene.67675::c145022.graph_c0::g.67675::m.67675|Gene.69792::c145498.graph_c0::g.69792::m.69792|Gene.85496::c148860.graph_c0::g.85496::m.85496|Gene.17737::c123004.graph_c0::g.17737::m.17737|Gene.170823::c89005.graph_c0::g.170823::m.170823|Gene.47616::c139138.graph_c0::g.47616::m.47616|Gene.97325::c151068.graph_c0::g.97325::m.97325|Gene.159166::c54132.graph_c0::g.159166::m.159166
response to cadmium ion	Gene Ontology	GO:0046686	6	296	0.004989	0.07019	Gene.150885::c22547.graph_c0::g.150885::m.150885|Gene.69792::c145498.graph_c0::g.69792::m.69792|Gene.1676::c104285.graph_c0::g.1676::m.1676|Gene.137053::c156915.graph_c0::g.137053::m.137053|Gene.93975::c150460.graph_c0::g.93975::m.93975|Gene.122515::c155069.graph_c0::g.122515::m.122515
misfolded protein binding	Gene Ontology	GO:0051787	2	20	0.00573282	0.0730935	Gene.137053::c156915.graph_c0::g.137053::m.137053|Gene.93975::c150460.graph_c0::g.93975::m.93975
galactose metabolic process	Gene Ontology	GO:0006012	2	20	0.00573282	0.0730935	Gene.58086::c142451.graph_c0::g.58086::m.58086|Gene.1975::c104676.graph_c0::g.1975::m.1975
zinc ion transmembrane transport	Gene Ontology	GO:0071577	2	22	0.00680342	0.081641	Gene.164520::c75188.graph_c0::g.164520::m.164520|Gene.13169::c118755.graph_c0::g.13169::m.13169
cytoskeleton	Gene Ontology	GO:0005856	2	23	0.00737006	0.0843305	Gene.123505::c155194.graph_c0::g.123505::m.123505|Gene.70012::c145543.graph_c0::g.70012::m.70012
cytosol	Gene Ontology	GO:0005829	26	3025	0.00772785	0.0843305	Gene.67675::c145022.graph_c0::g.67675::m.67675|Gene.71328::c145848.graph_c0::g.71328::m.71328|Gene.50317::c140091.graph_c0::g.50317::m.50317|Gene.34880::c133837.graph_c0::g.34880::m.34880|Gene.58749::c142665.graph_c0::g.58749::m.58749|Gene.101868::c151857.graph_c0::g.101868::m.101868|Gene.59308::c142797.graph_c0::g.59308::m.59308|Gene.123505::c155194.graph_c0::g.123505::m.123505|Gene.2238::c10501…
Tg C. japonica
Term	Database	ID	Input number	Background number	P-Value	Corrected P-Value	Input
response to wounding	Gene Ontology	GO:0009611	25	202	1.38095e-17	8.79665e-15	Gene.55884::c141843.graph_c1::g.55884::m.55884|Gene.115349::c154018.graph_c0::g.115349::m.115349|Gene.60725::c143190.graph_c0::g.60725::m.60725|Gene.54589::c141468.graph_c0::g.54589::m.54589|Gene.107885::c152830.graph_c0::g.107885::m.107885|Gene.31651::c132187.graph_c0::g.31651::m.31651|Gene.131178::c156215.graph_c1::g.131178::m.131178|Gene.70540::c145664.graph_c0::g.70540::m.70540|Gene.76058::c1…
response to cold	Gene Ontology	GO:0009409	19	310	8.02825e-09	1.71716e-06	Gene.50091::c140015.graph_c0::g.50091::m.50091|Gene.97821::c151155.graph_c0::g.97821::m.97821|Gene.164181::c71682.graph_c0::g.164181::m.164181|Gene.40653::c136451.graph_c0::g.40653::m.40653|Gene.64539::c144181.graph_c1::g.64539::m.64539|Gene.50094::c140015.graph_c1::g.50094::m.50094|Gene.80077::c147772.graph_c2::g.80077::m.80077|Gene.115349::c154018.graph_c0::g.115349::m.115349|Gene.120820::c1548…
plasmodesma	Gene Ontology	GO:0009506	32	851	8.08711e-09	1.71716e-06	Gene.52061::c140647.graph_c0::g.52061::m.52061|Gene.164181::c71682.graph_c0::g.164181::m.164181|Gene.64784::c144245.graph_c0::g.64784::m.64784|Gene.66181::c144629.graph_c0::g.66181::m.66181|Gene.33337::c133070.graph_c0::g.33337::m.33337|Gene.46526::c138728.graph_c0::g.46526::m.46526|Gene.127937::c155790.graph_c0::g.127937::m.127937|Gene.122492::c155066.graph_c1::g.122492::m.122492|Gene.104468::c1…
response to chitin	Gene Ontology	GO:0010200	12	129	7.41383e-08	1.18065e-05	Gene.37531::c135071.graph_c0::g.37531::m.37531|Gene.13805::c119403.graph_c0::g.13805::m.13805|Gene.121149::c154884.graph_c1::g.121149::m.121149|Gene.37141::c134892.graph_c0::g.37141::m.37141|Gene.26040::c128933.graph_c0::g.26040::m.26040|Gene.2466::c105312.graph_c0::g.2466::m.2466|Gene.37778::c135170.graph_c0::g.37778::m.37778|Gene.33655::c133251.graph_c0::g.33655::m.33655|Gene.34376::c133593.gra…
protein binding	Gene Ontology	GO:0005515	69	3199	2.23183e-07	2.84336e-05	Gene.105831::c152506.graph_c0::g.105831::m.105831|Gene.117625::c154368.graph_c0::g.117625::m.117625|Gene.55896::c141845.graph_c0::g.55896::m.55896|Gene.31115::c131915.graph_c0::g.31115::m.31115|Gene.26040::c128933.graph_c0::g.26040::m.26040|Gene.115349::c154018.graph_c0::g.115349::m.115349|Gene.120820::c154838.graph_c0::g.120820::m.120820|Gene.114870::c153938.graph_c1::g.114870::m.114870|Gene.760…
regulation of defense response	Gene Ontology	GO:0031347	8	54	4.71411e-07	5.00481e-05	Gene.76058::c146929.graph_c0::g.76058::m.76058|Gene.31684::c132202.graph_c1::g.31684::m.31684|Gene.34376::c133593.graph_c0::g.34376::m.34376|Gene.34960::c133876.graph_c0::g.34960::m.34960|Gene.25592::c128615.graph_c0::g.25592::m.25592|Gene.22130::c126288.graph_c0::g.22130::m.22130|Gene.31651::c132187.graph_c0::g.31651::m.31651|Gene.131178::c156215.graph_c1::g.131178::m.131178
response to jasmonic acid	Gene Ontology	GO:0009753	10	107	8.77614e-07	7.98629e-05	Gene.38471::c135510.graph_c0::g.38471::m.38471|Gene.13805::c119403.graph_c0::g.13805::m.13805|Gene.121149::c154884.graph_c1::g.121149::m.121149|Gene.70540::c145664.graph_c0::g.70540::m.70540|Gene.115349::c154018.graph_c0::g.115349::m.115349|Gene.76058::c146929.graph_c0::g.76058::m.76058|Gene.34960::c133876.graph_c0::g.34960::m.34960|Gene.25592::c128615.graph_c0::g.25592::m.25592|Gene.39671::c1360…
cellular response to hypoxia	Gene Ontology	GO:0071456	13	204	1.24642e-06	9.92459e-05	Gene.102663::c151992.graph_c0::g.102663::m.102663|Gene.103081::c152059.graph_c0::g.103081::m.103081|Gene.98073::c151201.graph_c0::g.98073::m.98073|Gene.81366::c148044.graph_c0::g.81366::m.81366|Gene.55884::c141843.graph_c1::g.55884::m.55884|Gene.53719::c141207.graph_c0::g.53719::m.53719|Gene.117018::c154273.graph_c0::g.117018::m.117018|Gene.78961::c147522.graph_c0::g.78961::m.78961|Gene.98498::c1…
plant-type cell wall	Gene Ontology	GO:0009505	12	176	1.65129e-06	0.000116874	Gene.52061::c140647.graph_c0::g.52061::m.52061|Gene.118513::c154505.graph_c1::g.118513::m.118513|Gene.54766::c141521.graph_c0::g.54766::m.54766|Gene.26532::c129214.graph_c0::g.26532::m.26532|Gene.101359::c151769.graph_c0::g.101359::m.101359|Gene.8503::c113602.graph_c0::g.8503::m.8503|Gene.64784::c144245.graph_c0::g.64784::m.64784|Gene.49093::c139692.graph_c1::g.49093::m.49093|Gene.51454::c140456.…
plasma membrane	Gene Ontology	GO:0005886	61	2973	6.14043e-06	0.000391145	Gene.37531::c135071.graph_c0::g.37531::m.37531|Gene.40653::c136451.graph_c0::g.40653::m.40653|Gene.50802::c140243.graph_c0::g.50802::m.50802|Gene.79981::c147750.graph_c1::g.79981::m.79981|Gene.50657::c140189.graph_c0::g.50657::m.50657|Gene.46526::c138728.graph_c0::g.46526::m.46526|Gene.62510::c143666.graph_c0::g.62510::m.62510|Gene.52088::c140661.graph_c1::g.52088::m.52088|Gene.34736::c133780.gra…
defense response to bacterium	Gene Ontology	GO:0042742	15	324	8.18115e-06	0.000473763	Gene.31651::c132187.graph_c0::g.31651::m.31651|Gene.19790::c124210.graph_c0::g.19790::m.19790|Gene.122492::c155066.graph_c1::g.122492::m.122492|Gene.37141::c134892.graph_c0::g.37141::m.37141|Gene.76058::c146929.graph_c0::g.76058::m.76058|Gene.93146::c150307.graph_c0::g.93146::m.93146|Gene.134793::c156614.graph_c1::g.134793::m.134793|Gene.53719::c141207.graph_c0::g.53719::m.53719|Gene.57630::c1423…
jasmonic acid biosynthetic process	Gene Ontology	GO:0009695	5	26	2.33518e-05	0.00123959	Gene.70540::c145664.graph_c0::g.70540::m.70540|Gene.38471::c135510.graph_c0::g.38471::m.38471|Gene.52088::c140661.graph_c1::g.52088::m.52088|Gene.102663::c151992.graph_c0::g.102663::m.102663|Gene.54589::c141468.graph_c0::g.54589::m.54589
DNA-binding transcription factor activity	Gene Ontology	GO:0003700	36	1513	3.49952e-05	0.00171477	Gene.37531::c135071.graph_c0::g.37531::m.37531|Gene.55896::c141845.graph_c0::g.55896::m.55896|Gene.68884::c145279.graph_c0::g.68884::m.68884|Gene.26040::c128933.graph_c0::g.26040::m.26040|Gene.64757::c144239.graph_c0::g.64757::m.64757|Gene.53719::c141207.graph_c0::g.53719::m.53719|Gene.90700::c149867.graph_c0::g.90700::m.90700|Gene.32428::c132602.graph_c0::g.32428::m.32428|Gene.37778::c135170.gra…
oxylipin biosynthetic process	Gene Ontology	GO:0031408	4	17	8.08537e-05	0.00343359	Gene.70540::c145664.graph_c0::g.70540::m.70540|Gene.38471::c135510.graph_c0::g.38471::m.38471|Gene.102663::c151992.graph_c0::g.102663::m.102663|Gene.54589::c141468.graph_c0::g.54589::m.54589
regulation of jasmonic acid mediated signaling pathway	Gene Ontology	GO:2000022	5	36	9.39261e-05	0.00366146	Gene.34960::c133876.graph_c0::g.34960::m.34960|Gene.25592::c128615.graph_c0::g.25592::m.25592|Gene.31684::c132202.graph_c1::g.31684::m.31684|Gene.76058::c146929.graph_c0::g.76058::m.76058|Gene.31651::c132187.graph_c0::g.31651::m.31651
inflorescence development	Gene Ontology	GO:0010229	4	18	9.79471e-05	0.00366146	Gene.55050::c141611.graph_c0::g.55050::m.55050|Gene.104435::c152258.graph_c1::g.104435::m.104435|Gene.104001::c152198.graph_c0::g.104001::m.104001|Gene.33655::c133251.graph_c0::g.33655::m.33655
plastid	Gene Ontology	GO:0009536	23	823	0.000103464	0.00366146	Gene.39951::c136158.graph_c1::g.39951::m.39951|Gene.33945::c133391.graph_c0::g.33945::m.33945|Gene.57630::c142316.graph_c0::g.57630::m.57630|Gene.10954::c116167.graph_c0::g.10954::m.10954|Gene.68826::c145266.graph_c0::g.68826::m.68826|Gene.51804::c140559.graph_c0::g.51804::m.51804|Gene.93146::c150307.graph_c0::g.93146::m.93146|Gene.61217::c143329.graph_c0::g.61217::m.61217|Gene.19790::c124210.gra…
defense response to fungus	Gene Ontology	GO:0050832	10	194	0.000114344	0.00368128	Gene.114870::c153938.graph_c1::g.114870::m.114870|Gene.57719::c142342.graph_c0::g.57719::m.57719|Gene.70540::c145664.graph_c0::g.70540::m.70540|Gene.22768::c126695.graph_c0::g.22768::m.22768|Gene.129075::c155951.graph_c0::g.129075::m.129075|Gene.34376::c133593.graph_c0::g.34376::m.34376|Gene.73999::c146459.graph_c0::g.73999::m.73999|Gene.32428::c132602.graph_c0::g.32428::m.32428|Gene.22130::c1262…
anchored component of plasma membrane	Gene Ontology	GO:0046658	9	157	0.000117155	0.00368128	Gene.8168::c113252.graph_c0::g.8168::m.8168|Gene.50657::c140189.graph_c0::g.50657::m.50657|Gene.66181::c144629.graph_c0::g.66181::m.66181|Gene.122492::c155066.graph_c1::g.122492::m.122492|Gene.73628::c146384.graph_c0::g.73628::m.73628|Gene.87455::c149234.graph_c1::g.87455::m.87455|Gene.12565::c118243.graph_c0::g.12565::m.12565|Gene.169465::c88165.graph_c0::g.169465::m.169465|Gene.7229::c112221.gr…
endoplasmic reticulum	Gene Ontology	GO:0005783	21	722	0.000121361	0.00368128	Gene.50091::c140015.graph_c0::g.50091::m.50091|Gene.61217::c143329.graph_c0::g.61217::m.61217|Gene.79473::c147628.graph_c1::g.79473::m.79473|Gene.40653::c136451.graph_c0::g.40653::m.40653|Gene.61651::c143447.graph_c0::g.61651::m.61651|Gene.50094::c140015.graph_c1::g.50094::m.50094|Gene.84738::c148713.graph_c0::g.84738::m.84738|Gene.120820::c154838.graph_c0::g.120820::m.120820|Gene.38288::c135414.…
response to water deprivation	Gene Ontology	GO:0009414	12	282	0.000139569	0.00404115	Gene.50091::c140015.graph_c0::g.50091::m.50091|Gene.120820::c154838.graph_c0::g.120820::m.120820|Gene.40653::c136451.graph_c0::g.40653::m.40653|Gene.104468::c152265.graph_c1::g.104468::m.104468|Gene.50094::c140015.graph_c1::g.50094::m.50094|Gene.97821::c151155.graph_c0::g.97821::m.97821|Gene.164181::c71682.graph_c0::g.164181::m.164181|Gene.42734::c137276.graph_c0::g.42734::m.42734|Gene.78961::c14…
anchored component of membrane	Gene Ontology	GO:0031225	10	208	0.000196287	0.00523877	Gene.8168::c113252.graph_c0::g.8168::m.8168|Gene.50657::c140189.graph_c0::g.50657::m.50657|Gene.12565::c118243.graph_c0::g.12565::m.12565|Gene.167120::c83135.graph_c0::g.167120::m.167120|Gene.74080::c146476.graph_c0::g.74080::m.74080|Gene.33606::c133230.graph_c0::g.33606::m.33606|Gene.169465::c88165.graph_c0::g.169465::m.169465|Gene.47673::c139162.graph_c0::g.47673::m.47673|Gene.46526::c138728.gr…
calmodulin binding	Gene Ontology	GO:0005516	9	169	0.000198222	0.00523877	Gene.78392::c147411.graph_c0::g.78392::m.78392|Gene.79981::c147750.graph_c1::g.79981::m.79981|Gene.116458::c154182.graph_c0::g.116458::m.116458|Gene.126962::c155650.graph_c0::g.126962::m.126962|Gene.53719::c141207.graph_c0::g.53719::m.53719|Gene.69684::c145467.graph_c0::g.69684::m.69684|Gene.120280::c154755.graph_c0::g.120280::m.120280|Gene.93146::c150307.graph_c0::g.93146::m.93146|Gene.82551::c1…
response to salicylic acid	Gene Ontology	GO:0009751	7	100	0.000213484	0.00523877	Gene.102663::c151992.graph_c0::g.102663::m.102663|Gene.22130::c126288.graph_c0::g.22130::m.22130|Gene.34376::c133593.graph_c0::g.34376::m.34376|Gene.34960::c133876.graph_c0::g.34960::m.34960|Gene.123348::c155175.graph_c0::g.123348::m.123348|Gene.25592::c128615.graph_c0::g.25592::m.25592|Gene.131178::c156215.graph_c1::g.131178::m.131178
cysteine-type endopeptidase inhibitor activity	Gene Ontology	GO:0004869	3	8	0.000217482	0.00523877	Gene.50091::c140015.graph_c0::g.50091::m.50091|Gene.120820::c154838.graph_c0::g.120820::m.120820|Gene.50094::c140015.graph_c1::g.50094::m.50094
response to desiccation	Gene Ontology	GO:0009269	4	24	0.000259946	0.00591376	Gene.72370::c146079.graph_c0::g.72370::m.72370|Gene.49863::c139959.graph_c0::g.49863::m.49863|Gene.13805::c119403.graph_c0::g.13805::m.13805|Gene.121149::c154884.graph_c1::g.121149::m.121149
cellular response to light stimulus	Gene Ontology	GO:0071482	3	10	0.000370719	0.00814303	Gene.111450::c153424.graph_c0::g.111450::m.111450|Gene.71042::c145782.graph_c1::g.71042::m.71042|Gene.129563::c156007.graph_c1::g.129563::m.129563
Golgi apparatus	Gene Ontology	GO:0005794	26	1088	0.000409386	0.00869264	Gene.121957::c154995.graph_c0::g.121957::m.121957|Gene.66891::c144821.graph_c0::g.66891::m.66891|Gene.10954::c116167.graph_c0::g.10954::m.10954|Gene.114318::c153853.graph_c0::g.114318::m.114318|Gene.72430::c146094.graph_c1::g.72430::m.72430|Gene.27228::c129638.graph_c0::g.27228::m.27228|Gene.57719::c142342.graph_c0::g.57719::m.57719|Gene.61651::c143447.graph_c0::g.61651::m.61651|Gene.115555::c154…
defense response, incompatible interaction	Gene Ontology	GO:0009814	4	28	0.00044065	0.00876622	Gene.37531::c135071.graph_c0::g.37531::m.37531|Gene.9356::c114525.graph_c0::g.9356::m.9356|Gene.104435::c152258.graph_c1::g.104435::m.104435|Gene.122492::c155066.graph_c1::g.122492::m.122492
lipid metabolic process	Gene Ontology	GO:0006629	6	81	0.000455261	0.00876622	Gene.102663::c151992.graph_c0::g.102663::m.102663|Gene.92138::c150133.graph_c1::g.92138::m.92138|Gene.50657::c140189.graph_c0::g.50657::m.50657|Gene.35086::c133927.graph_c0::g.35086::m.35086|Gene.93465::c150362.graph_c0::g.93465::m.93465|Gene.17791::c123033.graph_c0::g.17791::m.17791
positive regulation of transcription, DNA-templated	Gene Ontology	GO:0045893	11	277	0.000460088	0.00876622	Gene.13805::c119403.graph_c0::g.13805::m.13805|Gene.55896::c141845.graph_c0::g.55896::m.55896|Gene.68884::c145279.graph_c0::g.68884::m.68884|Gene.37141::c134892.graph_c0::g.37141::m.37141|Gene.78792::c147490.graph_c2::g.78792::m.78792|Gene.24820::c128055.graph_c0::g.24820::m.24820|Gene.90700::c149867.graph_c0::g.90700::m.90700|Gene.107810::c152817.graph_c1::g.107810::m.107810|Gene.121149::c154884…
hyperosmotic response	Gene Ontology	GO:0006972	3	11	0.000467899	0.00876622	Gene.50091::c140015.graph_c0::g.50091::m.50091|Gene.120820::c154838.graph_c0::g.120820::m.120820|Gene.50094::c140015.graph_c1::g.50094::m.50094
