# Supplementary material for: Multi-Approach Analysis Reveals Pathways of Cold Tolerance Divergence in Camellia japonica
Source: Front Plant Sci. 2022 Feb 25;13:811791. doi: 10.3389/fpls.2022.811791 (PMC8914472; doi:10.3389/fpls.2022.811791)
Supplement: Supplementary Table 8 — The enrichment KEGG pathways of WGCNA. [file Table_8.XLSX]

## Sheet: Sheet1
Sg C. japonica
Term	Database	ID	Input number	Background number	P-Value	Corrected P-Value	Input
Carbon metabolism	KEGG PATHWAY	ath01200	6	273	0.00340149	0.0608954	Gene.63620::c143951.graph_c0::g.63620::m.63620|Gene.62911::c143772.graph_c0::g.62911::m.62911|Gene.13899::c119516.graph_c0::g.13899::m.13899|Gene.159166::c54132.graph_c0::g.159166::m.159166|Gene.46794::c138838.graph_c0::g.46794::m.46794|Gene.122515::c155069.graph_c0::g.122515::m.122515
Tryptophan metabolism	KEGG PATHWAY	ath00380	3	60	0.00429278	0.0673636	Gene.114187::c153831.graph_c0::g.114187::m.114187|Gene.17737::c123004.graph_c0::g.17737::m.17737|Gene.46794::c138838.graph_c0::g.46794::m.46794
Protein processing in endoplasmic reticulum	KEGG PATHWAY	ath04141	5	211	0.00542513	0.0730935	Gene.45833::c138499.graph_c0::g.45833::m.45833|Gene.137053::c156915.graph_c0::g.137053::m.137053|Gene.88952::c149524.graph_c0::g.88952::m.88952|Gene.93975::c150460.graph_c0::g.93975::m.93975|Gene.56373::c141951.graph_c2::g.56373::m.56373
Metabolic pathways	KEGG PATHWAY	ath01100	21	2246	0.00680329	0.081641	Gene.63620::c143951.graph_c0::g.63620::m.63620|Gene.62911::c143772.graph_c0::g.62911::m.62911|Gene.58086::c142451.graph_c0::g.58086::m.58086|Gene.13899::c119516.graph_c0::g.13899::m.13899|Gene.45005::c138202.graph_c0::g.45005::m.45005|Gene.1676::c104285.graph_c0::g.1676::m.1676|Gene.38685::c135601.graph_c0::g.38685::m.38685|Gene.71328::c145848.graph_c0::g.71328::m.71328|Gene.170823::c89005.graph_…
Biosynthesis of secondary metabolites	KEGG PATHWAY	ath01110	12	1107	0.0137789	0.10292	Gene.63620::c143951.graph_c0::g.63620::m.63620|Gene.41141::c136663.graph_c0::g.41141::m.41141|Gene.114392::c153864.graph_c0::g.114392::m.114392|Gene.13899::c119516.graph_c0::g.13899::m.13899|Gene.17737::c123004.graph_c0::g.17737::m.17737|Gene.71328::c145848.graph_c0::g.71328::m.71328|Gene.159166::c54132.graph_c0::g.159166::m.159166|Gene.34880::c133837.graph_c0::g.34880::m.34880|Gene.101868::c1518…
Steroid biosynthesis	KEGG PATHWAY	ath00100	2	35	0.0157128	0.110531	Gene.34880::c133837.graph_c0::g.34880::m.34880|Gene.126133::c155539.graph_c0::g.126133::m.126133
Nitrogen metabolism	KEGG PATHWAY	ath00910	2	43	0.0227378	0.130662	Gene.59308::c142797.graph_c0::g.59308::m.59308|Gene.122515::c155069.graph_c0::g.122515::m.122515
alpha-Linolenic acid metabolism	KEGG PATHWAY	ath00592	2	44	0.0236918	0.134254	Gene.101868::c151857.graph_c0::g.101868::m.101868|Gene.169317::c88055.graph_c0::g.169317::m.169317
Fatty acid degradation	KEGG PATHWAY	ath00071	2	47	0.0266503	0.13665	Gene.17737::c123004.graph_c0::g.17737::m.17737|Gene.159166::c54132.graph_c0::g.159166::m.159166
Ascorbate and aldarate metabolism	KEGG PATHWAY	ath00053	2	53	0.0329848	0.138449	Gene.17737::c123004.graph_c0::g.17737::m.17737|Gene.170823::c89005.graph_c0::g.170823::m.170823
Limonene and pinene degradation	KEGG PATHWAY	ath00903	1	6	0.0356303	0.138449	Gene.17737::c123004.graph_c0::g.17737::m.17737
Galactose metabolism	KEGG PATHWAY	ath00052	2	57	0.0375012	0.139949	Gene.58086::c142451.graph_c0::g.58086::m.58086|Gene.1975::c104676.graph_c0::g.1975::m.1975
Pentose phosphate pathway	KEGG PATHWAY	ath00030	2	58	0.0386653	0.139949	Gene.63620::c143951.graph_c0::g.63620::m.63620|Gene.13899::c119516.graph_c0::g.13899::m.13899
Linoleic acid metabolism	KEGG PATHWAY	ath00591	1	9	0.0505114	0.146161	Gene.101868::c151857.graph_c0::g.101868::m.101868
Glyoxylate and dicarboxylate metabolism	KEGG PATHWAY	ath00630	2	78	0.0646004	0.154375	Gene.62911::c143772.graph_c0::g.62911::m.62911|Gene.46794::c138838.graph_c0::g.46794::m.46794
Sulfur relay system	KEGG PATHWAY	ath04122	1	13	0.0699983	0.154375	Gene.50922::c140277.graph_c0::g.50922::m.50922
Pyruvate metabolism	KEGG PATHWAY	ath00620	2	86	0.0762204	0.161968	Gene.45005::c138202.graph_c0::g.45005::m.45005|Gene.17737::c123004.graph_c0::g.17737::m.17737
Biotin metabolism	KEGG PATHWAY	ath00780	1	16	0.0843521	0.167881	Gene.38685::c135601.graph_c0::g.38685::m.38685
Histidine metabolism	KEGG PATHWAY	ath00340	1	18	0.0937987	0.178831	Gene.17737::c123004.graph_c0::g.17737::m.17737
Glutathione metabolism	KEGG PATHWAY	ath00480	2	102	0.101197	0.184581	Gene.1676::c104285.graph_c0::g.1676::m.1676|Gene.170823::c89005.graph_c0::g.170823::m.170823
Tg C. japonica
Term	Database	ID	Input number	Background number	P-Value	Corrected P-Value	Input
Plant-pathogen interaction	KEGG PATHWAY	ath04626	10	170	4.02091e-05	0.00182951	Gene.78392::c147411.graph_c0::g.78392::m.78392|Gene.45013::c138207.graph_c0::g.45013::m.45013|Gene.79981::c147750.graph_c1::g.79981::m.79981|Gene.120280::c154755.graph_c0::g.120280::m.120280|Gene.114153::c153824.graph_c1::g.114153::m.114153|Gene.171734::c89667.graph_c0::g.171734::m.171734|Gene.86268::c149006.graph_c2::g.86268::m.86268|Gene.104435::c152258.graph_c1::g.104435::m.104435|Gene.82551::…
alpha-Linolenic acid metabolism	KEGG PATHWAY	ath00592	5	44	0.000222052	0.00523877	Gene.70540::c145664.graph_c0::g.70540::m.70540|Gene.38471::c135510.graph_c0::g.38471::m.38471|Gene.52088::c140661.graph_c1::g.52088::m.52088|Gene.102663::c151992.graph_c0::g.102663::m.102663|Gene.54589::c141468.graph_c0::g.54589::m.54589
MAPK signaling pathway - plant	KEGG PATHWAY	ath04016	7	134	0.00111873	0.0164374	Gene.13805::c119403.graph_c0::g.13805::m.13805|Gene.121149::c154884.graph_c1::g.121149::m.121149|Gene.24820::c128055.graph_c0::g.24820::m.24820|Gene.104435::c152258.graph_c1::g.104435::m.104435|Gene.104001::c152198.graph_c0::g.104001::m.104001|Gene.108589::c152945.graph_c0::g.108589::m.108589|Gene.33655::c133251.graph_c0::g.33655::m.33655
Plant hormone signal transduction	KEGG PATHWAY	ath04075	9	273	0.00489736	0.0439383	Gene.13805::c119403.graph_c0::g.13805::m.13805|Gene.121149::c154884.graph_c1::g.121149::m.121149|Gene.76058::c146929.graph_c0::g.76058::m.76058|Gene.115340::c154015.graph_c0::g.115340::m.115340|Gene.104435::c152258.graph_c1::g.104435::m.104435|Gene.108589::c152945.graph_c0::g.108589::m.108589|Gene.34960::c133876.graph_c0::g.34960::m.34960|Gene.25592::c128615.graph_c0::g.25592::m.25592|Gene.31651:…
Thiamine metabolism	KEGG PATHWAY	ath00730	2	21	0.0272927	0.130718	Gene.94889::c150621.graph_c0::g.94889::m.94889|Gene.101452::c151783.graph_c0::g.101452::m.101452
Carbon metabolism	KEGG PATHWAY	ath01200	7	273	0.0398889	0.174647	Gene.42896::c137342.graph_c0::g.42896::m.42896|Gene.17377::c122766.graph_c0::g.17377::m.17377|Gene.93253::c150324.graph_c1::g.93253::m.93253|Gene.157279::c44642.graph_c0::g.157279::m.157279|Gene.113136::c153676.graph_c0::g.113136::m.113136|Gene.107235::c152728.graph_c0::g.107235::m.107235|Gene.86507::c149054.graph_c1::g.86507::m.86507
Carbon fixation in photosynthetic organisms	KEGG PATHWAY	ath00710	3	69	0.0476149	0.202205	Gene.93253::c150324.graph_c1::g.93253::m.93253|Gene.17377::c122766.graph_c0::g.17377::m.17377|Gene.157279::c44642.graph_c0::g.157279::m.157279
Phosphatidylinositol signaling system	KEGG PATHWAY	ath04070	3	76	0.0596758	0.225841	Gene.107885::c152830.graph_c0::g.107885::m.107885|Gene.90434::c149816.graph_c0::g.90434::m.90434|Gene.24390::c127806.graph_c0::g.24390::m.24390
Glyoxylate and dicarboxylate metabolism	KEGG PATHWAY	ath00630	3	78	0.0633604	0.225841	Gene.93253::c150324.graph_c1::g.93253::m.93253|Gene.17377::c122766.graph_c0::g.17377::m.17377|Gene.157279::c44642.graph_c0::g.157279::m.157279
Phagosome	KEGG PATHWAY	ath04145	3	82	0.071036	0.237273	Gene.67167::c144884.graph_c0::g.67167::m.67167|Gene.44135::c137846.graph_c0::g.44135::m.44135|Gene.68826::c145266.graph_c0::g.68826::m.68826
Monoterpenoid biosynthesis	KEGG PATHWAY	ath00902	1	8	0.0967573	0.254755	Gene.118510::c154505.graph_c0::g.118510::m.118510
Glycerophospholipid metabolism	KEGG PATHWAY	ath00564	3	97	0.103209	0.266171	Gene.107885::c152830.graph_c0::g.107885::m.107885|Gene.24390::c127806.graph_c0::g.24390::m.24390|Gene.73648::c146390.graph_c0::g.73648::m.73648
Ribosome	KEGG PATHWAY	ath03010	7	364	0.106877	0.270847	Gene.27228::c129638.graph_c0::g.27228::m.27228|Gene.15441::c121041.graph_c0::g.15441::m.15441|Gene.90066::c149752.graph_c0::g.90066::m.90066|Gene.127801::c155772.graph_c2::g.127801::m.127801|Gene.61607::c143434.graph_c0::g.61607::m.61607|Gene.22447::c126470.graph_c1::g.22447::m.22447|Gene.33337::c133070.graph_c0::g.33337::m.33337
Linoleic acid metabolism	KEGG PATHWAY	ath00591	1	9	0.106914	0.267076	Gene.38471::c135510.graph_c0::g.38471::m.38471
Oxidative phosphorylation	KEGG PATHWAY	ath00190	4	160	0.114267	0.26896	Gene.67167::c144884.graph_c0::g.67167::m.67167|Gene.111002::c153354.graph_c0::g.111002::m.111002|Gene.44135::c137846.graph_c0::g.44135::m.44135|Gene.63919::c144023.graph_c1::g.63919::m.63919
DNA replication	KEGG PATHWAY	ath03030	2	50	0.11597	0.26896	Gene.115455::c154033.graph_c0::g.115455::m.115455|Gene.64120::c144070.graph_c1::g.64120::m.64120
Starch and sucrose metabolism	KEGG PATHWAY	ath00500	4	165	0.123728	0.270847	Gene.117078::c154282.graph_c1::g.117078::m.117078|Gene.63922::c144025.graph_c0::g.63922::m.63922|Gene.78262::c147377.graph_c0::g.78262::m.78262|Gene.14514::c120125.graph_c0::g.14514::m.14514
Arginine and proline metabolism	KEGG PATHWAY	ath00330	2	54	0.130908	0.277037	Gene.115349::c154018.graph_c0::g.115349::m.115349|Gene.64587::c144193.graph_c2::g.64587::m.64587
Pentose phosphate pathway	KEGG PATHWAY	ath00030	2	58	0.146255	0.288753	Gene.42896::c137342.graph_c0::g.42896::m.42896|Gene.113136::c153676.graph_c0::g.113136::m.113136	http://www.genome.jp/kegg-bin/show_pathway?ath00030/ath:AT5G24400%09red/ath:AT1G32380%09red
Terpenoid backbone biosynthesis	KEGG PATHWAY	ath00900	2	60	0.154061	0.295781	Gene.61217::c143329.graph_c0::g.61217::m.61217|Gene.101452::c151783.graph_c0::g.101452::m.101452	http://www.genome.jp/kegg-bin/show_pathway?ath00900/ath:AT1G76490%09red/ath:AT4G15560%09red
