# Supplementary material for: Multi-Approach Analysis Reveals Pathways of Cold Tolerance Divergence in Camellia japonica
Source: Front Plant Sci. 2022 Feb 25;13:811791. doi: 10.3389/fpls.2022.811791 (PMC8914472; doi:10.3389/fpls.2022.811791)
Supplement: Supplementary Table 9 — The annotation of cold genes related to photosynthesis. [file Table_9.XLSX]

## Sheet: transcriptome
#Query	Gene ID|Gene name|Hyperlink
Gene.7270::c112266.graph_c0::g.7270::m.7270	ath:AT1G52230|PSAH2|http://www.genome.jp/dbget-bin/www_bget?ath:AT1G52230
Gene.10768::c115973.graph_c0::g.10768::m.10768	ath:AT4G04640|ATPC1|http://www.genome.jp/dbget-bin/www_bget?ath:AT4G04640
Gene.12111::c117735.graph_c0::g.12111::m.12111	ath:AT2G20260|PSAE-2|http://www.genome.jp/dbget-bin/www_bget?ath:AT2G20260
Gene.17426::c122800.graph_c0::g.17426::m.17426	ath:AT5G64040|PSAN|http://www.genome.jp/dbget-bin/www_bget?ath:AT5G64040
Gene.21036::c125299.graph_c0::g.21036::m.21036	ath:AT1G52230|PSAH2|http://www.genome.jp/dbget-bin/www_bget?ath:AT1G52230
Gene.25334::c128391.graph_c0::g.25334::m.25334	ath:AT2G30570|PSBW|http://www.genome.jp/dbget-bin/www_bget?ath:AT2G30570
Gene.33841::c133341.graph_c0::g.33841::m.33841	ath:AT1G06680|PSBP-1|http://www.genome.jp/dbget-bin/www_bget?ath:AT1G06680
Gene.41390::c136752.graph_c0::g.41390::m.41390	ath:AT1G30380|PSAK|http://www.genome.jp/dbget-bin/www_bget?ath:AT1G30380
Gene.44951::c138171.graph_c1::g.44951::m.44951	ath:AT5G66570|PSBO1|http://www.genome.jp/dbget-bin/www_bget?ath:AT5G66570
Gene.45470::c138372.graph_c0::g.45470::m.45470	ath:AT1G67740|PSBY|http://www.genome.jp/dbget-bin/www_bget?ath:AT1G67740
Gene.50827::c140248.graph_c0::g.50827::m.50827	None
Gene.51011::c140309.graph_c0::g.51011::m.51011	ath:AT2G30570|PSBW|http://www.genome.jp/dbget-bin/www_bget?ath:AT2G30570
Gene.51763::c140550.graph_c0::g.51763::m.51763	ath:AT1G55670|PSAG|http://www.genome.jp/dbget-bin/www_bget?ath:AT1G55670
Gene.51923::c140598.graph_c0::g.51923::m.51923	ath:AT1G52230|PSAH2|http://www.genome.jp/dbget-bin/www_bget?ath:AT1G52230
Gene.55751::c141810.graph_c0::g.55751::m.55751	ath:AT2G19740||http://www.genome.jp/dbget-bin/www_bget?ath:AT2G19740
Gene.60253::c143052.graph_c0::g.60253::m.60253	ath:AT5G45040|CYTC6A|http://www.genome.jp/dbget-bin/www_bget?ath:AT5G45040
Gene.60761::c143200.graph_c0::g.60761::m.60761	ath:AT3G01440|PnsL3|http://www.genome.jp/dbget-bin/www_bget?ath:AT3G01440
Gene.63199::c143851.graph_c0::g.63199::m.63199	ath:AT1G20020|FNR2|http://www.genome.jp/dbget-bin/www_bget?ath:AT1G20020
Gene.65245::c144363.graph_c0::g.65245::m.65245	ath:AT4G05180|PSBQ-2|http://www.genome.jp/dbget-bin/www_bget?ath:AT4G05180
Gene.65247::c144363.graph_c1::g.65247::m.65247	ath:AT4G05180|PSBQ-2|http://www.genome.jp/dbget-bin/www_bget?ath:AT4G05180
Gene.66457::c144706.graph_c0::g.66457::m.66457	ath:AT1G03600|PSB27|http://www.genome.jp/dbget-bin/www_bget?ath:AT1G03600
Gene.73602::c146373.graph_c1::g.73602::m.73602	ath:AT4G12800|PSAL|http://www.genome.jp/dbget-bin/www_bget?ath:AT4G12800
Gene.98711::c151316.graph_c0::g.98711::m.98711	ath:AT1G08380|PSAO|http://www.genome.jp/dbget-bin/www_bget?ath:AT1G08380
Gene.109624::c153113.graph_c0::g.109624::m.109624	None
Gene.112417::c153566.graph_c2::g.112417::m.112417	None
Gene.128746::c155905.graph_c0::g.128746::m.128746	None
Gene.136467::c156782.graph_c0::g.136467::m.136467	ath:AT1G24090||http://www.genome.jp/dbget-bin/www_bget?ath:AT1G24090
Gene.136733::c156822.graph_c0::g.136733::m.136733	ath:AT1G55670|PSAG|http://www.genome.jp/dbget-bin/www_bget?ath:AT1G55670
Gene.167723::c84664.graph_c0::g.167723::m.167723	ath:AT3G50820|PSBO2|http://www.genome.jp/dbget-bin/www_bget?ath:AT3G50820
Gene.170310::c88675.graph_c0::g.170310::m.170310	ath:AT1G76100|PETE1|http://www.genome.jp/dbget-bin/www_bget?ath:AT1G76100
Gene.171459::c89476.graph_c0::g.171459::m.171459	ath:AT1G03130|PSAD-2|http://www.genome.jp/dbget-bin/www_bget?ath:AT1G03130
Gene.1990::c104696.graph_c0::g.1990::m.1990	ath:AT4G12800|PSAL|http://www.genome.jp/dbget-bin/www_bget?ath:AT4G12800
Gene.4478::c108091.graph_c0::g.4478::m.4478	ath:AT1G06680|PSBP-1|http://www.genome.jp/dbget-bin/www_bget?ath:AT1G06680
Gene.4570::c108191.graph_c0::g.4570::m.4570	ath:AT1G76100|PETE1|http://www.genome.jp/dbget-bin/www_bget?ath:AT1G76100
Gene.14751::c120352.graph_c0::g.14751::m.14751	ath:AT1G03130|PSAD-2|http://www.genome.jp/dbget-bin/www_bget?ath:AT1G03130
Gene.14825::c120425.graph_c0::g.14825::m.14825	None
Gene.22959::c126837.graph_c0::g.22959::m.22959	ath:AT1G67740|PSBY|http://www.genome.jp/dbget-bin/www_bget?ath:AT1G67740
Gene.26016::c128922.graph_c1::g.26016::m.26016	ath:AT1G31330|PSAF|http://www.genome.jp/dbget-bin/www_bget?ath:AT1G31330
Gene.27754::c129987.graph_c0::g.27754::m.27754	ath:AT1G31330|PSAF|http://www.genome.jp/dbget-bin/www_bget?ath:AT1G31330
Gene.31818::c132262.graph_c0::g.31818::m.31818	ath:AT3G55330|PPL1|http://www.genome.jp/dbget-bin/www_bget?ath:AT3G55330
Gene.44794::c138103.graph_c0::g.44794::m.44794	ath:AT4G09650|ATPD|http://www.genome.jp/dbget-bin/www_bget?ath:AT4G09650
Gene.55934::c141853.graph_c0::g.55934::m.55934	ath:AT2G39470|PnsL1|http://www.genome.jp/dbget-bin/www_bget?ath:AT2G39470
Gene.81610::c148095.graph_c0::g.81610::m.81610	ath:AT4G04640|ATPC1|http://www.genome.jp/dbget-bin/www_bget?ath:AT4G04640
Gene.107046::c152697.graph_c0::g.107046::m.107046	ath:ArthCp049|psbB|http://www.genome.jp/dbget-bin/www_bget?ath:ArthCp049
Gene.136726::c156813.graph_c0::g.136726::m.136726	None
Gene.136782::c156836.graph_c0::g.136782::m.136782	ath:AT4G03280|PETC|http://www.genome.jp/dbget-bin/www_bget?ath:AT4G03280
Gene.136812::c156846.graph_c0::g.136812::m.136812	ath:AT1G08380|PSAO|http://www.genome.jp/dbget-bin/www_bget?ath:AT1G08380
Gene.136827::c156852.graph_c0::g.136827::m.136827	ath:AT4G21280|PSBQA|http://www.genome.jp/dbget-bin/www_bget?ath:AT4G21280
Gene.137008::c156901.graph_c0::g.137008::m.137008	ath:AT1G30380|PSAK|http://www.genome.jp/dbget-bin/www_bget?ath:AT1G30380
Gene.137196::c156950.graph_c0::g.137196::m.137196	ath:AT5G66190|FNR1|http://www.genome.jp/dbget-bin/www_bget?ath:AT5G66190
Gene.137490::c157048.graph_c0::g.137490::m.137490	ath:AT3G50820|PSBO2|http://www.genome.jp/dbget-bin/www_bget?ath:AT3G50820
Gene.137797::c157132.graph_c0::g.137797::m.137797	ath:AT4G32260|PDE334|http://www.genome.jp/dbget-bin/www_bget?ath:AT4G32260
Gene.152147::c26159.graph_c0::g.152147::m.152147	ath:AT1G44575|NPQ4|http://www.genome.jp/dbget-bin/www_bget?ath:AT1G44575
Gene.156263::c37699.graph_c0::g.156263::m.156263	ath:AT1G79040|PSBR|http://www.genome.jp/dbget-bin/www_bget?ath:AT1G79040
Gene.157777::c47950.graph_c0::g.157777::m.157777	ath:AT1G67740|PSBY|http://www.genome.jp/dbget-bin/www_bget?ath:AT1G67740
Gene.159499::c55896.graph_c0::g.159499::m.159499	ath:AT1G60950|FED_A|http://www.genome.jp/dbget-bin/www_bget?ath:AT1G60950
Gene.163760::c68327.graph_c0::g.163760::m.163760	ath:AT5G64040|PSAN|http://www.genome.jp/dbget-bin/www_bget?ath:AT5G64040
Gene.113716::c153759.graph_c0::g.113716::m.113716	ath:AT2G27510|FD3|http://www.genome.jp/dbget-bin/www_bget?ath:AT2G27510
Gene.2702::c105617.graph_c0::g.2702::m.2702	None
Gene.26368::c129109.graph_c0::g.26368::m.26368	ath:AT1G79040|PSBR|http://www.genome.jp/dbget-bin/www_bget?ath:AT1G79040
Gene.63253::c143865.graph_c0::g.63253::m.63253	ath:AT1G20020|FNR2|http://www.genome.jp/dbget-bin/www_bget?ath:AT1G20020
Gene.74368::c146541.graph_c0::g.74368::m.74368	ath:AT1G15700|ATPC2|http://www.genome.jp/dbget-bin/www_bget?ath:AT1G15700
Gene.83874::c148557.graph_c2::g.83874::m.83874	ath:ArthCp035|petA|http://www.genome.jp/dbget-bin/www_bget?ath:ArthCp035
Gene.113878::c153788.graph_c0::g.113878::m.113878	ath:AT4G14890|FdC1|http://www.genome.jp/dbget-bin/www_bget?ath:AT4G14890
Gene.175008::c96883.graph_c0::g.175008::m.175008	ath:AT2G20260|PSAE-2|http://www.genome.jp/dbget-bin/www_bget?ath:AT2G20260
Gene.56397::c141956.graph_c0::g.56397::m.56397	ath:AT1G44575|NPQ4|http://www.genome.jp/dbget-bin/www_bget?ath:AT1G44575
GO Terms
////
Query:	Gene.7270::c112266.graph_c0::g.7270::m.7270
Gene:	ath:AT1G52230	PSAH2
Entrez Gene ID:	841653
Pathway:	Photosynthesis	KEGG PATHWAY	ath00195
GO:	molecular_function	Gene Ontology	GO:0003674
	nucleus	Gene Ontology	GO:0005634
	chloroplast	Gene Ontology	GO:0009507
	chloroplast thylakoid	Gene Ontology	GO:0009534
	chloroplast thylakoid membrane	Gene Ontology	GO:0009535
	photosystem I reaction center	Gene Ontology	GO:0009538
	thylakoid	Gene Ontology	GO:0009579
	plastoglobule	Gene Ontology	GO:0010287
GOslim:	intracellular	Gene Ontology Slim	GO:0005622
	nucleus	Gene Ontology Slim	GO:0005634
	thylakoid	Gene Ontology Slim	GO:0009579
	photosynthesis	Gene Ontology Slim	GO:0015979
	organelle	Gene Ontology Slim	GO:0043226
////
Query:	Gene.10768::c115973.graph_c0::g.10768::m.10768
Gene:	ath:AT4G04640	ATPC1
Entrez Gene ID:	825797
Pathway:	Metabolic pathways	KEGG PATHWAY	ath01100
	Photosynthesis	KEGG PATHWAY	ath00195
	Oxidative phosphorylation	KEGG PATHWAY	ath00190
	ATP synthesis	PANTHER	P02721
	superpathway of purine nucleotides de novo biosynthesis I	BioCyc	PWY-841
	adenosine ribonucleotides de novo biosynthesis	BioCyc	PWY-7219
	superpathway of adenosine nucleotides de novo biosynthesis I	BioCyc	PWY-7229
GO:	mitochondrial proton-transporting ATP synthase complex, catalytic sector F(1)	Gene Ontology	GO:0000275
	protein binding	Gene Ontology	GO:0005515
	cytosol	Gene Ontology	GO:0005829
	ATP biosynthetic process	Gene Ontology	GO:0006754
	chloroplast	Gene Ontology	GO:0009507
	chloroplast thylakoid	Gene Ontology	GO:0009534
	chloroplast thylakoid membrane	Gene Ontology	GO:0009535
	chloroplast ATP synthase complex	Gene Ontology	GO:0009544
	thylakoid	Gene Ontology	GO:0009579
	photosynthetic electron transport in photosystem II	Gene Ontology	GO:0009772
	chloroplast envelope	Gene Ontology	GO:0009941
	ATP synthesis coupled proton transport	Gene Ontology	GO:0015986
	enzyme regulator activity	Gene Ontology	GO:0030234
GOslim:	intracellular	Gene Ontology Slim	GO:0005622
	cytoplasm	Gene Ontology Slim	GO:0005737
	cytosol	Gene Ontology Slim	GO:0005829
	thylakoid	Gene Ontology Slim	GO:0009579
	enzyme regulator activity	Gene Ontology Slim	GO:0030234
////
Query:	Gene.12111::c117735.graph_c0::g.12111::m.12111
Gene:	ath:AT2G20260	PSAE-2
Entrez Gene ID:	816545
Pathway:	Metabolic pathways	KEGG PATHWAY	ath01100
	Photosynthesis	KEGG PATHWAY	ath00195
GO:	mitochondrion	Gene Ontology	GO:0005739
	chloroplast	Gene Ontology	GO:0009507
	chloroplast thylakoid	Gene Ontology	GO:0009534
	chloroplast thylakoid membrane	Gene Ontology	GO:0009535
	photosystem I reaction center	Gene Ontology	GO:0009538
	thylakoid	Gene Ontology	GO:0009579
	chloroplast envelope	Gene Ontology	GO:0009941
	plastoglobule	Gene Ontology	GO:0010287
GOslim:	intracellular	Gene Ontology Slim	GO:0005622
	cytoplasm	Gene Ontology Slim	GO:0005737
	mitochondrion	Gene Ontology Slim	GO:0005739
	thylakoid	Gene Ontology Slim	GO:0009579
	photosynthesis	Gene Ontology Slim	GO:0015979
	organelle	Gene Ontology Slim	GO:0043226
////
Query:	Gene.17426::c122800.graph_c0::g.17426::m.17426
Gene:	ath:AT5G64040	PSAN
Entrez Gene ID:	836525
Pathway:	Photosynthesis	KEGG PATHWAY	ath00195
GO:	calmodulin binding	Gene Ontology	GO:0005516
	chloroplast	Gene Ontology	GO:0009507
	photosystem I	Gene Ontology	GO:0009522
	chloroplast thylakoid	Gene Ontology	GO:0009534
	chloroplast thylakoid membrane	Gene Ontology	GO:0009535
	plastid	Gene Ontology	GO:0009536
	chloroplast thylakoid lumen	Gene Ontology	GO:0009543
	thylakoid	Gene Ontology	GO:0009579
	photosynthetic electron transport in photosystem I	Gene Ontology	GO:0009773
	photosynthesis	Gene Ontology	GO:0015979
	chloroplast photosystem I	Gene Ontology	GO:0030093
////
Query:	Gene.21036::c125299.graph_c0::g.21036::m.21036
Gene:	ath:AT1G52230	PSAH2
Entrez Gene ID:	841653
Pathway:	Photosynthesis	KEGG PATHWAY	ath00195
GO:	molecular_function	Gene Ontology	GO:0003674
	nucleus	Gene Ontology	GO:0005634
	chloroplast	Gene Ontology	GO:0009507
	chloroplast thylakoid	Gene Ontology	GO:0009534
	chloroplast thylakoid membrane	Gene Ontology	GO:0009535
	photosystem I reaction center	Gene Ontology	GO:0009538
	thylakoid	Gene Ontology	GO:0009579
	plastoglobule	Gene Ontology	GO:0010287
GOslim:	intracellular	Gene Ontology Slim	GO:0005622
	nucleus	Gene Ontology Slim	GO:0005634
	thylakoid	Gene Ontology Slim	GO:0009579
	photosynthesis	Gene Ontology Slim	GO:0015979
	organelle	Gene Ontology Slim	GO:0043226
////
Query:	Gene.25334::c128391.graph_c0::g.25334::m.25334
Gene:	ath:AT2G30570	PSBW
Entrez Gene ID:	817606
Pathway:	Photosynthesis	KEGG PATHWAY	ath00195
GO:	molecular_function	Gene Ontology	GO:0003674
	chloroplast	Gene Ontology	GO:0009507
	chloroplast thylakoid membrane	Gene Ontology	GO:0009535
	photosystem II stabilization	Gene Ontology	GO:0042549
GOslim:	photosynthesis	Gene Ontology Slim	GO:0015979
////
Query:	Gene.33841::c133341.graph_c0::g.33841::m.33841
Gene:	ath:AT1G06680	PSBP-1
Entrez Gene ID:	837178
Pathway:	Photosynthesis	KEGG PATHWAY	ath00195
GO:	mRNA binding	Gene Ontology	GO:0003729
	calcium ion binding	Gene Ontology	GO:0005509
	extracellular region	Gene Ontology	GO:0005576
	poly(U) RNA binding	Gene Ontology	GO:0008266
	chloroplast	Gene Ontology	GO:0009507
	chloroplast thylakoid	Gene Ontology	GO:0009534
	chloroplast thylakoid membrane	Gene Ontology	GO:0009535
	chloroplast thylakoid lumen	Gene Ontology	GO:0009543
	chloroplast stroma	Gene Ontology	GO:0009570
	thylakoid	Gene Ontology	GO:0009579
	photosystem II oxygen evolving complex	Gene Ontology	GO:0009654
	chloroplast envelope	Gene Ontology	GO:0009941
	photosynthesis, light reaction	Gene Ontology	GO:0019684
	extrinsic component of membrane	Gene Ontology	GO:0019898
	thylakoid lumen	Gene Ontology	GO:0031977
	defense response to bacterium	Gene Ontology	GO:0042742
	apoplast	Gene Ontology	GO:0048046
GOslim:	extracellular region	Gene Ontology Slim	GO:0005576
	intracellular	Gene Ontology Slim	GO:0005622
	thylakoid	Gene Ontology Slim	GO:0009579
////
Query:	Gene.41390::c136752.graph_c0::g.41390::m.41390
Gene:	ath:AT1G30380	PSAK
Entrez Gene ID:	839918
Pathway:	Photosynthesis	KEGG PATHWAY	ath00195
GO:	nucleus	Gene Ontology	GO:0005634
	chloroplast	Gene Ontology	GO:0009507
	chloroplast thylakoid	Gene Ontology	GO:0009534
	chloroplast thylakoid membrane	Gene Ontology	GO:0009535
	thylakoid	Gene Ontology	GO:0009579
GOslim:	intracellular	Gene Ontology Slim	GO:0005622
	nucleus	Gene Ontology Slim	GO:0005634
	thylakoid	Gene Ontology Slim	GO:0009579
	photosynthesis	Gene Ontology Slim	GO:0015979
	organelle	Gene Ontology Slim	GO:0043226
////
Query:	Gene.44951::c138171.graph_c1::g.44951::m.44951
Gene:	ath:AT5G66570	PSBO1
Entrez Gene ID:	836789
Pathway:	Photosynthesis	KEGG PATHWAY	ath00195
GO:	mRNA binding	Gene Ontology	GO:0003729
	protein binding	Gene Ontology	GO:0005515
	poly(U) RNA binding	Gene Ontology	GO:0008266
	chloroplast	Gene Ontology	GO:0009507
	chloroplast thylakoid	Gene Ontology	GO:0009534
	chloroplast thylakoid membrane	Gene Ontology	GO:0009535
	plastid	Gene Ontology	GO:0009536
	chloroplast thylakoid lumen	Gene Ontology	GO:0009543
	chloroplast stroma	Gene Ontology	GO:0009570
	thylakoid	Gene Ontology	GO:0009579
	photosystem II oxygen evolving complex	Gene Ontology	GO:0009654
	photoinhibition	Gene Ontology	GO:0010205
	photosystem II assembly	Gene Ontology	GO:0010207
	oxygen evolving activity	Gene Ontology	GO:0010242
	plastoglobule	Gene Ontology	GO:0010287
	photosynthesis, light reaction	Gene Ontology	GO:0019684
	thylakoid lumen	Gene Ontology	GO:0031977
	regulation of protein dephosphorylation	Gene Ontology	GO:0035304
	photosystem II stabilization	Gene Ontology	GO:0042549
	defense response to bacterium	Gene Ontology	GO:0042742
	apoplast	Gene Ontology	GO:0048046
	plastid thylakoid membrane	Gene Ontology	GO:0055035
GOslim:	intracellular	Gene Ontology Slim	GO:0005622
	cytoplasm	Gene Ontology Slim	GO:0005737
	plastid	Gene Ontology Slim	GO:0009536
	thylakoid	Gene Ontology Slim	GO:0009579
	organelle	Gene Ontology Slim	GO:0043226
////
Query:	Gene.45470::c138372.graph_c0::g.45470::m.45470
Gene:	ath:AT1G67740	PSBY
Entrez Gene ID:	843099
Pathway:	Photosynthesis	KEGG PATHWAY	ath00195
GO:	chloroplast	Gene Ontology	GO:0009507
	photosystem II	Gene Ontology	GO:0009523
	chloroplast stromal thylakoid	Gene Ontology	GO:0009533
	chloroplast thylakoid	Gene Ontology	GO:0009534
	chloroplast thylakoid membrane	Gene Ontology	GO:0009535
	photoinhibition	Gene Ontology	GO:0010205
	photosynthesis	Gene Ontology	GO:0015979
	manganese ion binding	Gene Ontology	GO:0030145
	cell redox homeostasis	Gene Ontology	GO:0045454
GOslim:	photosynthesis	Gene Ontology Slim	GO:0015979
////
Query:	Gene.50827::c140248.graph_c0::g.50827::m.50827
////
Query:	Gene.51011::c140309.graph_c0::g.51011::m.51011
Gene:	ath:AT2G30570	PSBW
Entrez Gene ID:	817606
Pathway:	Photosynthesis	KEGG PATHWAY	ath00195
GO:	molecular_function	Gene Ontology	GO:0003674
	chloroplast	Gene Ontology	GO:0009507
	chloroplast thylakoid membrane	Gene Ontology	GO:0009535
	photosystem II stabilization	Gene Ontology	GO:0042549
GOslim:	photosynthesis	Gene Ontology Slim	GO:0015979
////
Query:	Gene.51763::c140550.graph_c0::g.51763::m.51763
Gene:	ath:AT1G55670	PSAG
Entrez Gene ID:	842016
Pathway:	Photosynthesis	KEGG PATHWAY	ath00195
GO:	nucleus	Gene Ontology	GO:0005634
	chloroplast	Gene Ontology	GO:0009507
	chloroplast thylakoid	Gene Ontology	GO:0009534
	chloroplast thylakoid membrane	Gene Ontology	GO:0009535
	thylakoid	Gene Ontology	GO:0009579
	photosynthetic electron transport in photosystem I	Gene Ontology	GO:0009773
	photosynthetic NADP+ reduction	Gene Ontology	GO:0009780
	chloroplast envelope	Gene Ontology	GO:0009941
	photosynthesis	Gene Ontology	GO:0015979
	chloroplast photosystem I	Gene Ontology	GO:0030093
	photosystem I stabilization	Gene Ontology	GO:0042550
	protein stabilization	Gene Ontology	GO:0050821
GOslim:	intracellular	Gene Ontology Slim	GO:0005622
	nucleus	Gene Ontology Slim	GO:0005634
	thylakoid	Gene Ontology Slim	GO:0009579
	photosynthesis	Gene Ontology Slim	GO:0015979
	organelle	Gene Ontology Slim	GO:0043226
////
Query:	Gene.51923::c140598.graph_c0::g.51923::m.51923
Gene:	ath:AT1G52230	PSAH2
Entrez Gene ID:	841653
Pathway:	Photosynthesis	KEGG PATHWAY	ath00195
GO:	molecular_function	Gene Ontology	GO:0003674
	nucleus	Gene Ontology	GO:0005634
	chloroplast	Gene Ontology	GO:0009507
	chloroplast thylakoid	Gene Ontology	GO:0009534
	chloroplast thylakoid membrane	Gene Ontology	GO:0009535
	photosystem I reaction center	Gene Ontology	GO:0009538
	thylakoid	Gene Ontology	GO:0009579
	plastoglobule	Gene Ontology	GO:0010287
GOslim:	intracellular	Gene Ontology Slim	GO:0005622
	nucleus	Gene Ontology Slim	GO:0005634
	thylakoid	Gene Ontology Slim	GO:0009579
	photosynthesis	Gene Ontology Slim	GO:0015979
	organelle	Gene Ontology Slim	GO:0043226
////
Query:	Gene.55751::c141810.graph_c0::g.55751::m.55751
Gene:	ath:AT2G19740
Entrez Gene ID:	816493
Pathway:	Ribosome	KEGG PATHWAY	ath03010
GO:	cytoplasmic translation	Gene Ontology	GO:0002181
	mRNA binding	Gene Ontology	GO:0003729
	structural constituent of ribosome	Gene Ontology	GO:0003735
	cytoplasm	Gene Ontology	GO:0005737
	plasma membrane	Gene Ontology	GO:0005886
	chloroplast	Gene Ontology	GO:0009507
	cytosolic large ribosomal subunit	Gene Ontology	GO:0022625
	cytosolic ribosome	Gene Ontology	GO:0022626
GOslim:	structural constituent of ribosome	Gene Ontology Slim	GO:0003735
	structural molecule activity	Gene Ontology Slim	GO:0005198
	intracellular	Gene Ontology Slim	GO:0005622
	cytoplasm	Gene Ontology Slim	GO:0005737
	plasma membrane	Gene Ontology Slim	GO:0005886
////
Query:	Gene.60253::c143052.graph_c0::g.60253::m.60253
Gene:	ath:AT5G45040	CYTC6A
Entrez Gene ID:	834535
Pathway:	Photosynthesis	KEGG PATHWAY	ath00195
GO:	electron transfer activity	Gene Ontology	GO:0009055
	chloroplast	Gene Ontology	GO:0009507
	heme binding	Gene Ontology	GO:0020037
////
Query:	Gene.60761::c143200.graph_c0::g.60761::m.60761
Gene:	ath:AT3G01440	PnsL3
Entrez Gene ID:	821143
Pathway:	Photosynthesis	KEGG PATHWAY	ath00195
GO:	calcium ion binding	Gene Ontology	GO:0005509
	cytosol	Gene Ontology	GO:0005829
	nitrite reductase complex [NAD(P)H]	Gene Ontology	GO:0009344
	chloroplast	Gene Ontology	GO:0009507
	chloroplast thylakoid	Gene Ontology	GO:0009534
	chloroplast thylakoid membrane	Gene Ontology	GO:0009535
	chloroplast thylakoid lumen	Gene Ontology	GO:0009543
	photosystem II oxygen evolving complex	Gene Ontology	GO:0009654
	photosynthetic electron transport chain	Gene Ontology	GO:0009767
	photosynthesis, light reaction	Gene Ontology	GO:0019684
	extrinsic component of membrane	Gene Ontology	GO:0019898
	electron transporter, transferring electrons within the cyclic electron transport pathway of photosynthesis activity	Gene Ontology	GO:0045156
GOslim:	intracellular	Gene Ontology Slim	GO:0005622
	cytoplasm	Gene Ontology Slim	GO:0005737
	cytosol	Gene Ontology Slim	GO:0005829
////
Query:	Gene.63199::c143851.graph_c0::g.63199::m.63199
Gene:	ath:AT1G20020	FNR2
Entrez Gene ID:	838591
Pathway:	Metabolic pathways	KEGG PATHWAY	ath01100
	Photosynthesis	KEGG PATHWAY	ath00195
	oxygenic photosynthesis	BioCyc	PHOTOALL-PWY
	photosynthesis light reactions	BioCyc	PWY-101
GO:	NADPH dehydrogenase activity	Gene Ontology	GO:0003959
	ferredoxin-NADP+ reductase activity	Gene Ontology	GO:0004324
	nucleus	Gene Ontology	GO:0005634
	cytosol	Gene Ontology	GO:0005829
	poly(U) RNA binding	Gene Ontology	GO:0008266
	chloroplast	Gene Ontology	GO:0009507
	chloroplast thylakoid	Gene Ontology	GO:0009534
	chloroplast thylakoid membrane	Gene Ontology	GO:0009535
	chloroplast stroma	Gene Ontology	GO:0009570
	thylakoid	Gene Ontology	GO:0009579
	defense response to fungus, incompatible interaction	Gene Ontology	GO:0009817
	photosynthesis	Gene Ontology	GO:0015979
	defense response to bacterium	Gene Ontology	GO:0042742
	apoplast	Gene Ontology	GO:0048046
	oxidation-reduction process	Gene Ontology	GO:0055114
	chloroplast thylakoid membrane protein complex	Gene Ontology	GO:0098807
GOslim:	intracellular	Gene Ontology Slim	GO:0005622
	nucleus	Gene Ontology Slim	GO:0005634
	thylakoid	Gene Ontology Slim	GO:0009579
	photosynthesis	Gene Ontology Slim	GO:0015979
	organelle	Gene Ontology Slim	GO:0043226
////
Query:	Gene.65245::c144363.graph_c0::g.65245::m.65245
Gene:	ath:AT4G05180	PSBQ-2
Entrez Gene ID:	825866
Pathway:	Photosynthesis	KEGG PATHWAY	ath00195
GO:	calcium ion binding	Gene Ontology	GO:0005509
	cytosol	Gene Ontology	GO:0005829
	chloroplast	Gene Ontology	GO:0009507
	chloroplast thylakoid	Gene Ontology	GO:0009534
	chloroplast thylakoid membrane	Gene Ontology	GO:0009535
	chloroplast thylakoid lumen	Gene Ontology	GO:0009543
	chloroplast stroma	Gene Ontology	GO:0009570
	thylakoid	Gene Ontology	GO:0009579
	photosystem II oxygen evolving complex	Gene Ontology	GO:0009654
	photosynthetic electron transport chain	Gene Ontology	GO:0009767
	extrinsic component of membrane	Gene Ontology	GO:0019898
	thylakoid lumen	Gene Ontology	GO:0031977
	electron transporter, transferring electrons within the cyclic electron transport pathway of photosynthesis activity	Gene Ontology	GO:0045156
	apoplast	Gene Ontology	GO:0048046
GOslim:	intracellular	Gene Ontology Slim	GO:0005622
	cytoplasm	Gene Ontology Slim	GO:0005737
	cytosol	Gene Ontology Slim	GO:0005829
	thylakoid	Gene Ontology Slim	GO:0009579
////
Query:	Gene.65247::c144363.graph_c1::g.65247::m.65247
Gene:	ath:AT4G05180	PSBQ-2
Entrez Gene ID:	825866
Pathway:	Photosynthesis	KEGG PATHWAY	ath00195
GO:	calcium ion binding	Gene Ontology	GO:0005509
	cytosol	Gene Ontology	GO:0005829
	chloroplast	Gene Ontology	GO:0009507
	chloroplast thylakoid	Gene Ontology	GO:0009534
	chloroplast thylakoid membrane	Gene Ontology	GO:0009535
	chloroplast thylakoid lumen	Gene Ontology	GO:0009543
	chloroplast stroma	Gene Ontology	GO:0009570
	thylakoid	Gene Ontology	GO:0009579
	photosystem II oxygen evolving complex	Gene Ontology	GO:0009654
	photosynthetic electron transport chain	Gene Ontology	GO:0009767
	extrinsic component of membrane	Gene Ontology	GO:0019898
	thylakoid lumen	Gene Ontology	GO:0031977
	electron transporter, transferring electrons within the cyclic electron transport pathway of photosynthesis activity	Gene Ontology	GO:0045156
	apoplast	Gene Ontology	GO:0048046
GOslim:	intracellular	Gene Ontology Slim	GO:0005622
	cytoplasm	Gene Ontology Slim	GO:0005737
	cytosol	Gene Ontology Slim	GO:0005829
	thylakoid	Gene Ontology Slim	GO:0009579
////
Query:	Gene.66457::c144706.graph_c0::g.66457::m.66457
Gene:	ath:AT1G03600	PSB27
Entrez Gene ID:	839449
Pathway:	Photosynthesis	KEGG PATHWAY	ath00195
GO:	extracellular region	Gene Ontology	GO:0005576
	chloroplast	Gene Ontology	GO:0009507
	chloroplast thylakoid	Gene Ontology	GO:0009534
	chloroplast thylakoid membrane	Gene Ontology	GO:0009535
	chloroplast thylakoid lumen	Gene Ontology	GO:0009543
	thylakoid	Gene Ontology	GO:0009579
	photosystem II repair	Gene Ontology	GO:0010206
	photosystem II assembly	Gene Ontology	GO:0010207
	cellular response to light intensity	Gene Ontology	GO:0071484
GOslim:	extracellular region	Gene Ontology Slim	GO:0005576
	intracellular	Gene Ontology Slim	GO:0005622
	thylakoid	Gene Ontology Slim	GO:0009579
////
Query:	Gene.73602::c146373.graph_c1::g.73602::m.73602
Gene:	ath:AT4G12800	PSAL
Entrez Gene ID:	826892
Pathway:	Photosynthesis	KEGG PATHWAY	ath00195
GO:	mRNA binding	Gene Ontology	GO:0003729
	protein binding	Gene Ontology	GO:0005515
	cytosol	Gene Ontology	GO:0005829
	chloroplast	Gene Ontology	GO:0009507
	chloroplast thylakoid	Gene Ontology	GO:0009534
	chloroplast thylakoid membrane	Gene Ontology	GO:0009535
	photosystem I reaction center	Gene Ontology	GO:0009538
	thylakoid	Gene Ontology	GO:0009579
	chloroplast envelope	Gene Ontology	GO:0009941
	plastoglobule	Gene Ontology	GO:0010287
	photosynthesis	Gene Ontology	GO:0015979
GOslim:	intracellular	Gene Ontology Slim	GO:0005622
	cytoplasm	Gene Ontology Slim	GO:0005737
	cytosol	Gene Ontology Slim	GO:0005829
	thylakoid	Gene Ontology Slim	GO:0009579
	photosynthesis	Gene Ontology Slim	GO:0015979
////
Query:	Gene.98711::c151316.graph_c0::g.98711::m.98711
Gene:	ath:AT1G08380	PSAO
Entrez Gene ID:	837358
Pathway:	Photosynthesis	KEGG PATHWAY	ath00195
GO:	mRNA binding	Gene Ontology	GO:0003729
	protein binding	Gene Ontology	GO:0005515
	extracellular region	Gene Ontology	GO:0005576
	mitochondrion	Gene Ontology	GO:0005739
	chloroplast	Gene Ontology	GO:0009507
	photosystem I	Gene Ontology	GO:0009522
	thylakoid	Gene Ontology	GO:0009579
	photosynthetic electron transport chain	Gene Ontology	GO:0009767
	photosynthesis, light harvesting in photosystem I	Gene Ontology	GO:0009768
GOslim:	extracellular region	Gene Ontology Slim	GO:0005576
	intracellular	Gene Ontology Slim	GO:0005622
	cytoplasm	Gene Ontology Slim	GO:0005737
	mitochondrion	Gene Ontology Slim	GO:0005739
	thylakoid	Gene Ontology Slim	GO:0009579
	organelle	Gene Ontology Slim	GO:0043226
////
Query:	Gene.109624::c153113.graph_c0::g.109624::m.109624
////
Query:	Gene.112417::c153566.graph_c2::g.112417::m.112417
////
Query:	Gene.128746::c155905.graph_c0::g.128746::m.128746
////
Query:	Gene.136467::c156782.graph_c0::g.136467::m.136467
Gene:	ath:AT1G24090
Entrez Gene ID:	839020
////
Query:	Gene.136733::c156822.graph_c0::g.136733::m.136733
Gene:	ath:AT1G55670	PSAG
Entrez Gene ID:	842016
Pathway:	Photosynthesis	KEGG PATHWAY	ath00195
GO:	nucleus	Gene Ontology	GO:0005634
	chloroplast	Gene Ontology	GO:0009507
	chloroplast thylakoid	Gene Ontology	GO:0009534
	chloroplast thylakoid membrane	Gene Ontology	GO:0009535
	thylakoid	Gene Ontology	GO:0009579
	photosynthetic electron transport in photosystem I	Gene Ontology	GO:0009773
	photosynthetic NADP+ reduction	Gene Ontology	GO:0009780
	chloroplast envelope	Gene Ontology	GO:0009941
	photosynthesis	Gene Ontology	GO:0015979
	chloroplast photosystem I	Gene Ontology	GO:0030093
	photosystem I stabilization	Gene Ontology	GO:0042550
	protein stabilization	Gene Ontology	GO:0050821
GOslim:	intracellular	Gene Ontology Slim	GO:0005622
	nucleus	Gene Ontology Slim	GO:0005634
	thylakoid	Gene Ontology Slim	GO:0009579
	photosynthesis	Gene Ontology Slim	GO:0015979
	organelle	Gene Ontology Slim	GO:0043226
////
Query:	Gene.167723::c84664.graph_c0::g.167723::m.167723
Gene:	ath:AT3G50820	PSBO2
Entrez Gene ID:	824246
Pathway:	Photosynthesis	KEGG PATHWAY	ath00195
GO:	mRNA binding	Gene Ontology	GO:0003729
	protein binding	Gene Ontology	GO:0005515
	cytosol	Gene Ontology	GO:0005829
	poly(U) RNA binding	Gene Ontology	GO:0008266
	chloroplast	Gene Ontology	GO:0009507
	chloroplast thylakoid	Gene Ontology	GO:0009534
	chloroplast thylakoid membrane	Gene Ontology	GO:0009535
	chloroplast thylakoid lumen	Gene Ontology	GO:0009543
	chloroplast stroma	Gene Ontology	GO:0009570
	thylakoid	Gene Ontology	GO:0009579
	photosystem II oxygen evolving complex	Gene Ontology	GO:0009654
	photoinhibition	Gene Ontology	GO:0010205
	photosystem II assembly	Gene Ontology	GO:0010207
	oxygen evolving activity	Gene Ontology	GO:0010242
	plastoglobule	Gene Ontology	GO:0010287
	photosynthesis, light reaction	Gene Ontology	GO:0019684
	thylakoid lumen	Gene Ontology	GO:0031977
	regulation of protein dephosphorylation	Gene Ontology	GO:0035304
	photosystem II stabilization	Gene Ontology	GO:0042549
GOslim:	intracellular	Gene Ontology Slim	GO:0005622
	cytoplasm	Gene Ontology Slim	GO:0005737
	cytosol	Gene Ontology Slim	GO:0005829
	thylakoid	Gene Ontology Slim	GO:0009579
////
Query:	Gene.170310::c88675.graph_c0::g.170310::m.170310
Gene:	ath:AT1G76100	PETE1
Entrez Gene ID:	843942
Pathway:	Photosynthesis	KEGG PATHWAY	ath00195
GO:	copper ion binding	Gene Ontology	GO:0005507
	mitochondrion	Gene Ontology	GO:0005739
	electron transfer activity	Gene Ontology	GO:0009055
	chloroplast	Gene Ontology	GO:0009507
	chloroplast thylakoid lumen	Gene Ontology	GO:0009543
	thylakoid	Gene Ontology	GO:0009579
	thylakoid lumen	Gene Ontology	GO:0031977
	response to copper ion	Gene Ontology	GO:0046688
GOslim:	intracellular	Gene Ontology Slim	GO:0005622
	cytoplasm	Gene Ontology Slim	GO:0005737
	mitochondrion	Gene Ontology Slim	GO:0005739
	thylakoid	Gene Ontology Slim	GO:0009579
	organelle	Gene Ontology Slim	GO:0043226
////
Query:	Gene.171459::c89476.graph_c0::g.171459::m.171459
Gene:	ath:AT1G03130	PSAD-2
Entrez Gene ID:	838400
Pathway:	Metabolic pathways	KEGG PATHWAY	ath01100
	Photosynthesis	KEGG PATHWAY	ath00195
GO:	mRNA binding	Gene Ontology	GO:0003729
	extracellular region	Gene Ontology	GO:0005576
	chloroplast	Gene Ontology	GO:0009507
	chloroplast thylakoid	Gene Ontology	GO:0009534
	chloroplast thylakoid membrane	Gene Ontology	GO:0009535
	photosystem I reaction center	Gene Ontology	GO:0009538
	thylakoid	Gene Ontology	GO:0009579
	chloroplast envelope	Gene Ontology	GO:0009941
GOslim:	extracellular region	Gene Ontology Slim	GO:0005576
	intracellular	Gene Ontology Slim	GO:0005622
	thylakoid	Gene Ontology Slim	GO:0009579
	photosynthesis	Gene Ontology Slim	GO:0015979
////
Query:	Gene.1990::c104696.graph_c0::g.1990::m.1990
Gene:	ath:AT4G12800	PSAL
Entrez Gene ID:	826892
Pathway:	Photosynthesis	KEGG PATHWAY	ath00195
GO:	mRNA binding	Gene Ontology	GO:0003729
	protein binding	Gene Ontology	GO:0005515
	cytosol	Gene Ontology	GO:0005829
	chloroplast	Gene Ontology	GO:0009507
	chloroplast thylakoid	Gene Ontology	GO:0009534
	chloroplast thylakoid membrane	Gene Ontology	GO:0009535
	photosystem I reaction center	Gene Ontology	GO:0009538
	thylakoid	Gene Ontology	GO:0009579
	chloroplast envelope	Gene Ontology	GO:0009941
	plastoglobule	Gene Ontology	GO:0010287
	photosynthesis	Gene Ontology	GO:0015979
GOslim:	intracellular	Gene Ontology Slim	GO:0005622
	cytoplasm	Gene Ontology Slim	GO:0005737
	cytosol	Gene Ontology Slim	GO:0005829
	thylakoid	Gene Ontology Slim	GO:0009579
	photosynthesis	Gene Ontology Slim	GO:0015979
////
Query:	Gene.4478::c108091.graph_c0::g.4478::m.4478
Gene:	ath:AT1G06680	PSBP-1
Entrez Gene ID:	837178
Pathway:	Photosynthesis	KEGG PATHWAY	ath00195
GO:	mRNA binding	Gene Ontology	GO:0003729
	calcium ion binding	Gene Ontology	GO:0005509
	extracellular region	Gene Ontology	GO:0005576
	poly(U) RNA binding	Gene Ontology	GO:0008266
	chloroplast	Gene Ontology	GO:0009507
	chloroplast thylakoid	Gene Ontology	GO:0009534
	chloroplast thylakoid membrane	Gene Ontology	GO:0009535
	chloroplast thylakoid lumen	Gene Ontology	GO:0009543
	chloroplast stroma	Gene Ontology	GO:0009570
	thylakoid	Gene Ontology	GO:0009579
	photosystem II oxygen evolving complex	Gene Ontology	GO:0009654
	chloroplast envelope	Gene Ontology	GO:0009941
	photosynthesis, light reaction	Gene Ontology	GO:0019684
	extrinsic component of membrane	Gene Ontology	GO:0019898
	thylakoid lumen	Gene Ontology	GO:0031977
	defense response to bacterium	Gene Ontology	GO:0042742
	apoplast	Gene Ontology	GO:0048046
GOslim:	extracellular region	Gene Ontology Slim	GO:0005576
	intracellular	Gene Ontology Slim	GO:0005622
	thylakoid	Gene Ontology Slim	GO:0009579
////
Query:	Gene.4570::c108191.graph_c0::g.4570::m.4570
Gene:	ath:AT1G76100	PETE1
Entrez Gene ID:	843942
Pathway:	Photosynthesis	KEGG PATHWAY	ath00195
GO:	copper ion binding	Gene Ontology	GO:0005507
	mitochondrion	Gene Ontology	GO:0005739
	electron transfer activity	Gene Ontology	GO:0009055
	chloroplast	Gene Ontology	GO:0009507
	chloroplast thylakoid lumen	Gene Ontology	GO:0009543
	thylakoid	Gene Ontology	GO:0009579
	thylakoid lumen	Gene Ontology	GO:0031977
	response to copper ion	Gene Ontology	GO:0046688
GOslim:	intracellular	Gene Ontology Slim	GO:0005622
	cytoplasm	Gene Ontology Slim	GO:0005737
	mitochondrion	Gene Ontology Slim	GO:0005739
	thylakoid	Gene Ontology Slim	GO:0009579
	organelle	Gene Ontology Slim	GO:0043226
////
Query:	Gene.14751::c120352.graph_c0::g.14751::m.14751
Gene:	ath:AT1G03130	PSAD-2
Entrez Gene ID:	838400
Pathway:	Metabolic pathways	KEGG PATHWAY	ath01100
	Photosynthesis	KEGG PATHWAY	ath00195
GO:	mRNA binding	Gene Ontology	GO:0003729
	extracellular region	Gene Ontology	GO:0005576
	chloroplast	Gene Ontology	GO:0009507
	chloroplast thylakoid	Gene Ontology	GO:0009534
	chloroplast thylakoid membrane	Gene Ontology	GO:0009535
	photosystem I reaction center	Gene Ontology	GO:0009538
	thylakoid	Gene Ontology	GO:0009579
	chloroplast envelope	Gene Ontology	GO:0009941
GOslim:	extracellular region	Gene Ontology Slim	GO:0005576
	intracellular	Gene Ontology Slim	GO:0005622
	thylakoid	Gene Ontology Slim	GO:0009579
	photosynthesis	Gene Ontology Slim	GO:0015979
////
Query:	Gene.14825::c120425.graph_c0::g.14825::m.14825
////
Query:	Gene.22959::c126837.graph_c0::g.22959::m.22959
Gene:	ath:AT1G67740	PSBY
Entrez Gene ID:	843099
Pathway:	Photosynthesis	KEGG PATHWAY	ath00195
GO:	chloroplast	Gene Ontology	GO:0009507
	photosystem II	Gene Ontology	GO:0009523
	chloroplast stromal thylakoid	Gene Ontology	GO:0009533
	chloroplast thylakoid	Gene Ontology	GO:0009534
	chloroplast thylakoid membrane	Gene Ontology	GO:0009535
	photoinhibition	Gene Ontology	GO:0010205
	photosynthesis	Gene Ontology	GO:0015979
	manganese ion binding	Gene Ontology	GO:0030145
	cell redox homeostasis	Gene Ontology	GO:0045454
GOslim:	photosynthesis	Gene Ontology Slim	GO:0015979
////
Query:	Gene.26016::c128922.graph_c1::g.26016::m.26016
Gene:	ath:AT1G31330	PSAF
Entrez Gene ID:	840021
Pathway:	Metabolic pathways	KEGG PATHWAY	ath01100
	Photosynthesis	KEGG PATHWAY	ath00195
GO:	mRNA binding	Gene Ontology	GO:0003729
	nucleus	Gene Ontology	GO:0005634
	chloroplast	Gene Ontology	GO:0009507
	chloroplast thylakoid	Gene Ontology	GO:0009534
	chloroplast thylakoid membrane	Gene Ontology	GO:0009535
	photosystem I reaction center	Gene Ontology	GO:0009538
	thylakoid	Gene Ontology	GO:0009579
	chloroplast envelope	Gene Ontology	GO:0009941
	plastoglobule	Gene Ontology	GO:0010287
GOslim:	intracellular	Gene Ontology Slim	GO:0005622
	nucleus	Gene Ontology Slim	GO:0005634
	thylakoid	Gene Ontology Slim	GO:0009579
	photosynthesis	Gene Ontology Slim	GO:0015979
	organelle	Gene Ontology Slim	GO:0043226
////
Query:	Gene.27754::c129987.graph_c0::g.27754::m.27754
Gene:	ath:AT1G31330	PSAF
Entrez Gene ID:	840021
Pathway:	Metabolic pathways	KEGG PATHWAY	ath01100
	Photosynthesis	KEGG PATHWAY	ath00195
GO:	mRNA binding	Gene Ontology	GO:0003729
	nucleus	Gene Ontology	GO:0005634
	chloroplast	Gene Ontology	GO:0009507
	chloroplast thylakoid	Gene Ontology	GO:0009534
	chloroplast thylakoid membrane	Gene Ontology	GO:0009535
	photosystem I reaction center	Gene Ontology	GO:0009538
	thylakoid	Gene Ontology	GO:0009579
	chloroplast envelope	Gene Ontology	GO:0009941
	plastoglobule	Gene Ontology	GO:0010287
GOslim:	intracellular	Gene Ontology Slim	GO:0005622
	nucleus	Gene Ontology Slim	GO:0005634
	thylakoid	Gene Ontology Slim	GO:0009579
	photosynthesis	Gene Ontology Slim	GO:0015979
	organelle	Gene Ontology Slim	GO:0043226
////
Query:	Gene.31818::c132262.graph_c0::g.31818::m.31818
Gene:	ath:AT3G55330	PPL1
Entrez Gene ID:	824699
Pathway:	Photosynthesis	KEGG PATHWAY	ath00195
GO:	calcium ion binding	Gene Ontology	GO:0005509
	cytosol	Gene Ontology	GO:0005829
	chloroplast	Gene Ontology	GO:0009507
	chloroplast thylakoid lumen	Gene Ontology	GO:0009543
	thylakoid	Gene Ontology	GO:0009579
	photosystem II oxygen evolving complex	Gene Ontology	GO:0009654
	photosynthesis	Gene Ontology	GO:0015979
	extrinsic component of membrane	Gene Ontology	GO:0019898
	thylakoid lumen	Gene Ontology	GO:0031977
	thylakoid membrane	Gene Ontology	GO:0042651
	chloroplast thylakoid membrane protein complex	Gene Ontology	GO:0098807
GOslim:	intracellular	Gene Ontology Slim	GO:0005622
	cytoplasm	Gene Ontology Slim	GO:0005737
	cytosol	Gene Ontology Slim	GO:0005829
	thylakoid	Gene Ontology Slim	GO:0009579
	photosynthesis	Gene Ontology Slim	GO:0015979
////
Query:	Gene.44794::c138103.graph_c0::g.44794::m.44794
Gene:	ath:AT4G09650	ATPD
Entrez Gene ID:	826551
Pathway:	Metabolic pathways	KEGG PATHWAY	ath01100
	Photosynthesis	KEGG PATHWAY	ath00195
	Oxidative phosphorylation	KEGG PATHWAY	ath00190
GO:	mRNA binding	Gene Ontology	GO:0003729
	cytosol	Gene Ontology	GO:0005829
	response to cold	Gene Ontology	GO:0009409
	chloroplast	Gene Ontology	GO:0009507
	chloroplast thylakoid	Gene Ontology	GO:0009534
	chloroplast thylakoid membrane	Gene Ontology	GO:0009535
	thylakoid	Gene Ontology	GO:0009579
	photosynthetic electron transport in photosystem II	Gene Ontology	GO:0009772
	photosynthetic electron transport in photosystem I	Gene Ontology	GO:0009773
	chloroplast envelope	Gene Ontology	GO:0009941
	plastoglobule	Gene Ontology	GO:0010287
	stromule	Gene Ontology	GO:0010319
	photosynthesis	Gene Ontology	GO:0015979
	ATP synthesis coupled proton transport	Gene Ontology	GO:0015986
	defense response to bacterium	Gene Ontology	GO:0042742
	proton-transporting ATP synthase complex, catalytic core F(1)	Gene Ontology	GO:0045261
	proton-transporting ATP synthase activity, rotational mechanism	Gene Ontology	GO:0046933
GOslim:	intracellular	Gene Ontology Slim	GO:0005622
	cytoplasm	Gene Ontology Slim	GO:0005737
	cytosol	Gene Ontology Slim	GO:0005829
	thylakoid	Gene Ontology Slim	GO:0009579
	photosynthesis	Gene Ontology Slim	GO:0015979
////
Query:	Gene.55934::c141853.graph_c0::g.55934::m.55934
Gene:	ath:AT2G39470	PnsL1
Entrez Gene ID:	818532
GO:	calcium ion binding	Gene Ontology	GO:0005509
	chloroplast	Gene Ontology	GO:0009507
	chloroplast thylakoid membrane	Gene Ontology	GO:0009535
	chloroplast thylakoid lumen	Gene Ontology	GO:0009543
	thylakoid	Gene Ontology	GO:0009579
	photosystem II oxygen evolving complex	Gene Ontology	GO:0009654
	photosynthesis	Gene Ontology	GO:0015979
	extrinsic component of membrane	Gene Ontology	GO:0019898
GOslim:	intracellular	Gene Ontology Slim	GO:0005622
	thylakoid	Gene Ontology Slim	GO:0009579
	photosynthesis	Gene Ontology Slim	GO:0015979
////
Query:	Gene.81610::c148095.graph_c0::g.81610::m.81610
Gene:	ath:AT4G04640	ATPC1
Entrez Gene ID:	825797
Pathway:	Metabolic pathways	KEGG PATHWAY	ath01100
	Photosynthesis	KEGG PATHWAY	ath00195
	Oxidative phosphorylation	KEGG PATHWAY	ath00190
	ATP synthesis	PANTHER	P02721
	superpathway of purine nucleotides de novo biosynthesis I	BioCyc	PWY-841
	adenosine ribonucleotides de novo biosynthesis	BioCyc	PWY-7219
	superpathway of adenosine nucleotides de novo biosynthesis I	BioCyc	PWY-7229
GO:	mitochondrial proton-transporting ATP synthase complex, catalytic sector F(1)	Gene Ontology	GO:0000275
	protein binding	Gene Ontology	GO:0005515
	cytosol	Gene Ontology	GO:0005829
	ATP biosynthetic process	Gene Ontology	GO:0006754
	chloroplast	Gene Ontology	GO:0009507
	chloroplast thylakoid	Gene Ontology	GO:0009534
	chloroplast thylakoid membrane	Gene Ontology	GO:0009535
	chloroplast ATP synthase complex	Gene Ontology	GO:0009544
	thylakoid	Gene Ontology	GO:0009579
	photosynthetic electron transport in photosystem II	Gene Ontology	GO:0009772
	chloroplast envelope	Gene Ontology	GO:0009941
	ATP synthesis coupled proton transport	Gene Ontology	GO:0015986
	enzyme regulator activity	Gene Ontology	GO:0030234
GOslim:	intracellular	Gene Ontology Slim	GO:0005622
	cytoplasm	Gene Ontology Slim	GO:0005737
	cytosol	Gene Ontology Slim	GO:0005829
	thylakoid	Gene Ontology Slim	GO:0009579
	enzyme regulator activity	Gene Ontology Slim	GO:0030234
////
Query:	Gene.107046::c152697.graph_c0::g.107046::m.107046
Gene:	ath:ArthCp049	psbB
Entrez Gene ID:	844733
Pathway:	Metabolic pathways	KEGG PATHWAY	ath01100
	Photosynthesis	KEGG PATHWAY	ath00195
////
Query:	Gene.136726::c156813.graph_c0::g.136726::m.136726
////
Query:	Gene.136782::c156836.graph_c0::g.136782::m.136782
Gene:	ath:AT4G03280	PETC
Entrez Gene ID:	827996
Pathway:	Metabolic pathways	KEGG PATHWAY	ath01100
	Photosynthesis	KEGG PATHWAY	ath00195
	oxygenic photosynthesis	BioCyc	PHOTOALL-PWY
	photosynthesis light reactions	BioCyc	PWY-101
GO:	mRNA binding	Gene Ontology	GO:0003729
	protein binding	Gene Ontology	GO:0005515
	cytosol	Gene Ontology	GO:0005829
	plasma membrane	Gene Ontology	GO:0005886
	chloroplast	Gene Ontology	GO:0009507
	cytochrome b6f complex	Gene Ontology	GO:0009512
	chloroplast thylakoid	Gene Ontology	GO:0009534
	chloroplast thylakoid membrane	Gene Ontology	GO:0009535
	thylakoid	Gene Ontology	GO:0009579
	photosynthetic electron transport chain	Gene Ontology	GO:0009767
	chloroplast envelope	Gene Ontology	GO:0009941
	nonphotochemical quenching	Gene Ontology	GO:0010196
	membrane	Gene Ontology	GO:0016020
	oxidoreductase activity	Gene Ontology	GO:0016491
	defense response to bacterium	Gene Ontology	GO:0042742
	electron transporter, transferring electrons within cytochrome b6/f complex of photosystem II activity	Gene Ontology	GO:0045158
	electron transporter, transferring electrons from cytochrome b6/f complex of photosystem II activity	Gene Ontology	GO:0046028
	response to karrikin	Gene Ontology	GO:0080167
GOslim:	intracellular	Gene Ontology Slim	GO:0005622
	cytoplasm	Gene Ontology Slim	GO:0005737
	cytosol	Gene Ontology Slim	GO:0005829
	plasma membrane	Gene Ontology Slim	GO:0005886
	thylakoid	Gene Ontology Slim	GO:0009579
////
Query:	Gene.136812::c156846.graph_c0::g.136812::m.136812
Gene:	ath:AT1G08380	PSAO
Entrez Gene ID:	837358
Pathway:	Photosynthesis	KEGG PATHWAY	ath00195
GO:	mRNA binding	Gene Ontology	GO:0003729
	protein binding	Gene Ontology	GO:0005515
	extracellular region	Gene Ontology	GO:0005576
	mitochondrion	Gene Ontology	GO:0005739
	chloroplast	Gene Ontology	GO:0009507
	photosystem I	Gene Ontology	GO:0009522
	thylakoid	Gene Ontology	GO:0009579
	photosynthetic electron transport chain	Gene Ontology	GO:0009767
	photosynthesis, light harvesting in photosystem I	Gene Ontology	GO:0009768
GOslim:	extracellular region	Gene Ontology Slim	GO:0005576
	intracellular	Gene Ontology Slim	GO:0005622
	cytoplasm	Gene Ontology Slim	GO:0005737
	mitochondrion	Gene Ontology Slim	GO:0005739
	thylakoid	Gene Ontology Slim	GO:0009579
	organelle	Gene Ontology Slim	GO:0043226
////
Query:	Gene.136827::c156852.graph_c0::g.136827::m.136827
Gene:	ath:AT4G21280	PSBQA
Entrez Gene ID:	827877
Pathway:	Photosynthesis	KEGG PATHWAY	ath00195
GO:	mRNA binding	Gene Ontology	GO:0003729
	calcium ion binding	Gene Ontology	GO:0005509
	cytosol	Gene Ontology	GO:0005829
	chloroplast	Gene Ontology	GO:0009507
	chloroplast thylakoid	Gene Ontology	GO:0009534
	chloroplast thylakoid membrane	Gene Ontology	GO:0009535
	chloroplast thylakoid lumen	Gene Ontology	GO:0009543
	chloroplast stroma	Gene Ontology	GO:0009570
	thylakoid	Gene Ontology	GO:0009579
	photosystem II oxygen evolving complex	Gene Ontology	GO:0009654
	photosynthetic electron transport chain	Gene Ontology	GO:0009767
	extrinsic component of membrane	Gene Ontology	GO:0019898
	thylakoid lumen	Gene Ontology	GO:0031977
	electron transporter, transferring electrons within the cyclic electron transport pathway of photosynthesis activity	Gene Ontology	GO:0045156
GOslim:	intracellular	Gene Ontology Slim	GO:0005622
	cytoplasm	Gene Ontology Slim	GO:0005737
	cytosol	Gene Ontology Slim	GO:0005829
	thylakoid	Gene Ontology Slim	GO:0009579
////
Query:	Gene.137008::c156901.graph_c0::g.137008::m.137008
Gene:	ath:AT1G30380	PSAK
Entrez Gene ID:	839918
Pathway:	Photosynthesis	KEGG PATHWAY	ath00195
GO:	nucleus	Gene Ontology	GO:0005634
	chloroplast	Gene Ontology	GO:0009507
	chloroplast thylakoid	Gene Ontology	GO:0009534
	chloroplast thylakoid membrane	Gene Ontology	GO:0009535
	thylakoid	Gene Ontology	GO:0009579
GOslim:	intracellular	Gene Ontology Slim	GO:0005622
	nucleus	Gene Ontology Slim	GO:0005634
	thylakoid	Gene Ontology Slim	GO:0009579
	photosynthesis	Gene Ontology Slim	GO:0015979
	organelle	Gene Ontology Slim	GO:0043226
////
Query:	Gene.137196::c156950.graph_c0::g.137196::m.137196
Gene:	ath:AT5G66190	FNR1
Entrez Gene ID:	836751
Pathway:	Metabolic pathways	KEGG PATHWAY	ath01100
	Photosynthesis	KEGG PATHWAY	ath00195
	oxygenic photosynthesis	BioCyc	PHOTOALL-PWY
	photosynthesis light reactions	BioCyc	PWY-101
GO:	NADPH dehydrogenase activity	Gene Ontology	GO:0003959
	ferredoxin-NADP+ reductase activity	Gene Ontology	GO:0004324
	poly(U) RNA binding	Gene Ontology	GO:0008266
	chloroplast	Gene Ontology	GO:0009507
	chloroplast thylakoid	Gene Ontology	GO:0009534
	chloroplast thylakoid membrane	Gene Ontology	GO:0009535
	plastid	Gene Ontology	GO:0009536
	chloroplast stroma	Gene Ontology	GO:0009570
	thylakoid	Gene Ontology	GO:0009579
	photosynthetic electron transport chain	Gene Ontology	GO:0009767
	chloroplast envelope	Gene Ontology	GO:0009941
	thylakoid lumen	Gene Ontology	GO:0031977
	defense response to bacterium	Gene Ontology	GO:0042742
	electron transporter, transferring electrons within the cyclic electron transport pathway of photosynthesis activity	Gene Ontology	GO:0045156
	electron transporter, transferring electrons within the noncyclic electron transport pathway of photosynthesis activity	Gene Ontology	GO:0045157
	apoplast	Gene Ontology	GO:0048046
	oxidation-reduction process	Gene Ontology	GO:0055114
	chloroplast thylakoid membrane protein complex	Gene Ontology	GO:0098807
GOslim:	intracellular	Gene Ontology Slim	GO:0005622
	cytoplasm	Gene Ontology Slim	GO:0005737
	plastid	Gene Ontology Slim	GO:0009536
	thylakoid	Gene Ontology Slim	GO:0009579
	organelle	Gene Ontology Slim	GO:0043226
////
Query:	Gene.137490::c157048.graph_c0::g.137490::m.137490
Gene:	ath:AT3G50820	PSBO2
Entrez Gene ID:	824246
Pathway:	Photosynthesis	KEGG PATHWAY	ath00195
GO:	mRNA binding	Gene Ontology	GO:0003729
	protein binding	Gene Ontology	GO:0005515
	cytosol	Gene Ontology	GO:0005829
	poly(U) RNA binding	Gene Ontology	GO:0008266
	chloroplast	Gene Ontology	GO:0009507
	chloroplast thylakoid	Gene Ontology	GO:0009534
	chloroplast thylakoid membrane	Gene Ontology	GO:0009535
	chloroplast thylakoid lumen	Gene Ontology	GO:0009543
	chloroplast stroma	Gene Ontology	GO:0009570
	thylakoid	Gene Ontology	GO:0009579
	photosystem II oxygen evolving complex	Gene Ontology	GO:0009654
	photoinhibition	Gene Ontology	GO:0010205
	photosystem II assembly	Gene Ontology	GO:0010207
	oxygen evolving activity	Gene Ontology	GO:0010242
	plastoglobule	Gene Ontology	GO:0010287
	photosynthesis, light reaction	Gene Ontology	GO:0019684
	thylakoid lumen	Gene Ontology	GO:0031977
	regulation of protein dephosphorylation	Gene Ontology	GO:0035304
	photosystem II stabilization	Gene Ontology	GO:0042549
GOslim:	intracellular	Gene Ontology Slim	GO:0005622
	cytoplasm	Gene Ontology Slim	GO:0005737
	cytosol	Gene Ontology Slim	GO:0005829
	thylakoid	Gene Ontology Slim	GO:0009579
////
Query:	Gene.137797::c157132.graph_c0::g.137797::m.137797
Gene:	ath:AT4G32260	PDE334
Entrez Gene ID:	829359
Pathway:	Metabolic pathways	KEGG PATHWAY	ath01100
	Photosynthesis	KEGG PATHWAY	ath00195
	Oxidative phosphorylation	KEGG PATHWAY	ath00190
GO:	mRNA binding	Gene Ontology	GO:0003729
	plasma membrane	Gene Ontology	GO:0005886
	chloroplast	Gene Ontology	GO:0009507
	chloroplast thylakoid	Gene Ontology	GO:0009534
	chloroplast thylakoid membrane	Gene Ontology	GO:0009535
	thylakoid	Gene Ontology	GO:0009579
	chloroplast envelope	Gene Ontology	GO:0009941
	ATP synthesis coupled proton transport	Gene Ontology	GO:0015986
	defense response to bacterium	Gene Ontology	GO:0042742
	proton-transporting ATP synthase complex, coupling factor F(o)	Gene Ontology	GO:0045263
GOslim:	intracellular	Gene Ontology Slim	GO:0005622
	plasma membrane	Gene Ontology Slim	GO:0005886
	thylakoid	Gene Ontology Slim	GO:0009579
////
Query:	Gene.152147::c26159.graph_c0::g.152147::m.152147
Gene:	ath:AT1G44575	NPQ4
Entrez Gene ID:	841033
Pathway:	Photosynthesis	KEGG PATHWAY	ath00195
GO:	mRNA binding	Gene Ontology	GO:0003729
	nucleus	Gene Ontology	GO:0005634
	chloroplast	Gene Ontology	GO:0009507
	PSII associated light-harvesting complex II	Gene Ontology	GO:0009517
	chloroplast thylakoid	Gene Ontology	GO:0009534
	chloroplast thylakoid membrane	Gene Ontology	GO:0009535
	thylakoid	Gene Ontology	GO:0009579
	thylakoid membrane organization	Gene Ontology	GO:0010027
	nonphotochemical quenching	Gene Ontology	GO:0010196
	chlorophyll binding	Gene Ontology	GO:0016168
	xanthophyll binding	Gene Ontology	GO:0051738
	response to karrikin	Gene Ontology	GO:0080167
GOslim:	intracellular	Gene Ontology Slim	GO:0005622
	nucleus	Gene Ontology Slim	GO:0005634
	thylakoid	Gene Ontology Slim	GO:0009579
	photosynthesis	Gene Ontology Slim	GO:0015979
	organelle	Gene Ontology Slim	GO:0043226
////
Query:	Gene.156263::c37699.graph_c0::g.156263::m.156263
Gene:	ath:AT1G79040	PSBR
Entrez Gene ID:	844245
Pathway:	Photosynthesis	KEGG PATHWAY	ath00195
GO:	mRNA binding	Gene Ontology	GO:0003729
	protein binding	Gene Ontology	GO:0005515
	mitochondrion	Gene Ontology	GO:0005739
	chloroplast	Gene Ontology	GO:0009507
	chloroplast thylakoid	Gene Ontology	GO:0009534
	chloroplast thylakoid membrane	Gene Ontology	GO:0009535
	thylakoid	Gene Ontology	GO:0009579
	photosystem II oxygen evolving complex	Gene Ontology	GO:0009654
	photosystem II oxygen evolving complex assembly	Gene Ontology	GO:0010270
GOslim:	intracellular	Gene Ontology Slim	GO:0005622
	cytoplasm	Gene Ontology Slim	GO:0005737
	mitochondrion	Gene Ontology Slim	GO:0005739
	thylakoid	Gene Ontology Slim	GO:0009579
	organelle	Gene Ontology Slim	GO:0043226
////
Query:	Gene.157777::c47950.graph_c0::g.157777::m.157777
Gene:	ath:AT1G67740	PSBY
Entrez Gene ID:	843099
Pathway:	Photosynthesis	KEGG PATHWAY	ath00195
GO:	chloroplast	Gene Ontology	GO:0009507
	photosystem II	Gene Ontology	GO:0009523
	chloroplast stromal thylakoid	Gene Ontology	GO:0009533
	chloroplast thylakoid	Gene Ontology	GO:0009534
	chloroplast thylakoid membrane	Gene Ontology	GO:0009535
	photoinhibition	Gene Ontology	GO:0010205
	photosynthesis	Gene Ontology	GO:0015979
	manganese ion binding	Gene Ontology	GO:0030145
	cell redox homeostasis	Gene Ontology	GO:0045454
GOslim:	photosynthesis	Gene Ontology Slim	GO:0015979
////
Query:	Gene.159499::c55896.graph_c0::g.159499::m.159499
Gene:	ath:AT1G60950	FED_A
Entrez Gene ID:	842386
Pathway:	Photosynthesis	KEGG PATHWAY	ath00195
GO:	electron transfer activity	Gene Ontology	GO:0009055
	response to light stimulus	Gene Ontology	GO:0009416
	chloroplast	Gene Ontology	GO:0009507
	chloroplast stroma	Gene Ontology	GO:0009570
	photosynthetic acclimation	Gene Ontology	GO:0009643
	photosynthetic electron transport chain	Gene Ontology	GO:0009767
////
Query:	Gene.163760::c68327.graph_c0::g.163760::m.163760
Gene:	ath:AT5G64040	PSAN
Entrez Gene ID:	836525
Pathway:	Photosynthesis	KEGG PATHWAY	ath00195
GO:	calmodulin binding	Gene Ontology	GO:0005516
	chloroplast	Gene Ontology	GO:0009507
	photosystem I	Gene Ontology	GO:0009522
	chloroplast thylakoid	Gene Ontology	GO:0009534
	chloroplast thylakoid membrane	Gene Ontology	GO:0009535
	plastid	Gene Ontology	GO:0009536
	chloroplast thylakoid lumen	Gene Ontology	GO:0009543
	thylakoid	Gene Ontology	GO:0009579
	photosynthetic electron transport in photosystem I	Gene Ontology	GO:0009773
	photosynthesis	Gene Ontology	GO:0015979
	chloroplast photosystem I	Gene Ontology	GO:0030093
////
Query:	Gene.113716::c153759.graph_c0::g.113716::m.113716
Gene:	ath:AT2G27510	FD3
Entrez Gene ID:	817297
Pathway:	Photosynthesis	KEGG PATHWAY	ath00195
GO:	electron transfer activity	Gene Ontology	GO:0009055
	chloroplast	Gene Ontology	GO:0009507
	plastid	Gene Ontology	GO:0009536
	electron transport chain	Gene Ontology	GO:0022900
GOslim:	intracellular	Gene Ontology Slim	GO:0005622
	cytoplasm	Gene Ontology Slim	GO:0005737
	plastid	Gene Ontology Slim	GO:0009536
	organelle	Gene Ontology Slim	GO:0043226
////
Query:	Gene.2702::c105617.graph_c0::g.2702::m.2702
////
Query:	Gene.26368::c129109.graph_c0::g.26368::m.26368
Gene:	ath:AT1G79040	PSBR
Entrez Gene ID:	844245
Pathway:	Photosynthesis	KEGG PATHWAY	ath00195
GO:	mRNA binding	Gene Ontology	GO:0003729
	protein binding	Gene Ontology	GO:0005515
	mitochondrion	Gene Ontology	GO:0005739
	chloroplast	Gene Ontology	GO:0009507
	chloroplast thylakoid	Gene Ontology	GO:0009534
	chloroplast thylakoid membrane	Gene Ontology	GO:0009535
	thylakoid	Gene Ontology	GO:0009579
	photosystem II oxygen evolving complex	Gene Ontology	GO:0009654
	photosystem II oxygen evolving complex assembly	Gene Ontology	GO:0010270
GOslim:	intracellular	Gene Ontology Slim	GO:0005622
	cytoplasm	Gene Ontology Slim	GO:0005737
	mitochondrion	Gene Ontology Slim	GO:0005739
	thylakoid	Gene Ontology Slim	GO:0009579
	organelle	Gene Ontology Slim	GO:0043226
////
Query:	Gene.63253::c143865.graph_c0::g.63253::m.63253
Gene:	ath:AT1G20020	FNR2
Entrez Gene ID:	838591
Pathway:	Metabolic pathways	KEGG PATHWAY	ath01100
	Photosynthesis	KEGG PATHWAY	ath00195
	oxygenic photosynthesis	BioCyc	PHOTOALL-PWY
	photosynthesis light reactions	BioCyc	PWY-101
GO:	NADPH dehydrogenase activity	Gene Ontology	GO:0003959
	ferredoxin-NADP+ reductase activity	Gene Ontology	GO:0004324
	nucleus	Gene Ontology	GO:0005634
	cytosol	Gene Ontology	GO:0005829
	poly(U) RNA binding	Gene Ontology	GO:0008266
	chloroplast	Gene Ontology	GO:0009507
	chloroplast thylakoid	Gene Ontology	GO:0009534
	chloroplast thylakoid membrane	Gene Ontology	GO:0009535
	chloroplast stroma	Gene Ontology	GO:0009570
	thylakoid	Gene Ontology	GO:0009579
	defense response to fungus, incompatible interaction	Gene Ontology	GO:0009817
	photosynthesis	Gene Ontology	GO:0015979
	defense response to bacterium	Gene Ontology	GO:0042742
	apoplast	Gene Ontology	GO:0048046
	oxidation-reduction process	Gene Ontology	GO:0055114
	chloroplast thylakoid membrane protein complex	Gene Ontology	GO:0098807
GOslim:	intracellular	Gene Ontology Slim	GO:0005622
	nucleus	Gene Ontology Slim	GO:0005634
	thylakoid	Gene Ontology Slim	GO:0009579
	photosynthesis	Gene Ontology Slim	GO:0015979
	organelle	Gene Ontology Slim	GO:0043226
////
Query:	Gene.74368::c146541.graph_c0::g.74368::m.74368
Gene:	ath:AT1G15700	ATPC2
Entrez Gene ID:	838139
Pathway:	Metabolic pathways	KEGG PATHWAY	ath01100
	Photosynthesis	KEGG PATHWAY	ath00195
	Oxidative phosphorylation	KEGG PATHWAY	ath00190
	superpathway of purine nucleotides de novo biosynthesis I	BioCyc	PWY-841
	adenosine ribonucleotides de novo biosynthesis	BioCyc	PWY-7219
	superpathway of adenosine nucleotides de novo biosynthesis I	BioCyc	PWY-7229
GO:	mitochondrial proton-transporting ATP synthase complex, catalytic sector F(1)	Gene Ontology	GO:0000275
	ATP biosynthetic process	Gene Ontology	GO:0006754
	chloroplast	Gene Ontology	GO:0009507
	chloroplast thylakoid membrane	Gene Ontology	GO:0009535
	chloroplast ATP synthase complex	Gene Ontology	GO:0009544
	ATP synthesis coupled proton transport	Gene Ontology	GO:0015986
	enzyme regulator activity	Gene Ontology	GO:0030234
	regulation of root morphogenesis	Gene Ontology	GO:2000067
GOslim:	enzyme regulator activity	Gene Ontology Slim	GO:0030234
////
Query:	Gene.83874::c148557.graph_c2::g.83874::m.83874
Gene:	ath:ArthCp035	petA
Entrez Gene ID:	844748
Pathway:	Metabolic pathways	KEGG PATHWAY	ath01100
	Photosynthesis	KEGG PATHWAY	ath00195
////
Query:	Gene.113878::c153788.graph_c0::g.113878::m.113878
Gene:	ath:AT4G14890	FdC1
Entrez Gene ID:	827146
Pathway:	glutamate biosynthesis V	BioCyc	PWY-4341
	Photosynthesis	KEGG PATHWAY	ath00195
	oleate biosynthesis I (plants)	BioCyc	PWY-5147
	methylerythritol phosphate pathway II	BioCyc	PWY-7560
	glycine betaine biosynthesis III (plants)	BioCyc	PWY1F-353
	oxygenic photosynthesis	BioCyc	PHOTOALL-PWY
	phytochromobilin biosynthesis	BioCyc	PWY-7170
	superpathway of ammonia assimilation (plants)	BioCyc	PWY-3282
	sulfate reduction II (assimilatory)	BioCyc	SULFMETII-PWY
	glutamine biosynthesis III	BioCyc	PWY-6549
	photosynthesis light reactions	BioCyc	PWY-101
	nitrate reduction II (assimilatory)	BioCyc	PWY-381
	superpathway of fatty acid biosynthesis II (plant)	BioCyc	PWY-5156
	chlorophyll cycle	BioCyc	PWY-5068
	ammonia assimilation cycle II	BioCyc	PWY-6964
	glutamate-glutamine shuttle	BioCyc	PWY-7061
GO:	electron transfer activity	Gene Ontology	GO:0009055
	chloroplast	Gene Ontology	GO:0009507
	response to high light intensity	Gene Ontology	GO:0009644
	electron transport chain	Gene Ontology	GO:0022900
	2 iron, 2 sulfur cluster binding	Gene Ontology	GO:0051537
////
Query:	Gene.175008::c96883.graph_c0::g.175008::m.175008
Gene:	ath:AT2G20260	PSAE-2
Entrez Gene ID:	816545
Pathway:	Metabolic pathways	KEGG PATHWAY	ath01100
	Photosynthesis	KEGG PATHWAY	ath00195
GO:	mitochondrion	Gene Ontology	GO:0005739
	chloroplast	Gene Ontology	GO:0009507
	chloroplast thylakoid	Gene Ontology	GO:0009534
	chloroplast thylakoid membrane	Gene Ontology	GO:0009535
	photosystem I reaction center	Gene Ontology	GO:0009538
	thylakoid	Gene Ontology	GO:0009579
	chloroplast envelope	Gene Ontology	GO:0009941
	plastoglobule	Gene Ontology	GO:0010287
GOslim:	intracellular	Gene Ontology Slim	GO:0005622
	cytoplasm	Gene Ontology Slim	GO:0005737
	mitochondrion	Gene Ontology Slim	GO:0005739
	thylakoid	Gene Ontology Slim	GO:0009579
	photosynthesis	Gene Ontology Slim	GO:0015979
	organelle	Gene Ontology Slim	GO:0043226
////
Query:	Gene.56397::c141956.graph_c0::g.56397::m.56397
Gene:	ath:AT1G44575	NPQ4
Entrez Gene ID:	841033
Pathway:	Photosynthesis	KEGG PATHWAY	ath00195
GO:	mRNA binding	Gene Ontology	GO:0003729
	nucleus	Gene Ontology	GO:0005634
	chloroplast	Gene Ontology	GO:0009507
	PSII associated light-harvesting complex II	Gene Ontology	GO:0009517
	chloroplast thylakoid	Gene Ontology	GO:0009534
	chloroplast thylakoid membrane	Gene Ontology	GO:0009535
	thylakoid	Gene Ontology	GO:0009579
	thylakoid membrane organization	Gene Ontology	GO:0010027
	nonphotochemical quenching	Gene Ontology	GO:0010196
	chlorophyll binding	Gene Ontology	GO:0016168
	xanthophyll binding	Gene Ontology	GO:0051738
	response to karrikin	Gene Ontology	GO:0080167
GOslim:	intracellular	Gene Ontology Slim	GO:0005622
	nucleus	Gene Ontology Slim	GO:0005634
	thylakoid	Gene Ontology Slim	GO:0009579
	photosynthesis	Gene Ontology Slim	GO:0015979
	organelle	Gene Ontology Slim	GO:0043226

## Sheet: proteome
ath00196 Photosynthesis - antenna proteins	0.142478	c4992_f8p69_1103	"photosystem I chlorophyll a/b-binding protein 3-1, chloroplastic"
ath00196 Photosynthesis - antenna proteins	0.142478	c5022_f8p9_1015	"chlorophyll a-b binding protein 13, chloroplastic"
ath00196 Photosynthesis - antenna proteins	0.0760937	c43587_f10p5_1082	"chlorophyll a-b binding protein CP29.1, chloroplastic"
ath00196 Photosynthesis - antenna proteins	0.0760937	c5022_f8p9_1015	"chlorophyll a-b binding protein 13, chloroplastic"
