# Supplementary material for: Multi-Approach Analysis Reveals Pathways of Cold Tolerance Divergence in Camellia japonica
Source: Front Plant Sci. 2022 Feb 25;13:811791. doi: 10.3389/fpls.2022.811791 (PMC8914472; doi:10.3389/fpls.2022.811791)
Supplement: Supplementary Table 10 — The annotation of Carbon fixation. [file Table_10.XLSX]

## Sheet: transcriptome
#Query	Gene ID|Gene name|Hyperlink
Gene.12174::c117808.graph_c0::g.12174::m.12174	ath:AT1G42970|GAPB|http://www.genome.jp/dbget-bin/www_bget?ath:AT1G42970
Gene.17377::c122766.graph_c0::g.17377::m.17377	ath:AT1G67090|RBCS1A|http://www.genome.jp/dbget-bin/www_bget?ath:AT1G67090
Gene.137623::c157084.graph_c0::g.137623::m.137623	ath:AT5G09660|PMDH2|http://www.genome.jp/dbget-bin/www_bget?ath:AT5G09660
Gene.157279::c44642.graph_c0::g.157279::m.157279	ath:AT1G67090|RBCS1A|http://www.genome.jp/dbget-bin/www_bget?ath:AT1G67090
Gene.168760::c87476.graph_c0::g.168760::m.168760	ath:AT4G26530|FBA5|http://www.genome.jp/dbget-bin/www_bget?ath:AT4G26530
Gene.31305::c132017.graph_c0::g.31305::m.31305	None
Gene.84231::c148622.graph_c1::g.84231::m.84231	ath:AT3G60750||http://www.genome.jp/dbget-bin/www_bget?ath:AT3G60750
Gene.164281::c73015.graph_c0::g.164281::m.164281	ath:AT2G30970|ASP1|http://www.genome.jp/dbget-bin/www_bget?ath:AT2G30970
Gene.65003::c144299.graph_c0::g.65003::m.65003	ath:AT2G30970|ASP1|http://www.genome.jp/dbget-bin/www_bget?ath:AT2G30970
Gene.93253::c150324.graph_c1::g.93253::m.93253	ath:ArthCp030|rbcL|http://www.genome.jp/dbget-bin/www_bget?ath:ArthCp030
Gene.2067::c104799.graph_c0::g.2067::m.2067	ath:AT1G72330|ALAAT2|http://www.genome.jp/dbget-bin/www_bget?ath:AT1G72330
Gene.17742::c123009.graph_c0::g.17742::m.17742	ath:AT1G53240|mMDH1|http://www.genome.jp/dbget-bin/www_bget?ath:AT1G53240
Gene.49423::c139805.graph_c0::g.49423::m.49423	ath:AT1G18270||http://www.genome.jp/dbget-bin/www_bget?ath:AT1G18270
Gene.84226::c148622.graph_c0::g.84226::m.84226	ath:AT2G45290||http://www.genome.jp/dbget-bin/www_bget?ath:AT2G45290
Gene.88617::c149461.graph_c0::g.88617::m.88617	ath:AT1G79530|GAPCP-1|http://www.genome.jp/dbget-bin/www_bget?ath:AT1G79530
GO Terms
Query:	Gene.12174::c117808.graph_c0::g.12174::m.12174
Gene:	ath:AT1G42970	GAPB
Entrez Gene ID:	840895
Pathway:	Metabolic pathways	KEGG PATHWAY	ath01100
	Carbon metabolism	KEGG PATHWAY	ath01200
	Huntington disease	PANTHER	P00029
	Carbon fixation in photosynthetic organisms	KEGG PATHWAY	ath00710
GO:	mRNA binding	Gene Ontology	GO:0003729
	glyceraldehyde-3-phosphate dehydrogenase (NAD+) (phosphorylating) activity	Gene Ontology	GO:0004365
	nucleus	Gene Ontology	GO:0005634
	cytosol	Gene Ontology	GO:0005829
	glucose metabolic process	Gene Ontology	GO:0006006
	response to cold	Gene Ontology	GO:0009409
	response to light stimulus	Gene Ontology	GO:0009416
	chloroplast	Gene Ontology	GO:0009507
	chloroplast thylakoid membrane	Gene Ontology	GO:0009535
	chloroplast stroma	Gene Ontology	GO:0009570
	response to sucrose	Gene Ontology	GO:0009744
	chloroplast envelope	Gene Ontology	GO:0009941
	stromule	Gene Ontology	GO:0010319
	reductive pentose-phosphate cycle	Gene Ontology	GO:0019253
	response to cadmium ion	Gene Ontology	GO:0046686
	glyceraldehyde-3-phosphate dehydrogenase (NADP+) (phosphorylating) activity	Gene Ontology	GO:0047100
	apoplast	Gene Ontology	GO:0048046
	NADP binding	Gene Ontology	GO:0050661
	NAD binding	Gene Ontology	GO:0051287
GOslim:	intracellular	Gene Ontology Slim	GO:0005622
	nucleus	Gene Ontology Slim	GO:0005634
	organelle	Gene Ontology Slim	GO:0043226
////
Query:	Gene.17377::c122766.graph_c0::g.17377::m.17377
Gene:	ath:AT1G67090	RBCS1A
Entrez Gene ID:	843029
Pathway:	Metabolic pathways	KEGG PATHWAY	ath01100
	Biosynthesis of secondary metabolites	KEGG PATHWAY	ath01110
	Carbon metabolism	KEGG PATHWAY	ath01200
	Glyoxylate and dicarboxylate metabolism	KEGG PATHWAY	ath00630
	Carbon fixation in photosynthetic organisms	KEGG PATHWAY	ath00710
GO:	mRNA binding	Gene Ontology	GO:0003729
	copper ion binding	Gene Ontology	GO:0005507
	mitochondrion	Gene Ontology	GO:0005739
	response to cold	Gene Ontology	GO:0009409
	chloroplast	Gene Ontology	GO:0009507
	chloroplast thylakoid membrane	Gene Ontology	GO:0009535
	chloroplast stroma	Gene Ontology	GO:0009570
	thylakoid	Gene Ontology	GO:0009579
	chloroplast envelope	Gene Ontology	GO:0009941
	photosynthesis	Gene Ontology	GO:0015979
	ribulose-bisphosphate carboxylase activity	Gene Ontology	GO:0016984
	cytosolic ribosome	Gene Ontology	GO:0022626
	thylakoid lumen	Gene Ontology	GO:0031977
	apoplast	Gene Ontology	GO:0048046
	ribulose bisphosphate carboxylase complex assembly	Gene Ontology	GO:0110102
GOslim:	intracellular	Gene Ontology Slim	GO:0005622
	cytoplasm	Gene Ontology Slim	GO:0005737
	mitochondrion	Gene Ontology Slim	GO:0005739
	thylakoid	Gene Ontology Slim	GO:0009579
	photosynthesis	Gene Ontology Slim	GO:0015979
	organelle	Gene Ontology Slim	GO:0043226
////
Query:	Gene.137623::c157084.graph_c0::g.137623::m.137623
Gene:	ath:AT5G09660	PMDH2
Entrez Gene ID:	830825
Pathway:	Metabolic pathways	KEGG PATHWAY	ath01100
	Biosynthesis of secondary metabolites	KEGG PATHWAY	ath01110
	glyoxylate cycle	BioCyc	GLYOXYLATE-BYPASS
	Cysteine and methionine metabolism	KEGG PATHWAY	ath00270
	Carbon metabolism	KEGG PATHWAY	ath01200
	Pyruvate metabolism	KEGG PATHWAY	ath00620
	Glyoxylate and dicarboxylate metabolism	KEGG PATHWAY	ath00630
	Carbon fixation in photosynthetic organisms	KEGG PATHWAY	ath00710
	Citrate cycle (TCA cycle)	KEGG PATHWAY	ath00020
	gluconeogenesis III	BioCyc	PWY66-399
	TCA cycle II (plants and fungi)	BioCyc	PWY-5690
	gluconeogenesis I	BioCyc	GLUCONEO-PWY
	malate-oxaloacetate shuttle I	BioCyc	PWY-7047
	aspartate degradation II	BioCyc	MALATE-ASPARTATE-SHUTTLE-PWY
	superpathway of cytosolic glycolysis (plants), pyruvate dehydrogenase and TCA cycle	BioCyc	PWY-5464
GO:	cytoplasm	Gene Ontology	GO:0005737
	vacuole	Gene Ontology	GO:0005773
	peroxisome	Gene Ontology	GO:0005777
	plasma membrane	Gene Ontology	GO:0005886
	carbohydrate metabolic process	Gene Ontology	GO:0005975
	tricarboxylic acid cycle	Gene Ontology	GO:0006099
	malate metabolic process	Gene Ontology	GO:0006108
	chloroplast	Gene Ontology	GO:0009507
	chloroplast envelope	Gene Ontology	GO:0009941
	malate dehydrogenase activity	Gene Ontology	GO:0016615
	carboxylic acid metabolic process	Gene Ontology	GO:0019752
	L-malate dehydrogenase activity	Gene Ontology	GO:0030060
	regulation of fatty acid beta-oxidation	Gene Ontology	GO:0031998
	microbody	Gene Ontology	GO:0042579
	apoplast	Gene Ontology	GO:0048046
	regulation of photorespiration	Gene Ontology	GO:0080093
////
Query:	Gene.157279::c44642.graph_c0::g.157279::m.157279
Gene:	ath:AT1G67090	RBCS1A
Entrez Gene ID:	843029
Pathway:	Metabolic pathways	KEGG PATHWAY	ath01100
	Biosynthesis of secondary metabolites	KEGG PATHWAY	ath01110
	Carbon metabolism	KEGG PATHWAY	ath01200
	Glyoxylate and dicarboxylate metabolism	KEGG PATHWAY	ath00630
	Carbon fixation in photosynthetic organisms	KEGG PATHWAY	ath00710
GO:	mRNA binding	Gene Ontology	GO:0003729
	copper ion binding	Gene Ontology	GO:0005507
	mitochondrion	Gene Ontology	GO:0005739
	response to cold	Gene Ontology	GO:0009409
	chloroplast	Gene Ontology	GO:0009507
	chloroplast thylakoid membrane	Gene Ontology	GO:0009535
	chloroplast stroma	Gene Ontology	GO:0009570
	thylakoid	Gene Ontology	GO:0009579
	chloroplast envelope	Gene Ontology	GO:0009941
	photosynthesis	Gene Ontology	GO:0015979
	ribulose-bisphosphate carboxylase activity	Gene Ontology	GO:0016984
	cytosolic ribosome	Gene Ontology	GO:0022626
	thylakoid lumen	Gene Ontology	GO:0031977
	apoplast	Gene Ontology	GO:0048046
	ribulose bisphosphate carboxylase complex assembly	Gene Ontology	GO:0110102
GOslim:	intracellular	Gene Ontology Slim	GO:0005622
	cytoplasm	Gene Ontology Slim	GO:0005737
	mitochondrion	Gene Ontology Slim	GO:0005739
	thylakoid	Gene Ontology Slim	GO:0009579
	photosynthesis	Gene Ontology Slim	GO:0015979
	organelle	Gene Ontology Slim	GO:0043226
////
Query:	Gene.168760::c87476.graph_c0::g.168760::m.168760
Gene:	ath:AT4G26530	FBA5
Entrez Gene ID:	828759
Pathway:	Metabolic pathways	KEGG PATHWAY	ath01100
	Biosynthesis of secondary metabolites	KEGG PATHWAY	ath01110
	Biosynthesis of amino acids	KEGG PATHWAY	ath01230
	Carbon metabolism	KEGG PATHWAY	ath01200
	Glycolysis / Gluconeogenesis	KEGG PATHWAY	ath00010
	Pentose phosphate pathway	KEGG PATHWAY	ath00030
	Fructose and mannose metabolism	KEGG PATHWAY	ath00051
	Carbon fixation in photosynthetic organisms	KEGG PATHWAY	ath00710
	oxygenic photosynthesis	BioCyc	PHOTOALL-PWY
	gluconeogenesis III	BioCyc	PWY66-399
	gluconeogenesis I	BioCyc	GLUCONEO-PWY
	glycolysis IV (plant cytosol)	BioCyc	PWY-1042
	sucrose biosynthesis I (from photosynthesis)	BioCyc	SUCSYN-PWY
	glycolysis II (from fructose 6-phosphate)	BioCyc	PWY-5484
	Calvin-Benson-Bassham cycle	BioCyc	CALVIN-PWY
	glycolysis I (from glucose 6-phosphate)	BioCyc	GLYCOLYSIS
	superpathway of cytosolic glycolysis (plants), pyruvate dehydrogenase and TCA cycle	BioCyc	PWY-5464
GO:	mRNA binding	Gene Ontology	GO:0003729
	fructose-bisphosphate aldolase activity	Gene Ontology	GO:0004332
	protein binding	Gene Ontology	GO:0005515
	cytoplasm	Gene Ontology	GO:0005737
	cytosol	Gene Ontology	GO:0005829
	gluconeogenesis	Gene Ontology	GO:0006094
	glycolytic process	Gene Ontology	GO:0006096
	fructose 1,6-bisphosphate metabolic process	Gene Ontology	GO:0030388
GOslim:	intracellular	Gene Ontology Slim	GO:0005622
	cytoplasm	Gene Ontology Slim	GO:0005737
	cytosol	Gene Ontology Slim	GO:0005829
////
Query:	Gene.31305::c132017.graph_c0::g.31305::m.31305
////
Query:	Gene.84231::c148622.graph_c1::g.84231::m.84231
Gene:	ath:AT3G60750
Entrez Gene ID:	825246
Pathway:	Metabolic pathways	KEGG PATHWAY	ath01100
	Biosynthesis of secondary metabolites	KEGG PATHWAY	ath01110
	Biosynthesis of amino acids	KEGG PATHWAY	ath01230
	pentose phosphate pathway	BioCyc	PENTOSE-P-PWY
	Carbon metabolism	KEGG PATHWAY	ath01200
	Pentose phosphate pathway	KEGG PATHWAY	ath00030
	Carbon fixation in photosynthetic organisms	KEGG PATHWAY	ath00710
	oxygenic photosynthesis	BioCyc	PHOTOALL-PWY
	pentose phosphate pathway (non-oxidative branch)	BioCyc	NONOXIPENT-PWY
	Rubisco shunt	BioCyc	PWY-5723
	Calvin-Benson-Bassham cycle	BioCyc	CALVIN-PWY
GO:	mRNA binding	Gene Ontology	GO:0003729
	transketolase activity	Gene Ontology	GO:0004802
	cytosol	Gene Ontology	GO:0005829
	pentose-phosphate shunt	Gene Ontology	GO:0006098
	chloroplast	Gene Ontology	GO:0009507
	plastid	Gene Ontology	GO:0009536
	chloroplast stroma	Gene Ontology	GO:0009570
	chloroplast envelope	Gene Ontology	GO:0009941
	reductive pentose-phosphate cycle	Gene Ontology	GO:0019253
	response to cadmium ion	Gene Ontology	GO:0046686
GOslim:	intracellular	Gene Ontology Slim	GO:0005622
	cytoplasm	Gene Ontology Slim	GO:0005737
	cytosol	Gene Ontology Slim	GO:0005829
	plastid	Gene Ontology Slim	GO:0009536
	organelle	Gene Ontology Slim	GO:0043226
////
Query:	Gene.164281::c73015.graph_c0::g.164281::m.164281
Gene:	ath:AT2G30970	ASP1
Entrez Gene ID:	817648
Pathway:	Metabolic pathways	KEGG PATHWAY	ath01100
	Biosynthesis of secondary metabolites	KEGG PATHWAY	ath01110
	Tyrosine metabolism	KEGG PATHWAY	ath00350
	Phenylalanine metabolism	KEGG PATHWAY	ath00360
	Isoquinoline alkaloid biosynthesis	KEGG PATHWAY	ath00950
	Tropane, piperidine and pyridine alkaloid biosynthesis	KEGG PATHWAY	ath00960
	Biosynthesis of amino acids	KEGG PATHWAY	ath01230
	Cysteine and methionine metabolism	KEGG PATHWAY	ath00270
	Phenylalanine, tyrosine and tryptophan biosynthesis	KEGG PATHWAY	ath00400
	Carbon metabolism	KEGG PATHWAY	ath01200
	Arginine and proline metabolism	KEGG PATHWAY	ath00330
	Carbon fixation in photosynthetic organisms	KEGG PATHWAY	ath00710
	2-Oxocarboxylic acid metabolism	KEGG PATHWAY	ath01210
	Alanine, aspartate and glutamate metabolism	KEGG PATHWAY	ath00250
	Arginine biosynthesis	KEGG PATHWAY	ath00220
GO:	L-aspartate:2-oxoglutarate aminotransferase activity	Gene Ontology	GO:0004069
	copper ion binding	Gene Ontology	GO:0005507
	nucleus	Gene Ontology	GO:0005634
	mitochondrion	Gene Ontology	GO:0005739
	peroxisome	Gene Ontology	GO:0005777
	cytosol	Gene Ontology	GO:0005829
	2-oxoglutarate metabolic process	Gene Ontology	GO:0006103
	proteolysis	Gene Ontology	GO:0006508
	aspartate metabolic process	Gene Ontology	GO:0006531
	glutamate metabolic process	Gene Ontology	GO:0006536
	biosynthetic process	Gene Ontology	GO:0009058
	protein sumoylation	Gene Ontology	GO:0016925
	protein desumoylation	Gene Ontology	GO:0016926
	pyridoxal phosphate binding	Gene Ontology	GO:0030170
	response to cadmium ion	Gene Ontology	GO:0046686
	positive regulation of short-day photoperiodism, flowering	Gene Ontology	GO:0048576
	positive regulation of long-day photoperiodism, flowering	Gene Ontology	GO:0048578
	SUMO-specific endopeptidase activity	Gene Ontology	GO:0070139
GOslim:	intracellular	Gene Ontology Slim	GO:0005622
	cytoplasm	Gene Ontology Slim	GO:0005737
	mitochondrion	Gene Ontology Slim	GO:0005739
	peroxisome	Gene Ontology Slim	GO:0005777
	cytosol	Gene Ontology Slim	GO:0005829
	biosynthetic process	Gene Ontology Slim	GO:0009058
	organelle	Gene Ontology Slim	GO:0043226
////
Query:	Gene.65003::c144299.graph_c0::g.65003::m.65003
Gene:	ath:AT2G30970	ASP1
Entrez Gene ID:	817648
Pathway:	Metabolic pathways	KEGG PATHWAY	ath01100
	Biosynthesis of secondary metabolites	KEGG PATHWAY	ath01110
	Tyrosine metabolism	KEGG PATHWAY	ath00350
	Phenylalanine metabolism	KEGG PATHWAY	ath00360
	Isoquinoline alkaloid biosynthesis	KEGG PATHWAY	ath00950
	Tropane, piperidine and pyridine alkaloid biosynthesis	KEGG PATHWAY	ath00960
	Biosynthesis of amino acids	KEGG PATHWAY	ath01230
	Cysteine and methionine metabolism	KEGG PATHWAY	ath00270
	Phenylalanine, tyrosine and tryptophan biosynthesis	KEGG PATHWAY	ath00400
	Carbon metabolism	KEGG PATHWAY	ath01200
	Arginine and proline metabolism	KEGG PATHWAY	ath00330
	Carbon fixation in photosynthetic organisms	KEGG PATHWAY	ath00710
	2-Oxocarboxylic acid metabolism	KEGG PATHWAY	ath01210
	Alanine, aspartate and glutamate metabolism	KEGG PATHWAY	ath00250
	Arginine biosynthesis	KEGG PATHWAY	ath00220
GO:	L-aspartate:2-oxoglutarate aminotransferase activity	Gene Ontology	GO:0004069
	copper ion binding	Gene Ontology	GO:0005507
	nucleus	Gene Ontology	GO:0005634
	mitochondrion	Gene Ontology	GO:0005739
	peroxisome	Gene Ontology	GO:0005777
	cytosol	Gene Ontology	GO:0005829
	2-oxoglutarate metabolic process	Gene Ontology	GO:0006103
	proteolysis	Gene Ontology	GO:0006508
	aspartate metabolic process	Gene Ontology	GO:0006531
	glutamate metabolic process	Gene Ontology	GO:0006536
	biosynthetic process	Gene Ontology	GO:0009058
	protein sumoylation	Gene Ontology	GO:0016925
	protein desumoylation	Gene Ontology	GO:0016926
	pyridoxal phosphate binding	Gene Ontology	GO:0030170
	response to cadmium ion	Gene Ontology	GO:0046686
	positive regulation of short-day photoperiodism, flowering	Gene Ontology	GO:0048576
	positive regulation of long-day photoperiodism, flowering	Gene Ontology	GO:0048578
	SUMO-specific endopeptidase activity	Gene Ontology	GO:0070139
GOslim:	intracellular	Gene Ontology Slim	GO:0005622
	cytoplasm	Gene Ontology Slim	GO:0005737
	mitochondrion	Gene Ontology Slim	GO:0005739
	peroxisome	Gene Ontology Slim	GO:0005777
	cytosol	Gene Ontology Slim	GO:0005829
	biosynthetic process	Gene Ontology Slim	GO:0009058
	organelle	Gene Ontology Slim	GO:0043226
////
Query:	Gene.93253::c150324.graph_c1::g.93253::m.93253
Gene:	ath:ArthCp030	rbcL
Entrez Gene ID:	844754
Pathway:	Metabolic pathways	KEGG PATHWAY	ath01100
	Biosynthesis of secondary metabolites	KEGG PATHWAY	ath01110
	Carbon metabolism	KEGG PATHWAY	ath01200
	Glyoxylate and dicarboxylate metabolism	KEGG PATHWAY	ath00630
	Carbon fixation in photosynthetic organisms	KEGG PATHWAY	ath00710
	oxygenic photosynthesis	BioCyc	PHOTOALL-PWY
	Rubisco shunt	BioCyc	PWY-5723
	Calvin-Benson-Bassham cycle	BioCyc	CALVIN-PWY
	photorespiration	BioCyc	PWY-181
////
Query:	Gene.2067::c104799.graph_c0::g.2067::m.2067
Gene:	ath:AT1G72330	ALAAT2
Entrez Gene ID:	843565
Pathway:	Metabolic pathways	KEGG PATHWAY	ath01100
	Biosynthesis of amino acids	KEGG PATHWAY	ath01230
	Carbon metabolism	KEGG PATHWAY	ath01200
	Carbon fixation in photosynthetic organisms	KEGG PATHWAY	ath00710
	2-Oxocarboxylic acid metabolism	KEGG PATHWAY	ath01210
	Alanine, aspartate and glutamate metabolism	KEGG PATHWAY	ath00250
	Arginine biosynthesis	KEGG PATHWAY	ath00220
GO:	response to hypoxia	Gene Ontology	GO:0001666
	L-alanine:2-oxoglutarate aminotransferase activity	Gene Ontology	GO:0004021
	copper ion binding	Gene Ontology	GO:0005507
	ATP binding	Gene Ontology	GO:0005524
	mitochondrion	Gene Ontology	GO:0005739
	cytosol	Gene Ontology	GO:0005829
	biosynthetic process	Gene Ontology	GO:0009058
	pyridoxal phosphate binding	Gene Ontology	GO:0030170
	L-alanine catabolic process	Gene Ontology	GO:0042853
////
Query:	Gene.17742::c123009.graph_c0::g.17742::m.17742
Gene:	ath:AT1G53240	mMDH1
Entrez Gene ID:	841757
Pathway:	Metabolic pathways	KEGG PATHWAY	ath01100
	Biosynthesis of secondary metabolites	KEGG PATHWAY	ath01110
	glyoxylate cycle	BioCyc	GLYOXYLATE-BYPASS
	Cysteine and methionine metabolism	KEGG PATHWAY	ath00270
	Carbon metabolism	KEGG PATHWAY	ath01200
	Pyruvate metabolism	KEGG PATHWAY	ath00620
	Glyoxylate and dicarboxylate metabolism	KEGG PATHWAY	ath00630
	Carbon fixation in photosynthetic organisms	KEGG PATHWAY	ath00710
	Citrate cycle (TCA cycle)	KEGG PATHWAY	ath00020
	gluconeogenesis III	BioCyc	PWY66-399
	TCA cycle II (plants and fungi)	BioCyc	PWY-5690
	gluconeogenesis I	BioCyc	GLUCONEO-PWY
	TCA cycle variation V (plant)	BioCyc	PWYQT-4481
	malate-oxaloacetate shuttle I	BioCyc	PWY-7047
	aspartate degradation II	BioCyc	MALATE-ASPARTATE-SHUTTLE-PWY
	superpathway of cytosolic glycolysis (plants), pyruvate dehydrogenase and TCA cycle	BioCyc	PWY-5464
GO:	copper ion binding	Gene Ontology	GO:0005507
	cell wall	Gene Ontology	GO:0005618
	nucleus	Gene Ontology	GO:0005634
	cytoplasm	Gene Ontology	GO:0005737
	mitochondrion	Gene Ontology	GO:0005739
	Golgi apparatus	Gene Ontology	GO:0005794
	cytosol	Gene Ontology	GO:0005829
	carbohydrate metabolic process	Gene Ontology	GO:0005975
	malate metabolic process	Gene Ontology	GO:0006108
	response to cold	Gene Ontology	GO:0009409
	chloroplast	Gene Ontology	GO:0009507
	L-malate dehydrogenase activity	Gene Ontology	GO:0030060
	defense response to bacterium	Gene Ontology	GO:0042742
	response to cadmium ion	Gene Ontology	GO:0046686
GOslim:	cell wall	Gene Ontology Slim	GO:0005618
	intracellular	Gene Ontology Slim	GO:0005622
	nucleus	Gene Ontology Slim	GO:0005634
	cytoplasm	Gene Ontology Slim	GO:0005737
	mitochondrion	Gene Ontology Slim	GO:0005739
	carbohydrate metabolic process	Gene Ontology Slim	GO:0005975
	external encapsulating structure	Gene Ontology Slim	GO:0030312
	organelle	Gene Ontology Slim	GO:0043226
////
Query:	Gene.49423::c139805.graph_c0::g.49423::m.49423
Gene:	ath:AT1G18270
Entrez Gene ID:	838407
GO:	nucleus	Gene Ontology	GO:0005634
	carbohydrate metabolic process	Gene Ontology	GO:0005975
	zinc ion binding	Gene Ontology	GO:0008270
	oxidoreductase activity	Gene Ontology	GO:0016491
	aldehyde-lyase activity	Gene Ontology	GO:0016832
	NADP binding	Gene Ontology	GO:0050661
	NAD binding	Gene Ontology	GO:0051287
	oxidation-reduction process	Gene Ontology	GO:0055114
////
Query:	Gene.84226::c148622.graph_c0::g.84226::m.84226
Gene:	ath:AT2G45290
Entrez Gene ID:	819137
Pathway:	Metabolic pathways	KEGG PATHWAY	ath01100
	Biosynthesis of secondary metabolites	KEGG PATHWAY	ath01110
	Biosynthesis of amino acids	KEGG PATHWAY	ath01230
	pentose phosphate pathway	BioCyc	PENTOSE-P-PWY
	Carbon metabolism	KEGG PATHWAY	ath01200
	Pentose phosphate pathway	KEGG PATHWAY	ath00030
	Carbon fixation in photosynthetic organisms	KEGG PATHWAY	ath00710
	oxygenic photosynthesis	BioCyc	PHOTOALL-PWY
	pentose phosphate pathway (non-oxidative branch)	BioCyc	NONOXIPENT-PWY
	Rubisco shunt	BioCyc	PWY-5723
	Calvin-Benson-Bassham cycle	BioCyc	CALVIN-PWY
GO:	transketolase activity	Gene Ontology	GO:0004802
	cytosol	Gene Ontology	GO:0005829
	pentose-phosphate shunt	Gene Ontology	GO:0006098
	chloroplast	Gene Ontology	GO:0009507
	plastid	Gene Ontology	GO:0009536
	chloroplast stroma	Gene Ontology	GO:0009570
	reductive pentose-phosphate cycle	Gene Ontology	GO:0019253
	response to cadmium ion	Gene Ontology	GO:0046686
GOslim:	intracellular	Gene Ontology Slim	GO:0005622
	cytoplasm	Gene Ontology Slim	GO:0005737
	cytosol	Gene Ontology Slim	GO:0005829
	plastid	Gene Ontology Slim	GO:0009536
	organelle	Gene Ontology Slim	GO:0043226
////
Query:	Gene.88617::c149461.graph_c0::g.88617::m.88617
Gene:	ath:AT1G79530	GAPCP-1
Entrez Gene ID:	844291
Pathway:	Metabolic pathways	KEGG PATHWAY	ath01100
	Biosynthesis of secondary metabolites	KEGG PATHWAY	ath01110
	Biosynthesis of amino acids	KEGG PATHWAY	ath01230
	Carbon metabolism	KEGG PATHWAY	ath01200
	Huntington disease	PANTHER	P00029
	Glycolysis / Gluconeogenesis	KEGG PATHWAY	ath00010
	Carbon fixation in photosynthetic organisms	KEGG PATHWAY	ath00710
GO:	glyceraldehyde-3-phosphate dehydrogenase (NAD+) (phosphorylating) activity	Gene Ontology	GO:0004365
	copper ion binding	Gene Ontology	GO:0005507
	cytosol	Gene Ontology	GO:0005829
	carbohydrate metabolic process	Gene Ontology	GO:0005975
	glucose metabolic process	Gene Ontology	GO:0006006
	glycolytic process	Gene Ontology	GO:0006096
	zinc ion binding	Gene Ontology	GO:0008270
	chloroplast	Gene Ontology	GO:0009507
	plastid	Gene Ontology	GO:0009536
	pollen development	Gene Ontology	GO:0009555
	anther wall tapetum development	Gene Ontology	GO:0048658
	NADP binding	Gene Ontology	GO:0050661
	NAD binding	Gene Ontology	GO:0051287
	primary root development	Gene Ontology	GO:0080022
	amino acid homeostasis	Gene Ontology	GO:0080144
GOslim:	intracellular	Gene Ontology Slim	GO:0005622
	cytoplasm	Gene Ontology Slim	GO:0005737
	cytosol	Gene Ontology Slim	GO:0005829
	carbohydrate metabolic process	Gene Ontology Slim	GO:0005975
	plastid	Gene Ontology Slim	GO:0009536
	organelle	Gene Ontology Slim	GO:0043226

## Sheet: proteome
ath00710 Carbon fixation in photosynthetic organisms	0.130785	c13640_f9p10_1645	"glyceraldehyde-3-phosphate dehydrogenase B, chloroplastic"
ath00710 Carbon fixation in photosynthetic organisms	0.130785	c25722_f3p4_2785	"transketolase, chloroplastic"
ath00710 Carbon fixation in photosynthetic organisms	0.130785	c17718_f2p0_1225	"malate dehydrogenase, glyoxysomal"
ath00710 Carbon fixation in photosynthetic organisms	0.130785	c9162_f1p2_2755	malate dehydrogenase
ath00710 Carbon fixation in photosynthetic organisms	0.130785	c30304.1_c0_orf1	"ribulose bisphosphate carboxylase small chain, chloroplastic isoform X1"
ath00710 Carbon fixation in photosynthetic organisms	0.130785	c20368_f4p1_1677	"glyceraldehyde-3-phosphate dehydrogenase GAPCP2, chloroplastic-like"
ath00710 Carbon fixation in photosynthetic organisms	0.130785	c44520_f7p1_2153	NADP-dependent malic enzyme-like isoform X2
ath00710 Carbon fixation in photosynthetic organisms	0.130785	c20365_f1p10_1411	"phosphoglycerate kinase, cytosolic"
