# Supplementary material for: Multi-Approach Analysis Reveals Pathways of Cold Tolerance Divergence in Camellia japonica
Source: Front Plant Sci. 2022 Feb 25;13:811791. doi: 10.3389/fpls.2022.811791 (PMC8914472; doi:10.3389/fpls.2022.811791)
Supplement: Supplementary Table 11 — The annotation of ribosome. [file Table_11.XLSX]

## Sheet: transcriptome
#Query	Gene ID|Gene name|Hyperlink
Gene.1060::c103361.graph_c0::g.1060::m.1060	ath:AT3G28500||http://www.genome.jp/dbget-bin/www_bget?ath:AT3G28500
Gene.1216::c103616.graph_c0::g.1216::m.1216	ath:AT1G29965||http://www.genome.jp/dbget-bin/www_bget?ath:AT1G29965
Gene.1488::c104046.graph_c0::g.1488::m.1488	ath:AT3G11510||http://www.genome.jp/dbget-bin/www_bget?ath:AT3G11510
Gene.1520::c104083.graph_c0::g.1520::m.1520	ath:AT3G56340||http://www.genome.jp/dbget-bin/www_bget?ath:AT3G56340
Gene.1617::c104204.graph_c0::g.1617::m.1617	ath:AT4G30800||http://www.genome.jp/dbget-bin/www_bget?ath:AT4G30800
Gene.3802::c107085.graph_c0::g.3802::m.3802	ath:AT1G77940||http://www.genome.jp/dbget-bin/www_bget?ath:AT1G77940
Gene.4213::c107725.graph_c0::g.4213::m.4213	ath:AT5G23900||http://www.genome.jp/dbget-bin/www_bget?ath:AT5G23900
Gene.11022::c116253.graph_c0::g.11022::m.11022	ath:AT5G52650||http://www.genome.jp/dbget-bin/www_bget?ath:AT5G52650
Gene.12394::c118067.graph_c0::g.12394::m.12394	ath:AT2G21580||http://www.genome.jp/dbget-bin/www_bget?ath:AT2G21580
Gene.12822::c118451.graph_c0::g.12822::m.12822	ath:AT5G10360|EMB3010|http://www.genome.jp/dbget-bin/www_bget?ath:AT5G10360
Gene.15747::c121332.graph_c0::g.15747::m.15747	ath:AT5G28060||http://www.genome.jp/dbget-bin/www_bget?ath:AT5G28060
Gene.16668::c122194.graph_c0::g.16668::m.16668	ath:AT4G33865||http://www.genome.jp/dbget-bin/www_bget?ath:AT4G33865
Gene.17665::c122957.graph_c0::g.17665::m.17665	ath:AT5G59240||http://www.genome.jp/dbget-bin/www_bget?ath:AT5G59240
Gene.18599::c123454.graph_c0::g.18599::m.18599	ath:AT5G15520||http://www.genome.jp/dbget-bin/www_bget?ath:AT5G15520
Gene.19385::c123961.graph_c0::g.19385::m.19385	ath:AT1G09590||http://www.genome.jp/dbget-bin/www_bget?ath:AT1G09590
Gene.19450::c124026.graph_c0::g.19450::m.19450	ath:AT3G56340||http://www.genome.jp/dbget-bin/www_bget?ath:AT3G56340
Gene.19754::c124194.graph_c0::g.19754::m.19754	ath:AT3G57490||http://www.genome.jp/dbget-bin/www_bget?ath:AT3G57490
Gene.19875::c124259.graph_c0::g.19875::m.19875	ath:AT1G08360||http://www.genome.jp/dbget-bin/www_bget?ath:AT1G08360
Gene.22229::c126342.graph_c0::g.22229::m.22229	ath:AT3G05590|RPL18|http://www.genome.jp/dbget-bin/www_bget?ath:AT3G05590
Gene.23619::c127276.graph_c0::g.23619::m.23619	ath:AT4G34670||http://www.genome.jp/dbget-bin/www_bget?ath:AT4G34670
Gene.24013::c127566.graph_c0::g.24013::m.24013	ath:AT4G16720||http://www.genome.jp/dbget-bin/www_bget?ath:AT4G16720
Gene.26131::c128974.graph_c0::g.26131::m.26131	None
Gene.26360::c129102.graph_c0::g.26360::m.26360	ath:AT4G34555||http://www.genome.jp/dbget-bin/www_bget?ath:AT4G34555
Gene.26727::c129330.graph_c0::g.26727::m.26727	ath:AT4G36130||http://www.genome.jp/dbget-bin/www_bget?ath:AT4G36130
Gene.27213::c129626.graph_c0::g.27213::m.27213	ath:AT3G13580||http://www.genome.jp/dbget-bin/www_bget?ath:AT3G13580
Gene.28581::c130472.graph_c0::g.28581::m.28581	ath:AT1G15930||http://www.genome.jp/dbget-bin/www_bget?ath:AT1G15930
Gene.31480::c132087.graph_c0::g.31480::m.31480	ath:AT1G74050||http://www.genome.jp/dbget-bin/www_bget?ath:AT1G74050
Gene.32476::c132636.graph_c0::g.32476::m.32476	ath:AT2G20450||http://www.genome.jp/dbget-bin/www_bget?ath:AT2G20450
Gene.33156::c132975.graph_c0::g.33156::m.33156	ath:AT2G44065||http://www.genome.jp/dbget-bin/www_bget?ath:AT2G44065
Gene.33578::c133209.graph_c0::g.33578::m.33578	ath:AT1G52300||http://www.genome.jp/dbget-bin/www_bget?ath:AT1G52300
Gene.34235::c133529.graph_c0::g.34235::m.34235	ath:AT3G62870||http://www.genome.jp/dbget-bin/www_bget?ath:AT3G62870
Gene.35093::c133930.graph_c0::g.35093::m.35093	ath:AT5G62300||http://www.genome.jp/dbget-bin/www_bget?ath:AT5G62300
Gene.36065::c134395.graph_c0::g.36065::m.36065	ath:AT5G58420||http://www.genome.jp/dbget-bin/www_bget?ath:AT5G58420
Gene.36183::c134453.graph_c0::g.36183::m.36183	ath:AT3G49010|BBC1|http://www.genome.jp/dbget-bin/www_bget?ath:AT3G49010
Gene.46723::c138803.graph_c0::g.46723::m.46723	ath:AT5G56670||http://www.genome.jp/dbget-bin/www_bget?ath:AT5G56670
Gene.47176::c138980.graph_c0::g.47176::m.47176	ath:AT1G59359||http://www.genome.jp/dbget-bin/www_bget?ath:AT1G59359
Gene.51855::c140575.graph_c0::g.51855::m.51855	ath:AT3G44590||http://www.genome.jp/dbget-bin/www_bget?ath:AT3G44590
Gene.66754::c144781.graph_c0::g.66754::m.66754	ath:AT3G09630||http://www.genome.jp/dbget-bin/www_bget?ath:AT3G09630
Gene.89258::c149583.graph_c0::g.89258::m.89258	ath:AT3G55280|RPL23AB|http://www.genome.jp/dbget-bin/www_bget?ath:AT3G55280
Gene.91620::c150031.graph_c0::g.91620::m.91620	ath:AT1G72370|P40|http://www.genome.jp/dbget-bin/www_bget?ath:AT1G72370
Gene.138352::c157378.graph_c0::g.138352::m.138352	ath:AT1G70600||http://www.genome.jp/dbget-bin/www_bget?ath:AT1G70600
Gene.155010::c33370.graph_c0::g.155010::m.155010	ath:AT2G09990||http://www.genome.jp/dbget-bin/www_bget?ath:AT2G09990
Gene.159025::c53288.graph_c0::g.159025::m.159025	ath:AT3G53020|STV1|http://www.genome.jp/dbget-bin/www_bget?ath:AT3G53020
Gene.164230::c72316.graph_c0::g.164230::m.164230	ath:AT5G02610||http://www.genome.jp/dbget-bin/www_bget?ath:AT5G02610
Gene.165649::c79423.graph_c0::g.165649::m.165649	ath:AT1G48830||http://www.genome.jp/dbget-bin/www_bget?ath:AT1G48830
Gene.168262::c86139.graph_c0::g.168262::m.168262	ath:AT2G47110|UBQ6|http://www.genome.jp/dbget-bin/www_bget?ath:AT2G47110
Gene.169448::c88147.graph_c0::g.169448::m.169448	ath:AT4G14320||http://www.genome.jp/dbget-bin/www_bget?ath:AT4G14320
Gene.169786::c88377.graph_c0::g.169786::m.169786	ath:AT4G35490|MRPL11|http://www.genome.jp/dbget-bin/www_bget?ath:AT4G35490
Gene.171368::c89420.graph_c0::g.171368::m.171368	ath:AT5G02960||http://www.genome.jp/dbget-bin/www_bget?ath:AT5G02960
Gene.172331::c90074.graph_c0::g.172331::m.172331	ath:AT1G52300||http://www.genome.jp/dbget-bin/www_bget?ath:AT1G52300
Gene.37347::c134987.graph_c0::g.37347::m.37347	ath:AT3G53740||http://www.genome.jp/dbget-bin/www_bget?ath:AT3G53740
Gene.84455::c148667.graph_c0::g.84455::m.84455	ath:AT2G31610||http://www.genome.jp/dbget-bin/www_bget?ath:AT2G31610
Gene.94187::c150494.graph_c0::g.94187::m.94187	ath:AT2G42710||http://www.genome.jp/dbget-bin/www_bget?ath:AT2G42710
Gene.12040::c117625.graph_c0::g.12040::m.12040	ath:AT5G35530||http://www.genome.jp/dbget-bin/www_bget?ath:AT5G35530
Gene.15213::c120834.graph_c0::g.15213::m.15213	ath:AT5G02450||http://www.genome.jp/dbget-bin/www_bget?ath:AT5G02450
Gene.15428::c121012.graph_c0::g.15428::m.15428	ath:AT1G69620|RPL34|http://www.genome.jp/dbget-bin/www_bget?ath:AT1G69620
Gene.15731::c121313.graph_c0::g.15731::m.15731	ath:AT4G31985||http://www.genome.jp/dbget-bin/www_bget?ath:AT4G31985
Gene.18089::c123177.graph_c0::g.18089::m.18089	ath:AT3G59540||http://www.genome.jp/dbget-bin/www_bget?ath:AT3G59540
Gene.20679::c124972.graph_c0::g.20679::m.20679	ath:AT3G61110|RS27A|http://www.genome.jp/dbget-bin/www_bget?ath:AT3G61110
Gene.21957::c126189.graph_c0::g.21957::m.21957	ath:AT4G15000||http://www.genome.jp/dbget-bin/www_bget?ath:AT4G15000
Gene.23326::c127087.graph_c0::g.23326::m.23326	ath:AT3G05590|RPL18|http://www.genome.jp/dbget-bin/www_bget?ath:AT3G05590
Gene.23997::c127546.graph_c0::g.23997::m.23997	ath:AT5G04800||http://www.genome.jp/dbget-bin/www_bget?ath:AT5G04800
Gene.25382::c128434.graph_c0::g.25382::m.25382	ath:AT4G10450||http://www.genome.jp/dbget-bin/www_bget?ath:AT4G10450
Gene.26010::c128919.graph_c0::g.26010::m.26010	ath:AT1G07070||http://www.genome.jp/dbget-bin/www_bget?ath:AT1G07070
Gene.26048::c128935.graph_c0::g.26048::m.26048	ath:AT1G09590||http://www.genome.jp/dbget-bin/www_bget?ath:AT1G09590
Gene.27751::c129983.graph_c0::g.27751::m.27751	ath:AT1G74060||http://www.genome.jp/dbget-bin/www_bget?ath:AT1G74060
Gene.29700::c131135.graph_c0::g.29700::m.29700	ath:AT3G04400|emb2171|http://www.genome.jp/dbget-bin/www_bget?ath:AT3G04400
Gene.29732::c131144.graph_c0::g.29732::m.29732	ath:AT3G52580||http://www.genome.jp/dbget-bin/www_bget?ath:AT3G52580
Gene.30243::c131427.graph_c0::g.30243::m.30243	ath:AT4G09800|RPS18C|http://www.genome.jp/dbget-bin/www_bget?ath:AT4G09800
Gene.30981::c131833.graph_c0::g.30981::m.30981	ath:AT5G39740|RPL5B|http://www.genome.jp/dbget-bin/www_bget?ath:AT5G39740
Gene.33608::c133232.graph_c0::g.33608::m.33608	ath:AT4G18100||http://www.genome.jp/dbget-bin/www_bget?ath:AT4G18100
Gene.37739::c135156.graph_c0::g.37739::m.37739	ath:AT5G09500||http://www.genome.jp/dbget-bin/www_bget?ath:AT5G09500
Gene.40620::c136439.graph_c0::g.40620::m.40620	ath:AT2G19740||http://www.genome.jp/dbget-bin/www_bget?ath:AT2G19740
Gene.41785::c136919.graph_c0::g.41785::m.41785	ath:AT1G67430||http://www.genome.jp/dbget-bin/www_bget?ath:AT1G67430
Gene.42430::c137152.graph_c0::g.42430::m.42430	ath:AT2G01250||http://www.genome.jp/dbget-bin/www_bget?ath:AT2G01250
Gene.43508::c137597.graph_c0::g.43508::m.43508	ath:AT1G48830||http://www.genome.jp/dbget-bin/www_bget?ath:AT1G48830
Gene.45404::c138346.graph_c0::g.45404::m.45404	ath:AT2G18020|EMB2296|http://www.genome.jp/dbget-bin/www_bget?ath:AT2G18020
Gene.50291::c140080.graph_c0::g.50291::m.50291	ath:AT2G37270|RPS5B|http://www.genome.jp/dbget-bin/www_bget?ath:AT2G37270
Gene.51318::c140404.graph_c1::g.51318::m.51318	ath:AT2G40010||http://www.genome.jp/dbget-bin/www_bget?ath:AT2G40010
Gene.56007::c141869.graph_c0::g.56007::m.56007	ath:AT1G61580|RPL3B|http://www.genome.jp/dbget-bin/www_bget?ath:AT1G61580
Gene.60310::c143067.graph_c0::g.60310::m.60310	ath:AT2G27530|PGY1|http://www.genome.jp/dbget-bin/www_bget?ath:AT2G27530
Gene.74479::c146570.graph_c0::g.74479::m.74479	ath:AT4G16720||http://www.genome.jp/dbget-bin/www_bget?ath:AT4G16720
Gene.108026::c152852.graph_c1::g.108026::m.108026	ath:AT3G07110||http://www.genome.jp/dbget-bin/www_bget?ath:AT3G07110
Gene.156900::c41647.graph_c0::g.156900::m.156900	ath:AT3G02080||http://www.genome.jp/dbget-bin/www_bget?ath:AT3G02080
Gene.163542::c67487.graph_c0::g.163542::m.163542	ath:AT1G23410||http://www.genome.jp/dbget-bin/www_bget?ath:AT1G23410
GO Terms
Query:	Gene.1060::c103361.graph_c0::g.1060::m.1060
Gene:	ath:AT3G28500
Entrez Gene ID:	822480
Pathway:	Ribosome	KEGG PATHWAY	ath03010
GO:	cytoplasm	Gene Ontology	GO:0005737
	cytosol	Gene Ontology	GO:0005829
	plasma membrane	Gene Ontology	GO:0005886
	translational elongation	Gene Ontology	GO:0006414
	cytosolic ribosome	Gene Ontology	GO:0022626
GOslim:	intracellular	Gene Ontology Slim	GO:0005622
	cytoplasm	Gene Ontology Slim	GO:0005737
	cytosol	Gene Ontology Slim	GO:0005829
	plasma membrane	Gene Ontology Slim	GO:0005886
////
Query:	Gene.1216::c103616.graph_c0::g.1216::m.1216
Gene:	ath:AT1G29965
Entrez Gene ID:	839875
Pathway:	Ribosome	KEGG PATHWAY	ath03010
GO:	mRNA binding	Gene Ontology	GO:0003729
	nucleus	Gene Ontology	GO:0005634
	cytoplasm	Gene Ontology	GO:0005737
	cytosol	Gene Ontology	GO:0005829
	translation	Gene Ontology	GO:0006412
	plasmodesma	Gene Ontology	GO:0009506
	cytosolic large ribosomal subunit	Gene Ontology	GO:0022625
GOslim:	intracellular	Gene Ontology Slim	GO:0005622
	nucleus	Gene Ontology Slim	GO:0005634
	cytoplasm	Gene Ontology Slim	GO:0005737
	cytosol	Gene Ontology Slim	GO:0005829
	translation	Gene Ontology Slim	GO:0006412
	biosynthetic process	Gene Ontology Slim	GO:0009058
	cellular nitrogen compound metabolic process	Gene Ontology Slim	GO:0034641
	organelle	Gene Ontology Slim	GO:0043226
////
Query:	Gene.1488::c104046.graph_c0::g.1488::m.1488
Gene:	ath:AT3G11510
Entrez Gene ID:	820324
Pathway:	Ribosome	KEGG PATHWAY	ath03010
GO:	ribosomal small subunit assembly	Gene Ontology	GO:0000028
	maturation of SSU-rRNA from tricistronic rRNA transcript (SSU-rRNA, 5.8S rRNA, LSU-rRNA)	Gene Ontology	GO:0000462
	mRNA binding	Gene Ontology	GO:0003729
	structural constituent of ribosome	Gene Ontology	GO:0003735
	nucleolus	Gene Ontology	GO:0005730
	cytoplasm	Gene Ontology	GO:0005737
	cytosol	Gene Ontology	GO:0005829
	translation	Gene Ontology	GO:0006412
	cytosolic ribosome	Gene Ontology	GO:0022626
	cytosolic small ribosomal subunit	Gene Ontology	GO:0022627
	mRNA 5'-UTR binding	Gene Ontology	GO:0048027
	small ribosomal subunit rRNA binding	Gene Ontology	GO:0070181
GOslim:	RNA binding	Gene Ontology Slim	GO:0003723
	mRNA binding	Gene Ontology Slim	GO:0003729
	structural constituent of ribosome	Gene Ontology Slim	GO:0003735
	structural molecule activity	Gene Ontology Slim	GO:0005198
	intracellular	Gene Ontology Slim	GO:0005622
	nucleus	Gene Ontology Slim	GO:0005634
	nucleolus	Gene Ontology Slim	GO:0005730
	cytoplasm	Gene Ontology Slim	GO:0005737
	cytosol	Gene Ontology Slim	GO:0005829
	translation	Gene Ontology Slim	GO:0006412
	biosynthetic process	Gene Ontology Slim	GO:0009058
	cellular nitrogen compound metabolic process	Gene Ontology Slim	GO:0034641
	organelle	Gene Ontology Slim	GO:0043226
////
Query:	Gene.1520::c104083.graph_c0::g.1520::m.1520
Gene:	ath:AT3G56340
Entrez Gene ID:	824801
Pathway:	Ribosome	KEGG PATHWAY	ath03010
GOslim:	RNA binding	Gene Ontology Slim	GO:0003723
	mRNA binding	Gene Ontology Slim	GO:0003729
	structural constituent of ribosome	Gene Ontology Slim	GO:0003735
	structural molecule activity	Gene Ontology Slim	GO:0005198
	intracellular	Gene Ontology Slim	GO:0005622
	cytoplasm	Gene Ontology Slim	GO:0005737
	cytosol	Gene Ontology Slim	GO:0005829
	translation	Gene Ontology Slim	GO:0006412
	biosynthetic process	Gene Ontology Slim	GO:0009058
	cellular nitrogen compound metabolic process	Gene Ontology Slim	GO:0034641
////
Query:	Gene.1617::c104204.graph_c0::g.1617::m.1617
Gene:	ath:AT4G30800
Entrez Gene ID:	829203
Pathway:	Ribosome	KEGG PATHWAY	ath03010
GO:	mRNA binding	Gene Ontology	GO:0003729
	structural constituent of ribosome	Gene Ontology	GO:0003735
	cytoplasm	Gene Ontology	GO:0005737
	cytosol	Gene Ontology	GO:0005829
	plasma membrane	Gene Ontology	GO:0005886
	translation	Gene Ontology	GO:0006412
	cytosolic small ribosomal subunit	Gene Ontology	GO:0022627
GOslim:	RNA binding	Gene Ontology Slim	GO:0003723
	structural constituent of ribosome	Gene Ontology Slim	GO:0003735
	structural molecule activity	Gene Ontology Slim	GO:0005198
	intracellular	Gene Ontology Slim	GO:0005622
	cytoplasm	Gene Ontology Slim	GO:0005737
	plasma membrane	Gene Ontology Slim	GO:0005886
	translation	Gene Ontology Slim	GO:0006412
	biosynthetic process	Gene Ontology Slim	GO:0009058
	rRNA binding	Gene Ontology Slim	GO:0019843
	cellular nitrogen compound metabolic process	Gene Ontology Slim	GO:0034641
////
Query:	Gene.3802::c107085.graph_c0::g.3802::m.3802
Gene:	ath:AT1G77940
Entrez Gene ID:	844129
Pathway:	Ribosome	KEGG PATHWAY	ath03010
GO:	RNA binding	Gene Ontology	GO:0003723
	mRNA binding	Gene Ontology	GO:0003729
	structural constituent of ribosome	Gene Ontology	GO:0003735
	cytoplasm	Gene Ontology	GO:0005737
	mitochondrion	Gene Ontology	GO:0005739
	cytosol	Gene Ontology	GO:0005829
	cytosolic large ribosomal subunit	Gene Ontology	GO:0022625
	cytosolic ribosome	Gene Ontology	GO:0022626
GOslim:	RNA binding	Gene Ontology Slim	GO:0003723
	structural constituent of ribosome	Gene Ontology Slim	GO:0003735
	structural molecule activity	Gene Ontology Slim	GO:0005198
	intracellular	Gene Ontology Slim	GO:0005622
	cytoplasm	Gene Ontology Slim	GO:0005737
	mitochondrion	Gene Ontology Slim	GO:0005739
	organelle	Gene Ontology Slim	GO:0043226
////
Query:	Gene.4213::c107725.graph_c0::g.4213::m.4213
Gene:	ath:AT5G23900
Entrez Gene ID:	832455
Pathway:	Ribosome	KEGG PATHWAY	ath03010
GO:	RNA binding	Gene Ontology	GO:0003723
	cytoplasm	Gene Ontology	GO:0005737
	translation	Gene Ontology	GO:0006412
	plastid	Gene Ontology	GO:0009536
	cytosolic large ribosomal subunit	Gene Ontology	GO:0022625
	cytosolic ribosome	Gene Ontology	GO:0022626
GOslim:	intracellular	Gene Ontology Slim	GO:0005622
	cytoplasm	Gene Ontology Slim	GO:0005737
	translation	Gene Ontology Slim	GO:0006412
	biosynthetic process	Gene Ontology Slim	GO:0009058
	plastid	Gene Ontology Slim	GO:0009536
	cellular nitrogen compound metabolic process	Gene Ontology Slim	GO:0034641
	organelle	Gene Ontology Slim	GO:0043226
////
Query:	Gene.11022::c116253.graph_c0::g.11022::m.11022
Gene:	ath:AT5G52650
Entrez Gene ID:	835342
Pathway:	Ribosome	KEGG PATHWAY	ath03010
GO:	ribosomal small subunit assembly	Gene Ontology	GO:0000028
	RNA binding	Gene Ontology	GO:0003723
	mRNA binding	Gene Ontology	GO:0003729
	structural constituent of ribosome	Gene Ontology	GO:0003735
	protein binding	Gene Ontology	GO:0005515
	cell wall	Gene Ontology	GO:0005618
	cytoplasm	Gene Ontology	GO:0005737
	cytosol	Gene Ontology	GO:0005829
	plastid	Gene Ontology	GO:0009536
	cytosolic ribosome	Gene Ontology	GO:0022626
	cytosolic small ribosomal subunit	Gene Ontology	GO:0022627
GOslim:	RNA binding	Gene Ontology Slim	GO:0003723
	mRNA binding	Gene Ontology Slim	GO:0003729
	structural constituent of ribosome	Gene Ontology Slim	GO:0003735
	structural molecule activity	Gene Ontology Slim	GO:0005198
	cell wall	Gene Ontology Slim	GO:0005618
	intracellular	Gene Ontology Slim	GO:0005622
	cytoplasm	Gene Ontology Slim	GO:0005737
	plastid	Gene Ontology Slim	GO:0009536
	external encapsulating structure	Gene Ontology Slim	GO:0030312
	organelle	Gene Ontology Slim	GO:0043226
////
Query:	Gene.12394::c118067.graph_c0::g.12394::m.12394
Gene:	ath:AT2G21580
Entrez Gene ID:	816696
Pathway:	Ribosome	KEGG PATHWAY	ath03010
GO:	mRNA binding	Gene Ontology	GO:0003729
	structural constituent of ribosome	Gene Ontology	GO:0003735
	cytoplasm	Gene Ontology	GO:0005737
	vacuole	Gene Ontology	GO:0005773
	vacuolar membrane	Gene Ontology	GO:0005774
	Golgi apparatus	Gene Ontology	GO:0005794
	plasmodesma	Gene Ontology	GO:0009506
	cytosolic ribosome	Gene Ontology	GO:0022626
	cytosolic small ribosomal subunit	Gene Ontology	GO:0022627
GOslim:	intracellular	Gene Ontology Slim	GO:0005622
	cytoplasm	Gene Ontology Slim	GO:0005737
	vacuole	Gene Ontology Slim	GO:0005773
	organelle	Gene Ontology Slim	GO:0043226
////
Query:	Gene.12822::c118451.graph_c0::g.12822::m.12822
Gene:	ath:AT5G10360	EMB3010
Entrez Gene ID:	830900
Pathway:	Ribosome	KEGG PATHWAY	ath03010
GO:	mRNA binding	Gene Ontology	GO:0003729
	structural constituent of ribosome	Gene Ontology	GO:0003735
	nucleus	Gene Ontology	GO:0005634
	cytosol	Gene Ontology	GO:0005829
	plasma membrane	Gene Ontology	GO:0005886
	translation	Gene Ontology	GO:0006412
	plasmodesma	Gene Ontology	GO:0009506
	embryo development ending in seed dormancy	Gene Ontology	GO:0009793
	cytosolic ribosome	Gene Ontology	GO:0022626
	cytosolic small ribosomal subunit	Gene Ontology	GO:0022627
GOslim:	RNA binding	Gene Ontology Slim	GO:0003723
	mRNA binding	Gene Ontology Slim	GO:0003729
	intracellular	Gene Ontology Slim	GO:0005622
	nucleus	Gene Ontology Slim	GO:0005634
	cytoplasm	Gene Ontology Slim	GO:0005737
	cytosol	Gene Ontology Slim	GO:0005829
	plasma membrane	Gene Ontology Slim	GO:0005886
	translation	Gene Ontology Slim	GO:0006412
	biosynthetic process	Gene Ontology Slim	GO:0009058
	cellular nitrogen compound metabolic process	Gene Ontology Slim	GO:0034641
	organelle	Gene Ontology Slim	GO:0043226
////
Query:	Gene.15747::c121332.graph_c0::g.15747::m.15747
Gene:	ath:AT5G28060
Entrez Gene ID:	832878
Pathway:	Ribosome	KEGG PATHWAY	ath03010
GOslim:	cell wall	Gene Ontology Slim	GO:0005618
	intracellular	Gene Ontology Slim	GO:0005622
	cytoplasm	Gene Ontology Slim	GO:0005737
	translation	Gene Ontology Slim	GO:0006412
	biosynthetic process	Gene Ontology Slim	GO:0009058
	plastid	Gene Ontology Slim	GO:0009536
	external encapsulating structure	Gene Ontology Slim	GO:0030312
	cellular nitrogen compound metabolic process	Gene Ontology Slim	GO:0034641
	organelle	Gene Ontology Slim	GO:0043226
////
Query:	Gene.16668::c122194.graph_c0::g.16668::m.16668
Gene:	ath:AT4G33865
Entrez Gene ID:	829529
Pathway:	Ribosome	KEGG PATHWAY	ath03010
GO:	plasma membrane	Gene Ontology	GO:0005886
	translation	Gene Ontology	GO:0006412
	cytosolic small ribosomal subunit	Gene Ontology	GO:0022627
GOslim:	structural constituent of ribosome	Gene Ontology Slim	GO:0003735
	structural molecule activity	Gene Ontology Slim	GO:0005198
	intracellular	Gene Ontology Slim	GO:0005622
	cytoplasm	Gene Ontology Slim	GO:0005737
	cytosol	Gene Ontology Slim	GO:0005829
	plasma membrane	Gene Ontology Slim	GO:0005886
	translation	Gene Ontology Slim	GO:0006412
	biosynthetic process	Gene Ontology Slim	GO:0009058
	cellular nitrogen compound metabolic process	Gene Ontology Slim	GO:0034641
////
Query:	Gene.17665::c122957.graph_c0::g.17665::m.17665
Gene:	ath:AT5G59240
Entrez Gene ID:	836042
Pathway:	Ribosome	KEGG PATHWAY	ath03010
GO:	maturation of SSU-rRNA from tricistronic rRNA transcript (SSU-rRNA, 5.8S rRNA, LSU-rRNA)	Gene Ontology	GO:0000462
	structural constituent of ribosome	Gene Ontology	GO:0003735
	cytoplasm	Gene Ontology	GO:0005737
	translation	Gene Ontology	GO:0006412
	cytosolic ribosome	Gene Ontology	GO:0022626
	cytosolic small ribosomal subunit	Gene Ontology	GO:0022627
GOslim:	structural constituent of ribosome	Gene Ontology Slim	GO:0003735
	structural molecule activity	Gene Ontology Slim	GO:0005198
	intracellular	Gene Ontology Slim	GO:0005622
	cytoplasm	Gene Ontology Slim	GO:0005737
	translation	Gene Ontology Slim	GO:0006412
	biosynthetic process	Gene Ontology Slim	GO:0009058
	cellular nitrogen compound metabolic process	Gene Ontology Slim	GO:0034641
////
Query:	Gene.18599::c123454.graph_c0::g.18599::m.18599
Gene:	ath:AT5G15520
Entrez Gene ID:	831405
Pathway:	Ribosome	KEGG PATHWAY	ath03010
GO:	ribosomal small subunit assembly	Gene Ontology	GO:0000028
	RNA binding	Gene Ontology	GO:0003723
	mRNA binding	Gene Ontology	GO:0003729
	structural constituent of ribosome	Gene Ontology	GO:0003735
	nucleus	Gene Ontology	GO:0005634
	nucleolus	Gene Ontology	GO:0005730
	cytosol	Gene Ontology	GO:0005829
	translation	Gene Ontology	GO:0006412
	plasmodesma	Gene Ontology	GO:0009506
	cytosolic small ribosomal subunit	Gene Ontology	GO:0022627
GOslim:	RNA binding	Gene Ontology Slim	GO:0003723
	mRNA binding	Gene Ontology Slim	GO:0003729
	structural constituent of ribosome	Gene Ontology Slim	GO:0003735
	structural molecule activity	Gene Ontology Slim	GO:0005198
	intracellular	Gene Ontology Slim	GO:0005622
	nucleus	Gene Ontology Slim	GO:0005634
	nucleolus	Gene Ontology Slim	GO:0005730
	cytoplasm	Gene Ontology Slim	GO:0005737
	cytosol	Gene Ontology Slim	GO:0005829
	translation	Gene Ontology Slim	GO:0006412
	biosynthetic process	Gene Ontology Slim	GO:0009058
	cellular nitrogen compound metabolic process	Gene Ontology Slim	GO:0034641
	organelle	Gene Ontology Slim	GO:0043226
////
Query:	Gene.19385::c123961.graph_c0::g.19385::m.19385
Gene:	ath:AT1G09590
Entrez Gene ID:	837486
Pathway:	Ribosome	KEGG PATHWAY	ath03010
GO:	structural constituent of ribosome	Gene Ontology	GO:0003735
	extracellular region	Gene Ontology	GO:0005576
	nucleolus	Gene Ontology	GO:0005730
	cytoplasm	Gene Ontology	GO:0005737
	cytosolic large ribosomal subunit	Gene Ontology	GO:0022625
	cytosolic ribosome	Gene Ontology	GO:0022626
GOslim:	structural constituent of ribosome	Gene Ontology Slim	GO:0003735
	structural molecule activity	Gene Ontology Slim	GO:0005198
	extracellular region	Gene Ontology Slim	GO:0005576
	intracellular	Gene Ontology Slim	GO:0005622
	nucleus	Gene Ontology Slim	GO:0005634
	nucleolus	Gene Ontology Slim	GO:0005730
	cytoplasm	Gene Ontology Slim	GO:0005737
	translation	Gene Ontology Slim	GO:0006412
	biosynthetic process	Gene Ontology Slim	GO:0009058
	cellular nitrogen compound metabolic process	Gene Ontology Slim	GO:0034641
	organelle	Gene Ontology Slim	GO:0043226
////
Query:	Gene.19450::c124026.graph_c0::g.19450::m.19450
Gene:	ath:AT3G56340
Entrez Gene ID:	824801
Pathway:	Ribosome	KEGG PATHWAY	ath03010
GOslim:	RNA binding	Gene Ontology Slim	GO:0003723
	mRNA binding	Gene Ontology Slim	GO:0003729
	structural constituent of ribosome	Gene Ontology Slim	GO:0003735
	structural molecule activity	Gene Ontology Slim	GO:0005198
	intracellular	Gene Ontology Slim	GO:0005622
	cytoplasm	Gene Ontology Slim	GO:0005737
	cytosol	Gene Ontology Slim	GO:0005829
	translation	Gene Ontology Slim	GO:0006412
	biosynthetic process	Gene Ontology Slim	GO:0009058
	cellular nitrogen compound metabolic process	Gene Ontology Slim	GO:0034641
////
Query:	Gene.19754::c124194.graph_c0::g.19754::m.19754
Gene:	ath:AT3G57490
Entrez Gene ID:	824916
Pathway:	Ribosome	KEGG PATHWAY	ath03010
GO:	RNA binding	Gene Ontology	GO:0003723
	mRNA binding	Gene Ontology	GO:0003729
	structural constituent of ribosome	Gene Ontology	GO:0003735
	cytosol	Gene Ontology	GO:0005829
	translation	Gene Ontology	GO:0006412
	plasmodesma	Gene Ontology	GO:0009506
	cytosolic small ribosomal subunit	Gene Ontology	GO:0022627
GOslim:	RNA binding	Gene Ontology Slim	GO:0003723
	structural constituent of ribosome	Gene Ontology Slim	GO:0003735
	structural molecule activity	Gene Ontology Slim	GO:0005198
	intracellular	Gene Ontology Slim	GO:0005622
	cytoplasm	Gene Ontology Slim	GO:0005737
	cytosol	Gene Ontology Slim	GO:0005829
	translation	Gene Ontology Slim	GO:0006412
	biosynthetic process	Gene Ontology Slim	GO:0009058
	cellular nitrogen compound metabolic process	Gene Ontology Slim	GO:0034641
////
Query:	Gene.19875::c124259.graph_c0::g.19875::m.19875
Gene:	ath:AT1G08360
Entrez Gene ID:	837356
Pathway:	Ribosome	KEGG PATHWAY	ath03010
GO:	maturation of LSU-rRNA	Gene Ontology	GO:0000470
	RNA binding	Gene Ontology	GO:0003723
	extracellular region	Gene Ontology	GO:0005576
	cytoplasm	Gene Ontology	GO:0005737
	cytosol	Gene Ontology	GO:0005829
	plasma membrane	Gene Ontology	GO:0005886
	translation	Gene Ontology	GO:0006412
	plasmodesma	Gene Ontology	GO:0009506
	cytosolic large ribosomal subunit	Gene Ontology	GO:0022625
	cytosolic ribosome	Gene Ontology	GO:0022626
GOslim:	RNA binding	Gene Ontology Slim	GO:0003723
	extracellular region	Gene Ontology Slim	GO:0005576
	intracellular	Gene Ontology Slim	GO:0005622
	cytoplasm	Gene Ontology Slim	GO:0005737
	cytosol	Gene Ontology Slim	GO:0005829
	plasma membrane	Gene Ontology Slim	GO:0005886
	translation	Gene Ontology Slim	GO:0006412
	biosynthetic process	Gene Ontology Slim	GO:0009058
	cellular nitrogen compound metabolic process	Gene Ontology Slim	GO:0034641
////
Query:	Gene.22229::c126342.graph_c0::g.22229::m.22229
Gene:	ath:AT3G05590	RPL18
Entrez Gene ID:	819725
Pathway:	Ribosome	KEGG PATHWAY	ath03010
GO:	RNA binding	Gene Ontology	GO:0003723
	mRNA binding	Gene Ontology	GO:0003729
	structural constituent of ribosome	Gene Ontology	GO:0003735
	protein binding	Gene Ontology	GO:0005515
	cytoplasm	Gene Ontology	GO:0005737
	vacuole	Gene Ontology	GO:0005773
	vacuolar membrane	Gene Ontology	GO:0005774
	Golgi apparatus	Gene Ontology	GO:0005794
	cytosol	Gene Ontology	GO:0005829
	plasma membrane	Gene Ontology	GO:0005886
	translation	Gene Ontology	GO:0006412
	chloroplast	Gene Ontology	GO:0009507
	large ribosomal subunit	Gene Ontology	GO:0015934
	cytosolic large ribosomal subunit	Gene Ontology	GO:0022625
GOslim:	structural constituent of ribosome	Gene Ontology Slim	GO:0003735
	structural molecule activity	Gene Ontology Slim	GO:0005198
	intracellular	Gene Ontology Slim	GO:0005622
	cytoplasm	Gene Ontology Slim	GO:0005737
	vacuole	Gene Ontology Slim	GO:0005773
	cytosol	Gene Ontology Slim	GO:0005829
	plasma membrane	Gene Ontology Slim	GO:0005886
	translation	Gene Ontology Slim	GO:0006412
	biosynthetic process	Gene Ontology Slim	GO:0009058
	cellular nitrogen compound metabolic process	Gene Ontology Slim	GO:0034641
	organelle	Gene Ontology Slim	GO:0043226
////
Query:	Gene.23619::c127276.graph_c0::g.23619::m.23619
Gene:	ath:AT4G34670
Entrez Gene ID:	829619
Pathway:	Ribosome	KEGG PATHWAY	ath03010
GO:	mRNA binding	Gene Ontology	GO:0003729
	cell wall	Gene Ontology	GO:0005618
	nucleolus	Gene Ontology	GO:0005730
	cytoplasm	Gene Ontology	GO:0005737
	Golgi apparatus	Gene Ontology	GO:0005794
	cytosol	Gene Ontology	GO:0005829
	plasma membrane	Gene Ontology	GO:0005886
	plasmodesma	Gene Ontology	GO:0009506
	cytosolic ribosome	Gene Ontology	GO:0022626
	cytosolic small ribosomal subunit	Gene Ontology	GO:0022627
GOslim:	RNA binding	Gene Ontology Slim	GO:0003723
	mRNA binding	Gene Ontology Slim	GO:0003729
	cell wall	Gene Ontology Slim	GO:0005618
	intracellular	Gene Ontology Slim	GO:0005622
	nucleus	Gene Ontology Slim	GO:0005634
	nucleolus	Gene Ontology Slim	GO:0005730
	cytoplasm	Gene Ontology Slim	GO:0005737
	cytosol	Gene Ontology Slim	GO:0005829
	plasma membrane	Gene Ontology Slim	GO:0005886
	external encapsulating structure	Gene Ontology Slim	GO:0030312
	organelle	Gene Ontology Slim	GO:0043226
////
Query:	Gene.24013::c127566.graph_c0::g.24013::m.24013
Gene:	ath:AT4G16720
Entrez Gene ID:	827375
Pathway:	Ribosome	KEGG PATHWAY	ath03010
GO:	cytoplasmic translation	Gene Ontology	GO:0002181
	RNA binding	Gene Ontology	GO:0003723
	mRNA binding	Gene Ontology	GO:0003729
	structural constituent of ribosome	Gene Ontology	GO:0003735
	cytoplasm	Gene Ontology	GO:0005737
	vacuolar membrane	Gene Ontology	GO:0005774
	Golgi apparatus	Gene Ontology	GO:0005794
	cytosol	Gene Ontology	GO:0005829
	plasma membrane	Gene Ontology	GO:0005886
	cytosolic large ribosomal subunit	Gene Ontology	GO:0022625
	cytosolic ribosome	Gene Ontology	GO:0022626
GOslim:	RNA binding	Gene Ontology Slim	GO:0003723
	structural constituent of ribosome	Gene Ontology Slim	GO:0003735
	structural molecule activity	Gene Ontology Slim	GO:0005198
	intracellular	Gene Ontology Slim	GO:0005622
	cytoplasm	Gene Ontology Slim	GO:0005737
	cytosol	Gene Ontology Slim	GO:0005829
	plasma membrane	Gene Ontology Slim	GO:0005886
////
Query:	Gene.26131::c128974.graph_c0::g.26131::m.26131
////
Query:	Gene.26360::c129102.graph_c0::g.26360::m.26360
Gene:	ath:AT4G34555
Entrez Gene ID:	829607
Pathway:	Ribosome	KEGG PATHWAY	ath03010
GO:	structural constituent of ribosome	Gene Ontology	GO:0003735
	cytoplasm	Gene Ontology	GO:0005737
	Golgi apparatus	Gene Ontology	GO:0005794
	plasma membrane	Gene Ontology	GO:0005886
	cytosolic small ribosomal subunit	Gene Ontology	GO:0022627
GOslim:	structural constituent of ribosome	Gene Ontology Slim	GO:0003735
	structural molecule activity	Gene Ontology Slim	GO:0005198
	intracellular	Gene Ontology Slim	GO:0005622
	cytoplasm	Gene Ontology Slim	GO:0005737
	plasma membrane	Gene Ontology Slim	GO:0005886
////
Query:	Gene.26727::c129330.graph_c0::g.26727::m.26727
Gene:	ath:AT4G36130
Entrez Gene ID:	829770
Pathway:	Ribosome	KEGG PATHWAY	ath03010
GO:	cytoplasmic translation	Gene Ontology	GO:0002181
	RNA binding	Gene Ontology	GO:0003723
	mRNA binding	Gene Ontology	GO:0003729
	structural constituent of ribosome	Gene Ontology	GO:0003735
	cytoplasm	Gene Ontology	GO:0005737
	vacuole	Gene Ontology	GO:0005773
	plasma membrane	Gene Ontology	GO:0005886
	cytosolic large ribosomal subunit	Gene Ontology	GO:0022625
	cytosolic ribosome	Gene Ontology	GO:0022626
GOslim:	RNA binding	Gene Ontology Slim	GO:0003723
	structural constituent of ribosome	Gene Ontology Slim	GO:0003735
	structural molecule activity	Gene Ontology Slim	GO:0005198
	intracellular	Gene Ontology Slim	GO:0005622
	cytoplasm	Gene Ontology Slim	GO:0005737
	vacuole	Gene Ontology Slim	GO:0005773
	plasma membrane	Gene Ontology Slim	GO:0005886
	organelle	Gene Ontology Slim	GO:0043226
////
Query:	Gene.27213::c129626.graph_c0::g.27213::m.27213
Gene:	ath:AT3G13580
Entrez Gene ID:	820560
Pathway:	Ribosome	KEGG PATHWAY	ath03010
GO:	maturation of LSU-rRNA from tricistronic rRNA transcript (SSU-rRNA, 5.8S rRNA, LSU-rRNA)	Gene Ontology	GO:0000463
	RNA binding	Gene Ontology	GO:0003723
	mRNA binding	Gene Ontology	GO:0003729
	structural constituent of ribosome	Gene Ontology	GO:0003735
	cytoplasm	Gene Ontology	GO:0005737
	cytosol	Gene Ontology	GO:0005829
	cytosolic large ribosomal subunit	Gene Ontology	GO:0022625
	cytosolic ribosome	Gene Ontology	GO:0022626
GOslim:	RNA binding	Gene Ontology Slim	GO:0003723
	mRNA binding	Gene Ontology Slim	GO:0003729
	structural constituent of ribosome	Gene Ontology Slim	GO:0003735
	structural molecule activity	Gene Ontology Slim	GO:0005198
	intracellular	Gene Ontology Slim	GO:0005622
	cytoplasm	Gene Ontology Slim	GO:0005737
	cytosol	Gene Ontology Slim	GO:0005829
////
Query:	Gene.28581::c130472.graph_c0::g.28581::m.28581
Gene:	ath:AT1G15930
Entrez Gene ID:	838163
Pathway:	Ribosome	KEGG PATHWAY	ath03010
GO:	structural constituent of ribosome	Gene Ontology	GO:0003735
	nucleus	Gene Ontology	GO:0005634
	cytoplasm	Gene Ontology	GO:0005737
	cytosol	Gene Ontology	GO:0005829
	translation	Gene Ontology	GO:0006412
	cytosolic ribosome	Gene Ontology	GO:0022626
	cytosolic small ribosomal subunit	Gene Ontology	GO:0022627
	response to cadmium ion	Gene Ontology	GO:0046686
GOslim:	structural constituent of ribosome	Gene Ontology Slim	GO:0003735
	structural molecule activity	Gene Ontology Slim	GO:0005198
	intracellular	Gene Ontology Slim	GO:0005622
	nucleus	Gene Ontology Slim	GO:0005634
	cytoplasm	Gene Ontology Slim	GO:0005737
	cytosol	Gene Ontology Slim	GO:0005829
	translation	Gene Ontology Slim	GO:0006412
	biosynthetic process	Gene Ontology Slim	GO:0009058
	cellular nitrogen compound metabolic process	Gene Ontology Slim	GO:0034641
	organelle	Gene Ontology Slim	GO:0043226
////
Query:	Gene.31480::c132087.graph_c0::g.31480::m.31480
Gene:	ath:AT1G74050
Entrez Gene ID:	843744
Pathway:	Ribosome	KEGG PATHWAY	ath03010
GO:	ribosomal large subunit assembly	Gene Ontology	GO:0000027
	cytoplasmic translation	Gene Ontology	GO:0002181
	RNA binding	Gene Ontology	GO:0003723
	mRNA binding	Gene Ontology	GO:0003729
	structural constituent of ribosome	Gene Ontology	GO:0003735
	cytoplasm	Gene Ontology	GO:0005737
	mitochondrion	Gene Ontology	GO:0005739
	cytosol	Gene Ontology	GO:0005829
	plasma membrane	Gene Ontology	GO:0005886
	plasmodesma	Gene Ontology	GO:0009506
	cytosolic large ribosomal subunit	Gene Ontology	GO:0022625
GOslim:	RNA binding	Gene Ontology Slim	GO:0003723
	structural constituent of ribosome	Gene Ontology Slim	GO:0003735
	structural molecule activity	Gene Ontology Slim	GO:0005198
	intracellular	Gene Ontology Slim	GO:0005622
	cytoplasm	Gene Ontology Slim	GO:0005737
	mitochondrion	Gene Ontology Slim	GO:0005739
	cytosol	Gene Ontology Slim	GO:0005829
	plasma membrane	Gene Ontology Slim	GO:0005886
	organelle	Gene Ontology Slim	GO:0043226
////
Query:	Gene.32476::c132636.graph_c0::g.32476::m.32476
Gene:	ath:AT2G20450
Entrez Gene ID:	816564
Pathway:	Ribosome	KEGG PATHWAY	ath03010
GO:	RNA binding	Gene Ontology	GO:0003723
	mRNA binding	Gene Ontology	GO:0003729
	cytoplasm	Gene Ontology	GO:0005737
	mitochondrion	Gene Ontology	GO:0005739
	vacuole	Gene Ontology	GO:0005773
	endoplasmic reticulum	Gene Ontology	GO:0005783
	Golgi apparatus	Gene Ontology	GO:0005794
	translation	Gene Ontology	GO:0006412
	plasmodesma	Gene Ontology	GO:0009506
	cytosolic large ribosomal subunit	Gene Ontology	GO:0022625
	ribosomal large subunit biogenesis	Gene Ontology	GO:0042273
GOslim:	RNA binding	Gene Ontology Slim	GO:0003723
	intracellular	Gene Ontology Slim	GO:0005622
	cytoplasm	Gene Ontology Slim	GO:0005737
	mitochondrion	Gene Ontology Slim	GO:0005739
	vacuole	Gene Ontology Slim	GO:0005773
	endoplasmic reticulum	Gene Ontology Slim	GO:0005783
	translation	Gene Ontology Slim	GO:0006412
	biosynthetic process	Gene Ontology Slim	GO:0009058
	cellular nitrogen compound metabolic process	Gene Ontology Slim	GO:0034641
	organelle	Gene Ontology Slim	GO:0043226
////
Query:	Gene.33156::c132975.graph_c0::g.33156::m.33156
Gene:	ath:AT2G44065
Entrez Gene ID:	819012
GO:	RNA binding	Gene Ontology	GO:0003723
	structural constituent of ribosome	Gene Ontology	GO:0003735
	mitochondrial large ribosomal subunit	Gene Ontology	GO:0005762
	chloroplast	Gene Ontology	GO:0009507
	mitochondrial translation	Gene Ontology	GO:0032543
GOslim:	structural constituent of ribosome	Gene Ontology Slim	GO:0003735
	structural molecule activity	Gene Ontology Slim	GO:0005198
////
Query:	Gene.33578::c133209.graph_c0::g.33578::m.33578
Gene:	ath:AT1G52300
Entrez Gene ID:	841660
Pathway:	Ribosome	KEGG PATHWAY	ath03010
GO:	RNA binding	Gene Ontology	GO:0003723
	mRNA binding	Gene Ontology	GO:0003729
	structural constituent of ribosome	Gene Ontology	GO:0003735
	nucleus	Gene Ontology	GO:0005634
	cytoplasm	Gene Ontology	GO:0005737
	translation	Gene Ontology	GO:0006412
	cytosolic large ribosomal subunit	Gene Ontology	GO:0022625
	cytosolic ribosome	Gene Ontology	GO:0022626
GOslim:	RNA binding	Gene Ontology Slim	GO:0003723
	structural constituent of ribosome	Gene Ontology Slim	GO:0003735
	structural molecule activity	Gene Ontology Slim	GO:0005198
	intracellular	Gene Ontology Slim	GO:0005622
	nucleus	Gene Ontology Slim	GO:0005634
	cytoplasm	Gene Ontology Slim	GO:0005737
	translation	Gene Ontology Slim	GO:0006412
	biosynthetic process	Gene Ontology Slim	GO:0009058
	rRNA binding	Gene Ontology Slim	GO:0019843
	cellular nitrogen compound metabolic process	Gene Ontology Slim	GO:0034641
	organelle	Gene Ontology Slim	GO:0043226
////
Query:	Gene.34235::c133529.graph_c0::g.34235::m.34235
Gene:	ath:AT3G62870
Entrez Gene ID:	825462
Pathway:	Ribosome	KEGG PATHWAY	ath03010
GO:	maturation of LSU-rRNA	Gene Ontology	GO:0000470
	RNA binding	Gene Ontology	GO:0003723
	mRNA binding	Gene Ontology	GO:0003729
	cytoplasm	Gene Ontology	GO:0005737
	vacuolar membrane	Gene Ontology	GO:0005774
	Golgi apparatus	Gene Ontology	GO:0005794
	cytosol	Gene Ontology	GO:0005829
	cytosolic large ribosomal subunit	Gene Ontology	GO:0022625
	cytosolic ribosome	Gene Ontology	GO:0022626
GOslim:	RNA binding	Gene Ontology Slim	GO:0003723
	intracellular	Gene Ontology Slim	GO:0005622
	cytoplasm	Gene Ontology Slim	GO:0005737
	cytosol	Gene Ontology Slim	GO:0005829
////
Query:	Gene.35093::c133930.graph_c0::g.35093::m.35093
Gene:	ath:AT5G62300
Entrez Gene ID:	836351
Pathway:	Ribosome	KEGG PATHWAY	ath03010
GO:	mRNA binding	Gene Ontology	GO:0003729
	cell wall	Gene Ontology	GO:0005618
	Golgi apparatus	Gene Ontology	GO:0005794
	cytosol	Gene Ontology	GO:0005829
	translation	Gene Ontology	GO:0006412
	chloroplast	Gene Ontology	GO:0009507
	plastid	Gene Ontology	GO:0009536
	cytosolic small ribosomal subunit	Gene Ontology	GO:0022627
GOslim:	RNA binding	Gene Ontology Slim	GO:0003723
	mRNA binding	Gene Ontology Slim	GO:0003729
	structural constituent of ribosome	Gene Ontology Slim	GO:0003735
	structural molecule activity	Gene Ontology Slim	GO:0005198
	cell wall	Gene Ontology Slim	GO:0005618
	intracellular	Gene Ontology Slim	GO:0005622
	cytoplasm	Gene Ontology Slim	GO:0005737
	cytosol	Gene Ontology Slim	GO:0005829
	translation	Gene Ontology Slim	GO:0006412
	biosynthetic process	Gene Ontology Slim	GO:0009058
	plastid	Gene Ontology Slim	GO:0009536
	external encapsulating structure	Gene Ontology Slim	GO:0030312
	cellular nitrogen compound metabolic process	Gene Ontology Slim	GO:0034641
	organelle	Gene Ontology Slim	GO:0043226
////
Query:	Gene.36065::c134395.graph_c0::g.36065::m.36065
Gene:	ath:AT5G58420
Entrez Gene ID:	835955
Pathway:	Ribosome	KEGG PATHWAY	ath03010
GO:	RNA binding	Gene Ontology	GO:0003723
	structural constituent of ribosome	Gene Ontology	GO:0003735
	nucleolus	Gene Ontology	GO:0005730
	cytoplasm	Gene Ontology	GO:0005737
	Golgi apparatus	Gene Ontology	GO:0005794
	cytosol	Gene Ontology	GO:0005829
	translation	Gene Ontology	GO:0006412
	plastid	Gene Ontology	GO:0009536
	cytosolic ribosome	Gene Ontology	GO:0022626
	cytosolic small ribosomal subunit	Gene Ontology	GO:0022627
GOslim:	RNA binding	Gene Ontology Slim	GO:0003723
	structural constituent of ribosome	Gene Ontology Slim	GO:0003735
	structural molecule activity	Gene Ontology Slim	GO:0005198
	intracellular	Gene Ontology Slim	GO:0005622
	nucleus	Gene Ontology Slim	GO:0005634
	nucleolus	Gene Ontology Slim	GO:0005730
	cytoplasm	Gene Ontology Slim	GO:0005737
	cytosol	Gene Ontology Slim	GO:0005829
	translation	Gene Ontology Slim	GO:0006412
	biosynthetic process	Gene Ontology Slim	GO:0009058
	plastid	Gene Ontology Slim	GO:0009536
	rRNA binding	Gene Ontology Slim	GO:0019843
	cellular nitrogen compound metabolic process	Gene Ontology Slim	GO:0034641
	organelle	Gene Ontology Slim	GO:0043226
////
Query:	Gene.36183::c134453.graph_c0::g.36183::m.36183
Gene:	ath:AT3G49010	BBC1
Entrez Gene ID:	824062
Pathway:	Ribosome	KEGG PATHWAY	ath03010
GO:	RNA binding	Gene Ontology	GO:0003723
	mRNA binding	Gene Ontology	GO:0003729
	structural constituent of ribosome	Gene Ontology	GO:0003735
	cell wall	Gene Ontology	GO:0005618
	nucleolus	Gene Ontology	GO:0005730
	cytoplasm	Gene Ontology	GO:0005737
	vacuolar membrane	Gene Ontology	GO:0005774
	Golgi apparatus	Gene Ontology	GO:0005794
	cytosol	Gene Ontology	GO:0005829
	ribosome	Gene Ontology	GO:0005840
	plasma membrane	Gene Ontology	GO:0005886
	translation	Gene Ontology	GO:0006412
	plasmodesma	Gene Ontology	GO:0009506
	cytosolic large ribosomal subunit	Gene Ontology	GO:0022625
	cytosolic ribosome	Gene Ontology	GO:0022626
GOslim:	RNA binding	Gene Ontology Slim	GO:0003723
	mRNA binding	Gene Ontology Slim	GO:0003729
	structural constituent of ribosome	Gene Ontology Slim	GO:0003735
	structural molecule activity	Gene Ontology Slim	GO:0005198
	cell wall	Gene Ontology Slim	GO:0005618
	intracellular	Gene Ontology Slim	GO:0005622
	nucleus	Gene Ontology Slim	GO:0005634
	nucleolus	Gene Ontology Slim	GO:0005730
	cytoplasm	Gene Ontology Slim	GO:0005737
	cytosol	Gene Ontology Slim	GO:0005829
	ribosome	Gene Ontology Slim	GO:0005840
	plasma membrane	Gene Ontology Slim	GO:0005886
	translation	Gene Ontology Slim	GO:0006412
	biosynthetic process	Gene Ontology Slim	GO:0009058
	external encapsulating structure	Gene Ontology Slim	GO:0030312
	cellular nitrogen compound metabolic process	Gene Ontology Slim	GO:0034641
	organelle	Gene Ontology Slim	GO:0043226
////
Query:	Gene.46723::c138803.graph_c0::g.46723::m.46723
Gene:	ath:AT5G56670
Entrez Gene ID:	835768
Pathway:	Ribosome	KEGG PATHWAY	ath03010
GO:	mRNA binding	Gene Ontology	GO:0003729
	cytoplasm	Gene Ontology	GO:0005737
	translation	Gene Ontology	GO:0006412
	plastid	Gene Ontology	GO:0009536
	cytosolic small ribosomal subunit	Gene Ontology	GO:0022627
GOslim:	structural constituent of ribosome	Gene Ontology Slim	GO:0003735
	structural molecule activity	Gene Ontology Slim	GO:0005198
	intracellular	Gene Ontology Slim	GO:0005622
	nucleus	Gene Ontology Slim	GO:0005634
	nucleolus	Gene Ontology Slim	GO:0005730
	cytoplasm	Gene Ontology Slim	GO:0005737
	mitochondrion	Gene Ontology Slim	GO:0005739
	plasma membrane	Gene Ontology Slim	GO:0005886
	translation	Gene Ontology Slim	GO:0006412
	biosynthetic process	Gene Ontology Slim	GO:0009058
	plastid	Gene Ontology Slim	GO:0009536
	cellular nitrogen compound metabolic process	Gene Ontology Slim	GO:0034641
	organelle	Gene Ontology Slim	GO:0043226
////
Query:	Gene.47176::c138980.graph_c0::g.47176::m.47176
Gene:	ath:AT1G59359
Entrez Gene ID:	842237
Pathway:	Ribosome	KEGG PATHWAY	ath03010
GO:	mRNA binding	Gene Ontology	GO:0003729
	structural constituent of ribosome	Gene Ontology	GO:0003735
	cell wall	Gene Ontology	GO:0005618
	nucleus	Gene Ontology	GO:0005634
	Golgi apparatus	Gene Ontology	GO:0005794
	translation	Gene Ontology	GO:0006412
	plasmodesma	Gene Ontology	GO:0009506
	cytosolic small ribosomal subunit	Gene Ontology	GO:0022627
GOslim:	RNA binding	Gene Ontology Slim	GO:0003723
	mRNA binding	Gene Ontology Slim	GO:0003729
	structural constituent of ribosome	Gene Ontology Slim	GO:0003735
	structural molecule activity	Gene Ontology Slim	GO:0005198
	cell wall	Gene Ontology Slim	GO:0005618
	intracellular	Gene Ontology Slim	GO:0005622
	nucleus	Gene Ontology Slim	GO:0005634
	translation	Gene Ontology Slim	GO:0006412
	biosynthetic process	Gene Ontology Slim	GO:0009058
	external encapsulating structure	Gene Ontology Slim	GO:0030312
	cellular nitrogen compound metabolic process	Gene Ontology Slim	GO:0034641
	organelle	Gene Ontology Slim	GO:0043226
////
Query:	Gene.51855::c140575.graph_c0::g.51855::m.51855
Gene:	ath:AT3G44590
Entrez Gene ID:	823584
Pathway:	Ribosome	KEGG PATHWAY	ath03010
GO:	nucleus	Gene Ontology	GO:0005634
	cytosol	Gene Ontology	GO:0005829
	translational elongation	Gene Ontology	GO:0006414
	cytosolic ribosome	Gene Ontology	GO:0022626
	secretory vesicle	Gene Ontology	GO:0099503
GOslim:	intracellular	Gene Ontology Slim	GO:0005622
	nucleus	Gene Ontology Slim	GO:0005634
	cytoplasm	Gene Ontology Slim	GO:0005737
	cytosol	Gene Ontology Slim	GO:0005829
	organelle	Gene Ontology Slim	GO:0043226
////
Query:	Gene.66754::c144781.graph_c0::g.66754::m.66754
Gene:	ath:AT3G09630
Entrez Gene ID:	820120
Pathway:	Ribosome	KEGG PATHWAY	ath03010
GOslim:	RNA binding	Gene Ontology Slim	GO:0003723
	mRNA binding	Gene Ontology Slim	GO:0003729
	cell wall	Gene Ontology Slim	GO:0005618
	intracellular	Gene Ontology Slim	GO:0005622
	nucleus	Gene Ontology Slim	GO:0005634
	nucleolus	Gene Ontology Slim	GO:0005730
	cytoplasm	Gene Ontology Slim	GO:0005737
	vacuole	Gene Ontology Slim	GO:0005773
	cytosol	Gene Ontology Slim	GO:0005829
	plasma membrane	Gene Ontology Slim	GO:0005886
	translation	Gene Ontology Slim	GO:0006412
	biosynthetic process	Gene Ontology Slim	GO:0009058
	external encapsulating structure	Gene Ontology Slim	GO:0030312
	cellular nitrogen compound metabolic process	Gene Ontology Slim	GO:0034641
	organelle	Gene Ontology Slim	GO:0043226
////
Query:	Gene.89258::c149583.graph_c0::g.89258::m.89258
Gene:	ath:AT3G55280	RPL23AB
Entrez Gene ID:	824694
Pathway:	Ribosome	KEGG PATHWAY	ath03010
GO:	ribosomal large subunit assembly	Gene Ontology	GO:0000027
	mRNA binding	Gene Ontology	GO:0003729
	structural constituent of ribosome	Gene Ontology	GO:0003735
	cytoplasm	Gene Ontology	GO:0005737
	Golgi apparatus	Gene Ontology	GO:0005794
	cytosol	Gene Ontology	GO:0005829
	translation	Gene Ontology	GO:0006412
	response to oxidative stress	Gene Ontology	GO:0006979
	response to cold	Gene Ontology	GO:0009409
	response to high light intensity	Gene Ontology	GO:0009644
	cytosolic large ribosomal subunit	Gene Ontology	GO:0022625
	cytosolic ribosome	Gene Ontology	GO:0022626
GOslim:	RNA binding	Gene Ontology Slim	GO:0003723
	intracellular	Gene Ontology Slim	GO:0005622
	cytoplasm	Gene Ontology Slim	GO:0005737
	cytosol	Gene Ontology Slim	GO:0005829
	translation	Gene Ontology Slim	GO:0006412
	biosynthetic process	Gene Ontology Slim	GO:0009058
	rRNA binding	Gene Ontology Slim	GO:0019843
	cellular nitrogen compound metabolic process	Gene Ontology Slim	GO:0034641
////
Query:	Gene.91620::c150031.graph_c0::g.91620::m.91620
Gene:	ath:AT1G72370	P40
Entrez Gene ID:	843569
Pathway:	Ribosome	KEGG PATHWAY	ath03010
GO:	ribosomal small subunit assembly	Gene Ontology	GO:0000028
	cytoplasmic translation	Gene Ontology	GO:0002181
	mRNA binding	Gene Ontology	GO:0003729
	structural constituent of ribosome	Gene Ontology	GO:0003735
	nucleus	Gene Ontology	GO:0005634
	cytoplasm	Gene Ontology	GO:0005737
	Golgi apparatus	Gene Ontology	GO:0005794
	cytosol	Gene Ontology	GO:0005829
	plasma membrane	Gene Ontology	GO:0005886
	translation	Gene Ontology	GO:0006412
	response to osmotic stress	Gene Ontology	GO:0006970
	plasmodesma	Gene Ontology	GO:0009506
	chloroplast	Gene Ontology	GO:0009507
	response to salt stress	Gene Ontology	GO:0009651
	small ribosomal subunit	Gene Ontology	GO:0015935
	cytosolic ribosome	Gene Ontology	GO:0022626
	cytosolic small ribosomal subunit	Gene Ontology	GO:0022627
	mature ribosome assembly	Gene Ontology	GO:0042256
GOslim:	RNA binding	Gene Ontology Slim	GO:0003723
	mRNA binding	Gene Ontology Slim	GO:0003729
	intracellular	Gene Ontology Slim	GO:0005622
	nucleus	Gene Ontology Slim	GO:0005634
	cytoplasm	Gene Ontology Slim	GO:0005737
	cytosol	Gene Ontology Slim	GO:0005829
	plasma membrane	Gene Ontology Slim	GO:0005886
	organelle	Gene Ontology Slim	GO:0043226
////
Query:	Gene.138352::c157378.graph_c0::g.138352::m.138352
Gene:	ath:AT1G70600
Entrez Gene ID:	843397
Pathway:	Ribosome	KEGG PATHWAY	ath03010
GO:	mRNA binding	Gene Ontology	GO:0003729
	structural constituent of ribosome	Gene Ontology	GO:0003735
	cytoplasm	Gene Ontology	GO:0005737
	mitochondrion	Gene Ontology	GO:0005739
	cytosol	Gene Ontology	GO:0005829
	translation	Gene Ontology	GO:0006412
	plasmodesma	Gene Ontology	GO:0009506
	cytosolic large ribosomal subunit	Gene Ontology	GO:0022625
	cytosolic ribosome	Gene Ontology	GO:0022626
GOslim:	structural constituent of ribosome	Gene Ontology Slim	GO:0003735
	structural molecule activity	Gene Ontology Slim	GO:0005198
	intracellular	Gene Ontology Slim	GO:0005622
	cytoplasm	Gene Ontology Slim	GO:0005737
	mitochondrion	Gene Ontology Slim	GO:0005739
	cytosol	Gene Ontology Slim	GO:0005829
	translation	Gene Ontology Slim	GO:0006412
	biosynthetic process	Gene Ontology Slim	GO:0009058
	cellular nitrogen compound metabolic process	Gene Ontology Slim	GO:0034641
	organelle	Gene Ontology Slim	GO:0043226
////
Query:	Gene.155010::c33370.graph_c0::g.155010::m.155010
Gene:	ath:AT2G09990
Entrez Gene ID:	815456
Pathway:	Ribosome	KEGG PATHWAY	ath03010
GO:	maturation of SSU-rRNA from tricistronic rRNA transcript (SSU-rRNA, 5.8S rRNA, LSU-rRNA)	Gene Ontology	GO:0000462
	RNA binding	Gene Ontology	GO:0003723
	mRNA binding	Gene Ontology	GO:0003729
	structural constituent of ribosome	Gene Ontology	GO:0003735
	cell wall	Gene Ontology	GO:0005618
	cytoplasm	Gene Ontology	GO:0005737
	mitochondrion	Gene Ontology	GO:0005739
	Golgi apparatus	Gene Ontology	GO:0005794
	cytosol	Gene Ontology	GO:0005829
	translation	Gene Ontology	GO:0006412
	plasmodesma	Gene Ontology	GO:0009506
	chloroplast	Gene Ontology	GO:0009507
	small ribosomal subunit	Gene Ontology	GO:0015935
	cytosolic ribosome	Gene Ontology	GO:0022626
	cytosolic small ribosomal subunit	Gene Ontology	GO:0022627
GOslim:	RNA binding	Gene Ontology Slim	GO:0003723
	structural constituent of ribosome	Gene Ontology Slim	GO:0003735
	structural molecule activity	Gene Ontology Slim	GO:0005198
	cell wall	Gene Ontology Slim	GO:0005618
	intracellular	Gene Ontology Slim	GO:0005622
	cytoplasm	Gene Ontology Slim	GO:0005737
	mitochondrion	Gene Ontology Slim	GO:0005739
	cytosol	Gene Ontology Slim	GO:0005829
	translation	Gene Ontology Slim	GO:0006412
	biosynthetic process	Gene Ontology Slim	GO:0009058
	external encapsulating structure	Gene Ontology Slim	GO:0030312
	cellular nitrogen compound metabolic process	Gene Ontology Slim	GO:0034641
	organelle	Gene Ontology Slim	GO:0043226
////
Query:	Gene.159025::c53288.graph_c0::g.159025::m.159025
Gene:	ath:AT3G53020	STV1
Entrez Gene ID:	824468
Pathway:	Ribosome	KEGG PATHWAY	ath03010
GO:	ribosomal large subunit assembly	Gene Ontology	GO:0000027
	RNA binding	Gene Ontology	GO:0003723
	mRNA binding	Gene Ontology	GO:0003729
	structural constituent of ribosome	Gene Ontology	GO:0003735
	protein binding	Gene Ontology	GO:0005515
	nucleolus	Gene Ontology	GO:0005730
	cytoplasm	Gene Ontology	GO:0005737
	mitochondrion	Gene Ontology	GO:0005739
	cytosol	Gene Ontology	GO:0005829
	ribosome	Gene Ontology	GO:0005840
	translation	Gene Ontology	GO:0006412
	chloroplast	Gene Ontology	GO:0009507
	plastid	Gene Ontology	GO:0009536
	chloroplast stroma	Gene Ontology	GO:0009570
	auxin-activated signaling pathway	Gene Ontology	GO:0009734
	chloroplast envelope	Gene Ontology	GO:0009941
	adaxial/abaxial pattern specification	Gene Ontology	GO:0009955
	leaf morphogenesis	Gene Ontology	GO:0009965
	cytosolic large ribosomal subunit	Gene Ontology	GO:0022625
	plastid translation	Gene Ontology	GO:0032544
	gynoecium development	Gene Ontology	GO:0048467
	assembly of large subunit precursor of preribosome	Gene Ontology	GO:1902626
GOslim:	RNA binding	Gene Ontology Slim	GO:0003723
	mRNA binding	Gene Ontology Slim	GO:0003729
	structural constituent of ribosome	Gene Ontology Slim	GO:0003735
	structural molecule activity	Gene Ontology Slim	GO:0005198
	intracellular	Gene Ontology Slim	GO:0005622
	nucleus	Gene Ontology Slim	GO:0005634
	nucleolus	Gene Ontology Slim	GO:0005730
	cytoplasm	Gene Ontology Slim	GO:0005737
	cytosol	Gene Ontology Slim	GO:0005829
	translation	Gene Ontology Slim	GO:0006412
	biosynthetic process	Gene Ontology Slim	GO:0009058
	cellular nitrogen compound metabolic process	Gene Ontology Slim	GO:0034641
	organelle	Gene Ontology Slim	GO:0043226
////
Query:	Gene.164230::c72316.graph_c0::g.164230::m.164230
Gene:	ath:AT5G02610
Entrez Gene ID:	831853
Pathway:	Ribosome	KEGG PATHWAY	ath03010
GO:	mRNA binding	Gene Ontology	GO:0003729
	structural constituent of ribosome	Gene Ontology	GO:0003735
	cytoplasm	Gene Ontology	GO:0005737
	vacuolar membrane	Gene Ontology	GO:0005774
	Golgi apparatus	Gene Ontology	GO:0005794
	plasma membrane	Gene Ontology	GO:0005886
	translation	Gene Ontology	GO:0006412
	plasmodesma	Gene Ontology	GO:0009506
	cytosolic large ribosomal subunit	Gene Ontology	GO:0022625
	cytosolic ribosome	Gene Ontology	GO:0022626
////
Query:	Gene.165649::c79423.graph_c0::g.165649::m.165649
Gene:	ath:AT1G48830
Entrez Gene ID:	841305
Pathway:	Ribosome	KEGG PATHWAY	ath03010
GO:	mRNA binding	Gene Ontology	GO:0003729
	cell wall	Gene Ontology	GO:0005618
	nucleus	Gene Ontology	GO:0005634
	cytosol	Gene Ontology	GO:0005829
	plasma membrane	Gene Ontology	GO:0005886
	rRNA processing	Gene Ontology	GO:0006364
	translation	Gene Ontology	GO:0006412
	cytosolic ribosome	Gene Ontology	GO:0022626
	cytosolic small ribosomal subunit	Gene Ontology	GO:0022627
	small-subunit processome	Gene Ontology	GO:0032040
	ribosomal small subunit biogenesis	Gene Ontology	GO:0042274
GOslim:	RNA binding	Gene Ontology Slim	GO:0003723
	mRNA binding	Gene Ontology Slim	GO:0003729
	cell wall	Gene Ontology Slim	GO:0005618
	intracellular	Gene Ontology Slim	GO:0005622
	nucleus	Gene Ontology Slim	GO:0005634
	cytoplasm	Gene Ontology Slim	GO:0005737
	cytosol	Gene Ontology Slim	GO:0005829
	plasma membrane	Gene Ontology Slim	GO:0005886
	translation	Gene Ontology Slim	GO:0006412
	biosynthetic process	Gene Ontology Slim	GO:0009058
	external encapsulating structure	Gene Ontology Slim	GO:0030312
	cellular nitrogen compound metabolic process	Gene Ontology Slim	GO:0034641
	organelle	Gene Ontology Slim	GO:0043226
////
Query:	Gene.168262::c86139.graph_c0::g.168262::m.168262
Gene:	ath:AT2G47110	UBQ6
Entrez Gene ID:	819323
Pathway:	Ribosome	KEGG PATHWAY	ath03010
GO:	mRNA binding	Gene Ontology	GO:0003729
	intracellular anatomical structure	Gene Ontology	GO:0005622
	nucleus	Gene Ontology	GO:0005634
	cytoplasm	Gene Ontology	GO:0005737
	Golgi apparatus	Gene Ontology	GO:0005794
	cytosol	Gene Ontology	GO:0005829
	translation	Gene Ontology	GO:0006412
	ubiquitin-dependent protein catabolic process	Gene Ontology	GO:0006511
	protein ubiquitination	Gene Ontology	GO:0016567
	modification-dependent protein catabolic process	Gene Ontology	GO:0019941
	cytosolic small ribosomal subunit	Gene Ontology	GO:0022627
	protein tag	Gene Ontology	GO:0031386
	ubiquitin protein ligase binding	Gene Ontology	GO:0031625
GOslim:	intracellular	Gene Ontology Slim	GO:0005622
	nucleus	Gene Ontology Slim	GO:0005634
	cytoplasm	Gene Ontology Slim	GO:0005737
	Golgi apparatus	Gene Ontology Slim	GO:0005794
	cytosol	Gene Ontology Slim	GO:0005829
	translation	Gene Ontology Slim	GO:0006412
	biosynthetic process	Gene Ontology Slim	GO:0009058
	cellular nitrogen compound metabolic process	Gene Ontology Slim	GO:0034641
	organelle	Gene Ontology Slim	GO:0043226
////
Query:	Gene.169448::c88147.graph_c0::g.169448::m.169448
Gene:	ath:AT4G14320
Entrez Gene ID:	827074
Pathway:	Ribosome	KEGG PATHWAY	ath03010
GO:	structural constituent of ribosome	Gene Ontology	GO:0003735
	cytoplasm	Gene Ontology	GO:0005737
	cytosol	Gene Ontology	GO:0005829
	translation	Gene Ontology	GO:0006412
	cytosolic large ribosomal subunit	Gene Ontology	GO:0022625
GOslim:	intracellular	Gene Ontology Slim	GO:0005622
	cytoplasm	Gene Ontology Slim	GO:0005737
	cytosol	Gene Ontology Slim	GO:0005829
////
Query:	Gene.169786::c88377.graph_c0::g.169786::m.169786
Gene:	ath:AT4G35490	MRPL11
Entrez Gene ID:	829701
Pathway:	Ribosome	KEGG PATHWAY	ath03010
GO:	ribosomal large subunit assembly	Gene Ontology	GO:0000027
	structural constituent of ribosome	Gene Ontology	GO:0003735
	mitochondrion	Gene Ontology	GO:0005739
	ribosome	Gene Ontology	GO:0005840
	translation	Gene Ontology	GO:0006412
	large ribosomal subunit	Gene Ontology	GO:0015934
	rRNA binding	Gene Ontology	GO:0019843
	large ribosomal subunit rRNA binding	Gene Ontology	GO:0070180
GOslim:	RNA binding	Gene Ontology Slim	GO:0003723
	structural constituent of ribosome	Gene Ontology Slim	GO:0003735
	structural molecule activity	Gene Ontology Slim	GO:0005198
	intracellular	Gene Ontology Slim	GO:0005622
	cytoplasm	Gene Ontology Slim	GO:0005737
	mitochondrion	Gene Ontology Slim	GO:0005739
	translation	Gene Ontology Slim	GO:0006412
	biosynthetic process	Gene Ontology Slim	GO:0009058
	rRNA binding	Gene Ontology Slim	GO:0019843
	cellular nitrogen compound metabolic process	Gene Ontology Slim	GO:0034641
	organelle	Gene Ontology Slim	GO:0043226
////
Query:	Gene.171368::c89420.graph_c0::g.171368::m.171368
Gene:	ath:AT5G02960
Entrez Gene ID:	831724
Pathway:	Ribosome	KEGG PATHWAY	ath03010
GO:	mRNA binding	Gene Ontology	GO:0003729
	structural constituent of ribosome	Gene Ontology	GO:0003735
	cytoplasm	Gene Ontology	GO:0005737
	Golgi apparatus	Gene Ontology	GO:0005794
	ribosome	Gene Ontology	GO:0005840
	plasma membrane	Gene Ontology	GO:0005886
	translation	Gene Ontology	GO:0006412
	cytosolic ribosome	Gene Ontology	GO:0022626
	cytosolic small ribosomal subunit	Gene Ontology	GO:0022627
GOslim:	structural constituent of ribosome	Gene Ontology Slim	GO:0003735
	structural molecule activity	Gene Ontology Slim	GO:0005198
	intracellular	Gene Ontology Slim	GO:0005622
	cytoplasm	Gene Ontology Slim	GO:0005737
	plasma membrane	Gene Ontology Slim	GO:0005886
	translation	Gene Ontology Slim	GO:0006412
	biosynthetic process	Gene Ontology Slim	GO:0009058
	cellular nitrogen compound metabolic process	Gene Ontology Slim	GO:0034641
////
Query:	Gene.172331::c90074.graph_c0::g.172331::m.172331
Gene:	ath:AT1G52300
Entrez Gene ID:	841660
Pathway:	Ribosome	KEGG PATHWAY	ath03010
GO:	RNA binding	Gene Ontology	GO:0003723
	mRNA binding	Gene Ontology	GO:0003729
	structural constituent of ribosome	Gene Ontology	GO:0003735
	nucleus	Gene Ontology	GO:0005634
	cytoplasm	Gene Ontology	GO:0005737
	translation	Gene Ontology	GO:0006412
	cytosolic large ribosomal subunit	Gene Ontology	GO:0022625
	cytosolic ribosome	Gene Ontology	GO:0022626
GOslim:	RNA binding	Gene Ontology Slim	GO:0003723
	structural constituent of ribosome	Gene Ontology Slim	GO:0003735
	structural molecule activity	Gene Ontology Slim	GO:0005198
	intracellular	Gene Ontology Slim	GO:0005622
	nucleus	Gene Ontology Slim	GO:0005634
	cytoplasm	Gene Ontology Slim	GO:0005737
	translation	Gene Ontology Slim	GO:0006412
	biosynthetic process	Gene Ontology Slim	GO:0009058
	rRNA binding	Gene Ontology Slim	GO:0019843
	cellular nitrogen compound metabolic process	Gene Ontology Slim	GO:0034641
	organelle	Gene Ontology Slim	GO:0043226
////
Query:	Gene.37347::c134987.graph_c0::g.37347::m.37347
Gene:	ath:AT3G53740
Entrez Gene ID:	824541
Pathway:	Ribosome	KEGG PATHWAY	ath03010
GO:	cytoplasmic translation	Gene Ontology	GO:0002181
	structural constituent of ribosome	Gene Ontology	GO:0003735
	cytoplasm	Gene Ontology	GO:0005737
	vacuolar membrane	Gene Ontology	GO:0005774
	cytosol	Gene Ontology	GO:0005829
	cytosolic large ribosomal subunit	Gene Ontology	GO:0022625
	cytosolic ribosome	Gene Ontology	GO:0022626
GOslim:	structural constituent of ribosome	Gene Ontology Slim	GO:0003735
	structural molecule activity	Gene Ontology Slim	GO:0005198
	intracellular	Gene Ontology Slim	GO:0005622
	cytoplasm	Gene Ontology Slim	GO:0005737
	cytosol	Gene Ontology Slim	GO:0005829
////
Query:	Gene.84455::c148667.graph_c0::g.84455::m.84455
Gene:	ath:AT2G31610
Entrez Gene ID:	817719
Pathway:	Ribosome	KEGG PATHWAY	ath03010
GO:	mRNA binding	Gene Ontology	GO:0003729
	structural constituent of ribosome	Gene Ontology	GO:0003735
	nucleus	Gene Ontology	GO:0005634
	vacuole	Gene Ontology	GO:0005773
	vacuolar membrane	Gene Ontology	GO:0005774
	peroxisome	Gene Ontology	GO:0005777
	Golgi apparatus	Gene Ontology	GO:0005794
	cytosol	Gene Ontology	GO:0005829
	translation	Gene Ontology	GO:0006412
	plasmodesma	Gene Ontology	GO:0009506
	chloroplast	Gene Ontology	GO:0009507
	cytosolic ribosome	Gene Ontology	GO:0022626
	cytosolic small ribosomal subunit	Gene Ontology	GO:0022627
GOslim:	RNA binding	Gene Ontology Slim	GO:0003723
	mRNA binding	Gene Ontology Slim	GO:0003729
	structural constituent of ribosome	Gene Ontology Slim	GO:0003735
	structural molecule activity	Gene Ontology Slim	GO:0005198
	intracellular	Gene Ontology Slim	GO:0005622
	nucleus	Gene Ontology Slim	GO:0005634
	cytoplasm	Gene Ontology Slim	GO:0005737
	vacuole	Gene Ontology Slim	GO:0005773
	peroxisome	Gene Ontology Slim	GO:0005777
	cytosol	Gene Ontology Slim	GO:0005829
	translation	Gene Ontology Slim	GO:0006412
	biosynthetic process	Gene Ontology Slim	GO:0009058
	cellular nitrogen compound metabolic process	Gene Ontology Slim	GO:0034641
	organelle	Gene Ontology Slim	GO:0043226
////
Query:	Gene.94187::c150494.graph_c0::g.94187::m.94187
Gene:	ath:AT2G42710
Entrez Gene ID:	818871
GO:	maturation of LSU-rRNA	Gene Ontology	GO:0000470
	RNA binding	Gene Ontology	GO:0003723
	mRNA binding	Gene Ontology	GO:0003729
	structural constituent of ribosome	Gene Ontology	GO:0003735
	cytosol	Gene Ontology	GO:0005829
	translation	Gene Ontology	GO:0006412
	chloroplast	Gene Ontology	GO:0009507
	cytosolic large ribosomal subunit	Gene Ontology	GO:0022625
GOslim:	RNA binding	Gene Ontology Slim	GO:0003723
	structural constituent of ribosome	Gene Ontology Slim	GO:0003735
	structural molecule activity	Gene Ontology Slim	GO:0005198
	intracellular	Gene Ontology Slim	GO:0005622
	cytoplasm	Gene Ontology Slim	GO:0005737
	cytosol	Gene Ontology Slim	GO:0005829
	translation	Gene Ontology Slim	GO:0006412
	biosynthetic process	Gene Ontology Slim	GO:0009058
	cellular nitrogen compound metabolic process	Gene Ontology Slim	GO:0034641
////
Query:	Gene.12040::c117625.graph_c0::g.12040::m.12040
Gene:	ath:AT5G35530
Entrez Gene ID:	833518
Pathway:	Ribosome	KEGG PATHWAY	ath03010
GO:	mRNA binding	Gene Ontology	GO:0003729
	structural constituent of ribosome	Gene Ontology	GO:0003735
	nucleus	Gene Ontology	GO:0005634
	nucleolus	Gene Ontology	GO:0005730
	Golgi apparatus	Gene Ontology	GO:0005794
	cytosol	Gene Ontology	GO:0005829
	translation	Gene Ontology	GO:0006412
	plasmodesma	Gene Ontology	GO:0009506
	plastid	Gene Ontology	GO:0009536
	cytosolic ribosome	Gene Ontology	GO:0022626
	cytosolic small ribosomal subunit	Gene Ontology	GO:0022627
GOslim:	RNA binding	Gene Ontology Slim	GO:0003723
	structural constituent of ribosome	Gene Ontology Slim	GO:0003735
	structural molecule activity	Gene Ontology Slim	GO:0005198
	intracellular	Gene Ontology Slim	GO:0005622
	nucleus	Gene Ontology Slim	GO:0005634
	nucleolus	Gene Ontology Slim	GO:0005730
	cytoplasm	Gene Ontology Slim	GO:0005737
	cytosol	Gene Ontology Slim	GO:0005829
	translation	Gene Ontology Slim	GO:0006412
	biosynthetic process	Gene Ontology Slim	GO:0009058
	plastid	Gene Ontology Slim	GO:0009536
	cellular nitrogen compound metabolic process	Gene Ontology Slim	GO:0034641
	organelle	Gene Ontology Slim	GO:0043226
////
Query:	Gene.15213::c120834.graph_c0::g.15213::m.15213
Gene:	ath:AT5G02450
Entrez Gene ID:	831907
Pathway:	Ribosome	KEGG PATHWAY	ath03010
GO:	cytoplasmic translation	Gene Ontology	GO:0002181
	mRNA binding	Gene Ontology	GO:0003729
	structural constituent of ribosome	Gene Ontology	GO:0003735
	cytoplasm	Gene Ontology	GO:0005737
	vacuolar membrane	Gene Ontology	GO:0005774
	plasma membrane	Gene Ontology	GO:0005886
	plasmodesma	Gene Ontology	GO:0009506
	cytosolic large ribosomal subunit	Gene Ontology	GO:0022625
GOslim:	structural constituent of ribosome	Gene Ontology Slim	GO:0003735
	structural molecule activity	Gene Ontology Slim	GO:0005198
	intracellular	Gene Ontology Slim	GO:0005622
	cytoplasm	Gene Ontology Slim	GO:0005737
	plasma membrane	Gene Ontology Slim	GO:0005886
////
Query:	Gene.15428::c121012.graph_c0::g.15428::m.15428
Gene:	ath:AT1G69620	RPL34
Entrez Gene ID:	843298
Pathway:	Ribosome	KEGG PATHWAY	ath03010
GO:	mRNA binding	Gene Ontology	GO:0003729
	cytoplasm	Gene Ontology	GO:0005737
	mitochondrion	Gene Ontology	GO:0005739
	vacuolar membrane	Gene Ontology	GO:0005774
	translation	Gene Ontology	GO:0006412
	large ribosomal subunit	Gene Ontology	GO:0015934
	cytosolic large ribosomal subunit	Gene Ontology	GO:0022625
	ribosome biogenesis	Gene Ontology	GO:0042254
GOslim:	RNA binding	Gene Ontology Slim	GO:0003723
	mRNA binding	Gene Ontology Slim	GO:0003729
	intracellular	Gene Ontology Slim	GO:0005622
	cytoplasm	Gene Ontology Slim	GO:0005737
	mitochondrion	Gene Ontology Slim	GO:0005739
	translation	Gene Ontology Slim	GO:0006412
	biosynthetic process	Gene Ontology Slim	GO:0009058
	cellular nitrogen compound metabolic process	Gene Ontology Slim	GO:0034641
	ribosome biogenesis	Gene Ontology Slim	GO:0042254
	organelle	Gene Ontology Slim	GO:0043226
////
Query:	Gene.15731::c121313.graph_c0::g.15731::m.15731
Gene:	ath:AT4G31985
Entrez Gene ID:	829329
Pathway:	Ribosome	KEGG PATHWAY	ath03010
GO:	mRNA binding	Gene Ontology	GO:0003729
	plasma membrane	Gene Ontology	GO:0005886
	translation	Gene Ontology	GO:0006412
	cytosolic large ribosomal subunit	Gene Ontology	GO:0022625
GOslim:	plasma membrane	Gene Ontology Slim	GO:0005886
	translation	Gene Ontology Slim	GO:0006412
	biosynthetic process	Gene Ontology Slim	GO:0009058
	cellular nitrogen compound metabolic process	Gene Ontology Slim	GO:0034641
////
Query:	Gene.18089::c123177.graph_c0::g.18089::m.18089
Gene:	ath:AT3G59540
Entrez Gene ID:	825123
Pathway:	Ribosome	KEGG PATHWAY	ath03010
GO:	cytoplasm	Gene Ontology	GO:0005737
	cytosol	Gene Ontology	GO:0005829
	translation	Gene Ontology	GO:0006412
	cytosolic large ribosomal subunit	Gene Ontology	GO:0022625
GOslim:	structural constituent of ribosome	Gene Ontology Slim	GO:0003735
	structural molecule activity	Gene Ontology Slim	GO:0005198
	intracellular	Gene Ontology Slim	GO:0005622
	cytoplasm	Gene Ontology Slim	GO:0005737
	cytosol	Gene Ontology Slim	GO:0005829
	translation	Gene Ontology Slim	GO:0006412
	biosynthetic process	Gene Ontology Slim	GO:0009058
	cellular nitrogen compound metabolic process	Gene Ontology Slim	GO:0034641
////
Query:	Gene.20679::c124972.graph_c0::g.20679::m.20679
Gene:	ath:AT3G61110	RS27A
Entrez Gene ID:	825283
Pathway:	Ribosome	KEGG PATHWAY	ath03010
GO:	ribosomal small subunit assembly	Gene Ontology	GO:0000028
	RNA binding	Gene Ontology	GO:0003723
	mRNA binding	Gene Ontology	GO:0003729
	structural constituent of ribosome	Gene Ontology	GO:0003735
	cell wall	Gene Ontology	GO:0005618
	cytoplasm	Gene Ontology	GO:0005737
	cytosol	Gene Ontology	GO:0005829
	ribosome	Gene Ontology	GO:0005840
	translation	Gene Ontology	GO:0006412
	plasmodesma	Gene Ontology	GO:0009506
	cytosolic ribosome	Gene Ontology	GO:0022626
	cytosolic small ribosomal subunit	Gene Ontology	GO:0022627
GOslim:	structural constituent of ribosome	Gene Ontology Slim	GO:0003735
	structural molecule activity	Gene Ontology Slim	GO:0005198
	cell wall	Gene Ontology Slim	GO:0005618
	intracellular	Gene Ontology Slim	GO:0005622
	cytoplasm	Gene Ontology Slim	GO:0005737
	ribosome	Gene Ontology Slim	GO:0005840
	translation	Gene Ontology Slim	GO:0006412
	biosynthetic process	Gene Ontology Slim	GO:0009058
	external encapsulating structure	Gene Ontology Slim	GO:0030312
	cellular nitrogen compound metabolic process	Gene Ontology Slim	GO:0034641
	organelle	Gene Ontology Slim	GO:0043226
////
Query:	Gene.21957::c126189.graph_c0::g.21957::m.21957
Gene:	ath:AT4G15000
Entrez Gene ID:	827159
Pathway:	Ribosome	KEGG PATHWAY	ath03010
GO:	mRNA binding	Gene Ontology	GO:0003729
	structural constituent of ribosome	Gene Ontology	GO:0003735
	cytoplasm	Gene Ontology	GO:0005737
	cytosol	Gene Ontology	GO:0005829
	ribosome	Gene Ontology	GO:0005840
	translation	Gene Ontology	GO:0006412
	cytosolic large ribosomal subunit	Gene Ontology	GO:0022625
	cytosolic ribosome	Gene Ontology	GO:0022626
GOslim:	intracellular	Gene Ontology Slim	GO:0005622
	cytoplasm	Gene Ontology Slim	GO:0005737
	cytosol	Gene Ontology Slim	GO:0005829
	translation	Gene Ontology Slim	GO:0006412
	biosynthetic process	Gene Ontology Slim	GO:0009058
	cellular nitrogen compound metabolic process	Gene Ontology Slim	GO:0034641
////
Query:	Gene.23326::c127087.graph_c0::g.23326::m.23326
Gene:	ath:AT3G05590	RPL18
Entrez Gene ID:	819725
Pathway:	Ribosome	KEGG PATHWAY	ath03010
GO:	RNA binding	Gene Ontology	GO:0003723
	mRNA binding	Gene Ontology	GO:0003729
	structural constituent of ribosome	Gene Ontology	GO:0003735
	protein binding	Gene Ontology	GO:0005515
	cytoplasm	Gene Ontology	GO:0005737
	vacuole	Gene Ontology	GO:0005773
	vacuolar membrane	Gene Ontology	GO:0005774
	Golgi apparatus	Gene Ontology	GO:0005794
	cytosol	Gene Ontology	GO:0005829
	plasma membrane	Gene Ontology	GO:0005886
	translation	Gene Ontology	GO:0006412
	chloroplast	Gene Ontology	GO:0009507
	large ribosomal subunit	Gene Ontology	GO:0015934
	cytosolic large ribosomal subunit	Gene Ontology	GO:0022625
GOslim:	structural constituent of ribosome	Gene Ontology Slim	GO:0003735
	structural molecule activity	Gene Ontology Slim	GO:0005198
	intracellular	Gene Ontology Slim	GO:0005622
	cytoplasm	Gene Ontology Slim	GO:0005737
	vacuole	Gene Ontology Slim	GO:0005773
	cytosol	Gene Ontology Slim	GO:0005829
	plasma membrane	Gene Ontology Slim	GO:0005886
	translation	Gene Ontology Slim	GO:0006412
	biosynthetic process	Gene Ontology Slim	GO:0009058
	cellular nitrogen compound metabolic process	Gene Ontology Slim	GO:0034641
	organelle	Gene Ontology Slim	GO:0043226
////
Query:	Gene.23997::c127546.graph_c0::g.23997::m.23997
Gene:	ath:AT5G04800
Entrez Gene ID:	830359
Pathway:	Ribosome	KEGG PATHWAY	ath03010
GO:	mRNA binding	Gene Ontology	GO:0003729
	structural constituent of ribosome	Gene Ontology	GO:0003735
	cytoplasm	Gene Ontology	GO:0005737
	Golgi apparatus	Gene Ontology	GO:0005794
	cytosol	Gene Ontology	GO:0005829
	plasma membrane	Gene Ontology	GO:0005886
	translation	Gene Ontology	GO:0006412
GOslim:	RNA binding	Gene Ontology Slim	GO:0003723
	mRNA binding	Gene Ontology Slim	GO:0003729
	structural constituent of ribosome	Gene Ontology Slim	GO:0003735
	structural molecule activity	Gene Ontology Slim	GO:0005198
	intracellular	Gene Ontology Slim	GO:0005622
	cytoplasm	Gene Ontology Slim	GO:0005737
	ribosome	Gene Ontology Slim	GO:0005840
	plasma membrane	Gene Ontology Slim	GO:0005886
	translation	Gene Ontology Slim	GO:0006412
	biosynthetic process	Gene Ontology Slim	GO:0009058
	cellular nitrogen compound metabolic process	Gene Ontology Slim	GO:0034641
	organelle	Gene Ontology Slim	GO:0043226
////
Query:	Gene.25382::c128434.graph_c0::g.25382::m.25382
Gene:	ath:AT4G10450
Entrez Gene ID:	826637
Pathway:	Ribosome	KEGG PATHWAY	ath03010
GO:	cytoplasmic translation	Gene Ontology	GO:0002181
	mRNA binding	Gene Ontology	GO:0003729
	structural constituent of ribosome	Gene Ontology	GO:0003735
	cytoplasm	Gene Ontology	GO:0005737
	cytosol	Gene Ontology	GO:0005829
	translation	Gene Ontology	GO:0006412
	rRNA binding	Gene Ontology	GO:0019843
	cytosolic large ribosomal subunit	Gene Ontology	GO:0022625
	cytosolic ribosome	Gene Ontology	GO:0022626
GOslim:	RNA binding	Gene Ontology Slim	GO:0003723
	structural constituent of ribosome	Gene Ontology Slim	GO:0003735
	structural molecule activity	Gene Ontology Slim	GO:0005198
	intracellular	Gene Ontology Slim	GO:0005622
	cytoplasm	Gene Ontology Slim	GO:0005737
	cytosol	Gene Ontology Slim	GO:0005829
	rRNA binding	Gene Ontology Slim	GO:0019843
////
Query:	Gene.26010::c128919.graph_c0::g.26010::m.26010
Gene:	ath:AT1G07070
Entrez Gene ID:	837218
Pathway:	Ribosome	KEGG PATHWAY	ath03010
GO:	cytoplasmic translation	Gene Ontology	GO:0002181
	mRNA binding	Gene Ontology	GO:0003729
	structural constituent of ribosome	Gene Ontology	GO:0003735
	extracellular region	Gene Ontology	GO:0005576
	cytoplasm	Gene Ontology	GO:0005737
	cytosol	Gene Ontology	GO:0005829
	cytosolic large ribosomal subunit	Gene Ontology	GO:0022625
	ribosomal large subunit biogenesis	Gene Ontology	GO:0042273
GOslim:	structural constituent of ribosome	Gene Ontology Slim	GO:0003735
	structural molecule activity	Gene Ontology Slim	GO:0005198
	extracellular region	Gene Ontology Slim	GO:0005576
	intracellular	Gene Ontology Slim	GO:0005622
	cytoplasm	Gene Ontology Slim	GO:0005737
	cytosol	Gene Ontology Slim	GO:0005829
////
Query:	Gene.26048::c128935.graph_c0::g.26048::m.26048
Gene:	ath:AT1G09590
Entrez Gene ID:	837486
Pathway:	Ribosome	KEGG PATHWAY	ath03010
GO:	structural constituent of ribosome	Gene Ontology	GO:0003735
	extracellular region	Gene Ontology	GO:0005576
	nucleolus	Gene Ontology	GO:0005730
	cytoplasm	Gene Ontology	GO:0005737
	cytosolic large ribosomal subunit	Gene Ontology	GO:0022625
	cytosolic ribosome	Gene Ontology	GO:0022626
GOslim:	structural constituent of ribosome	Gene Ontology Slim	GO:0003735
	structural molecule activity	Gene Ontology Slim	GO:0005198
	extracellular region	Gene Ontology Slim	GO:0005576
	intracellular	Gene Ontology Slim	GO:0005622
	nucleus	Gene Ontology Slim	GO:0005634
	nucleolus	Gene Ontology Slim	GO:0005730
	cytoplasm	Gene Ontology Slim	GO:0005737
	translation	Gene Ontology Slim	GO:0006412
	biosynthetic process	Gene Ontology Slim	GO:0009058
	cellular nitrogen compound metabolic process	Gene Ontology Slim	GO:0034641
	organelle	Gene Ontology Slim	GO:0043226
////
Query:	Gene.27751::c129983.graph_c0::g.27751::m.27751
Gene:	ath:AT1G74060
Entrez Gene ID:	843746
Pathway:	Ribosome	KEGG PATHWAY	ath03010
GO:	ribosomal large subunit assembly	Gene Ontology	GO:0000027
	cytoplasmic translation	Gene Ontology	GO:0002181
	RNA binding	Gene Ontology	GO:0003723
	mRNA binding	Gene Ontology	GO:0003729
	structural constituent of ribosome	Gene Ontology	GO:0003735
	nucleolus	Gene Ontology	GO:0005730
	cytoplasm	Gene Ontology	GO:0005737
	mitochondrion	Gene Ontology	GO:0005739
	cytosol	Gene Ontology	GO:0005829
	cytosolic large ribosomal subunit	Gene Ontology	GO:0022625
	cytosolic ribosome	Gene Ontology	GO:0022626
GOslim:	RNA binding	Gene Ontology Slim	GO:0003723
	mRNA binding	Gene Ontology Slim	GO:0003729
	structural constituent of ribosome	Gene Ontology Slim	GO:0003735
	structural molecule activity	Gene Ontology Slim	GO:0005198
	intracellular	Gene Ontology Slim	GO:0005622
	nucleus	Gene Ontology Slim	GO:0005634
	nucleolus	Gene Ontology Slim	GO:0005730
	cytoplasm	Gene Ontology Slim	GO:0005737
	mitochondrion	Gene Ontology Slim	GO:0005739
	organelle	Gene Ontology Slim	GO:0043226
////
Query:	Gene.29700::c131135.graph_c0::g.29700::m.29700
Gene:	ath:AT3G04400	emb2171
Entrez Gene ID:	819595
Pathway:	Ribosome	KEGG PATHWAY	ath03010
GO:	mRNA binding	Gene Ontology	GO:0003729
	structural constituent of ribosome	Gene Ontology	GO:0003735
	cytosol	Gene Ontology	GO:0005829
	translation	Gene Ontology	GO:0006412
	chloroplast	Gene Ontology	GO:0009507
	embryo development ending in seed dormancy	Gene Ontology	GO:0009793
	cytosolic large ribosomal subunit	Gene Ontology	GO:0022625
GOslim:	structural constituent of ribosome	Gene Ontology Slim	GO:0003735
	structural molecule activity	Gene Ontology Slim	GO:0005198
	extracellular region	Gene Ontology Slim	GO:0005576
	intracellular	Gene Ontology Slim	GO:0005622
	nucleus	Gene Ontology Slim	GO:0005634
	nucleolus	Gene Ontology Slim	GO:0005730
	cytoplasm	Gene Ontology Slim	GO:0005737
	endoplasmic reticulum	Gene Ontology Slim	GO:0005783
	cytosol	Gene Ontology Slim	GO:0005829
	translation	Gene Ontology Slim	GO:0006412
	biosynthetic process	Gene Ontology Slim	GO:0009058
	cellular nitrogen compound metabolic process	Gene Ontology Slim	GO:0034641
	organelle	Gene Ontology Slim	GO:0043226
////
Query:	Gene.29732::c131144.graph_c0::g.29732::m.29732
Gene:	ath:AT3G52580
Entrez Gene ID:	824424
Pathway:	Ribosome	KEGG PATHWAY	ath03010
GO:	ribosomal small subunit assembly	Gene Ontology	GO:0000028
	maturation of SSU-rRNA from tricistronic rRNA transcript (SSU-rRNA, 5.8S rRNA, LSU-rRNA)	Gene Ontology	GO:0000462
	structural constituent of ribosome	Gene Ontology	GO:0003735
	cytoplasm	Gene Ontology	GO:0005737
	cytosol	Gene Ontology	GO:0005829
	translation	Gene Ontology	GO:0006412
	cytosolic small ribosomal subunit	Gene Ontology	GO:0022627
	mRNA 5'-UTR binding	Gene Ontology	GO:0048027
	small ribosomal subunit rRNA binding	Gene Ontology	GO:0070181
GOslim:	structural constituent of ribosome	Gene Ontology Slim	GO:0003735
	structural molecule activity	Gene Ontology Slim	GO:0005198
	intracellular	Gene Ontology Slim	GO:0005622
	cytoplasm	Gene Ontology Slim	GO:0005737
	cytosol	Gene Ontology Slim	GO:0005829
	translation	Gene Ontology Slim	GO:0006412
	biosynthetic process	Gene Ontology Slim	GO:0009058
	cellular nitrogen compound metabolic process	Gene Ontology Slim	GO:0034641
////
Query:	Gene.30243::c131427.graph_c0::g.30243::m.30243
Gene:	ath:AT4G09800	RPS18C
Entrez Gene ID:	826569
Pathway:	Ribosome	KEGG PATHWAY	ath03010
GO:	mRNA binding	Gene Ontology	GO:0003729
	cell wall	Gene Ontology	GO:0005618
	nucleolus	Gene Ontology	GO:0005730
	cytoplasm	Gene Ontology	GO:0005737
	vacuole	Gene Ontology	GO:0005773
	Golgi apparatus	Gene Ontology	GO:0005794
	cytosol	Gene Ontology	GO:0005829
	translation	Gene Ontology	GO:0006412
	plasmodesma	Gene Ontology	GO:0009506
	small ribosomal subunit	Gene Ontology	GO:0015935
	cytosolic small ribosomal subunit	Gene Ontology	GO:0022627
GOslim:	RNA binding	Gene Ontology Slim	GO:0003723
	mRNA binding	Gene Ontology Slim	GO:0003729
	cell wall	Gene Ontology Slim	GO:0005618
	intracellular	Gene Ontology Slim	GO:0005622
	nucleus	Gene Ontology Slim	GO:0005634
	nucleolus	Gene Ontology Slim	GO:0005730
	cytoplasm	Gene Ontology Slim	GO:0005737
	vacuole	Gene Ontology Slim	GO:0005773
	cytosol	Gene Ontology Slim	GO:0005829
	ribosome	Gene Ontology Slim	GO:0005840
	plasma membrane	Gene Ontology Slim	GO:0005886
	translation	Gene Ontology Slim	GO:0006412
	biosynthetic process	Gene Ontology Slim	GO:0009058
	rRNA binding	Gene Ontology Slim	GO:0019843
	external encapsulating structure	Gene Ontology Slim	GO:0030312
	cellular nitrogen compound metabolic process	Gene Ontology Slim	GO:0034641
	organelle	Gene Ontology Slim	GO:0043226
////
Query:	Gene.30981::c131833.graph_c0::g.30981::m.30981
Gene:	ath:AT5G39740	RPL5B
Entrez Gene ID:	833970
Pathway:	Ribosome	KEGG PATHWAY	ath03010
GO:	ribosomal large subunit assembly	Gene Ontology	GO:0000027
	RNA binding	Gene Ontology	GO:0003723
	mRNA binding	Gene Ontology	GO:0003729
	nucleolus	Gene Ontology	GO:0005730
	cytoplasm	Gene Ontology	GO:0005737
	vacuole	Gene Ontology	GO:0005773
	Golgi apparatus	Gene Ontology	GO:0005794
	cytosol	Gene Ontology	GO:0005829
	plasma membrane	Gene Ontology	GO:0005886
	translation	Gene Ontology	GO:0006412
	5S rRNA binding	Gene Ontology	GO:0008097
	plastid	Gene Ontology	GO:0009536
	adaxial/abaxial pattern specification	Gene Ontology	GO:0009955
	leaf morphogenesis	Gene Ontology	GO:0009965
	cytosolic large ribosomal subunit	Gene Ontology	GO:0022625
	cytosolic ribosome	Gene Ontology	GO:0022626
	cell division	Gene Ontology	GO:0051301
GOslim:	intracellular	Gene Ontology Slim	GO:0005622
	nucleus	Gene Ontology Slim	GO:0005634
	nucleolus	Gene Ontology Slim	GO:0005730
	cytoplasm	Gene Ontology Slim	GO:0005737
	vacuole	Gene Ontology Slim	GO:0005773
	cytosol	Gene Ontology Slim	GO:0005829
	plasma membrane	Gene Ontology Slim	GO:0005886
	translation	Gene Ontology Slim	GO:0006412
	biosynthetic process	Gene Ontology Slim	GO:0009058
	plastid	Gene Ontology Slim	GO:0009536
	cellular nitrogen compound metabolic process	Gene Ontology Slim	GO:0034641
	organelle	Gene Ontology Slim	GO:0043226
	cell division	Gene Ontology Slim	GO:0051301
////
Query:	Gene.33608::c133232.graph_c0::g.33608::m.33608
Gene:	ath:AT4G18100
Entrez Gene ID:	827535
Pathway:	Ribosome	KEGG PATHWAY	ath03010
GO:	mRNA binding	Gene Ontology	GO:0003729
	nucleolus	Gene Ontology	GO:0005730
	cytoplasm	Gene Ontology	GO:0005737
	Golgi apparatus	Gene Ontology	GO:0005794
	cytosol	Gene Ontology	GO:0005829
	translation	Gene Ontology	GO:0006412
	cytosolic large ribosomal subunit	Gene Ontology	GO:0022625
	cytosolic ribosome	Gene Ontology	GO:0022626
GOslim:	intracellular	Gene Ontology Slim	GO:0005622
	nucleus	Gene Ontology Slim	GO:0005634
	nucleolus	Gene Ontology Slim	GO:0005730
	cytoplasm	Gene Ontology Slim	GO:0005737
	cytosol	Gene Ontology Slim	GO:0005829
	translation	Gene Ontology Slim	GO:0006412
	biosynthetic process	Gene Ontology Slim	GO:0009058
	cellular nitrogen compound metabolic process	Gene Ontology Slim	GO:0034641
	organelle	Gene Ontology Slim	GO:0043226
////
Query:	Gene.37739::c135156.graph_c0::g.37739::m.37739
Gene:	ath:AT5G09500
Entrez Gene ID:	830809
Pathway:	Ribosome	KEGG PATHWAY	ath03010
GO:	ribosomal small subunit assembly	Gene Ontology	GO:0000028
	RNA binding	Gene Ontology	GO:0003723
	structural constituent of ribosome	Gene Ontology	GO:0003735
	cytoplasm	Gene Ontology	GO:0005737
	Golgi apparatus	Gene Ontology	GO:0005794
	translation	Gene Ontology	GO:0006412
	cytosolic small ribosomal subunit	Gene Ontology	GO:0022627
GOslim:	RNA binding	Gene Ontology Slim	GO:0003723
	structural constituent of ribosome	Gene Ontology Slim	GO:0003735
	structural molecule activity	Gene Ontology Slim	GO:0005198
	intracellular	Gene Ontology Slim	GO:0005622
	cytoplasm	Gene Ontology Slim	GO:0005737
	translation	Gene Ontology Slim	GO:0006412
	biosynthetic process	Gene Ontology Slim	GO:0009058
	cellular nitrogen compound metabolic process	Gene Ontology Slim	GO:0034641
////
Query:	Gene.40620::c136439.graph_c0::g.40620::m.40620
Gene:	ath:AT2G19740
Entrez Gene ID:	816493
Pathway:	Ribosome	KEGG PATHWAY	ath03010
GO:	cytoplasmic translation	Gene Ontology	GO:0002181
	mRNA binding	Gene Ontology	GO:0003729
	structural constituent of ribosome	Gene Ontology	GO:0003735
	cytoplasm	Gene Ontology	GO:0005737
	plasma membrane	Gene Ontology	GO:0005886
	chloroplast	Gene Ontology	GO:0009507
	cytosolic large ribosomal subunit	Gene Ontology	GO:0022625
	cytosolic ribosome	Gene Ontology	GO:0022626
GOslim:	structural constituent of ribosome	Gene Ontology Slim	GO:0003735
	structural molecule activity	Gene Ontology Slim	GO:0005198
	intracellular	Gene Ontology Slim	GO:0005622
	cytoplasm	Gene Ontology Slim	GO:0005737
	plasma membrane	Gene Ontology Slim	GO:0005886
////
Query:	Gene.41785::c136919.graph_c0::g.41785::m.41785
Gene:	ath:AT1G67430
Entrez Gene ID:	843063
Pathway:	Ribosome	KEGG PATHWAY	ath03010
GO:	cytoplasmic translation	Gene Ontology	GO:0002181
	mRNA binding	Gene Ontology	GO:0003729
	structural constituent of ribosome	Gene Ontology	GO:0003735
	nucleolus	Gene Ontology	GO:0005730
	cytoplasm	Gene Ontology	GO:0005737
	mitochondrion	Gene Ontology	GO:0005739
	vacuole	Gene Ontology	GO:0005773
	Golgi apparatus	Gene Ontology	GO:0005794
	cytosol	Gene Ontology	GO:0005829
	translation	Gene Ontology	GO:0006412
	plasmodesma	Gene Ontology	GO:0009506
	large ribosomal subunit	Gene Ontology	GO:0015934
	cytosolic large ribosomal subunit	Gene Ontology	GO:0022625
	cytosolic ribosome	Gene Ontology	GO:0022626
GOslim:	intracellular	Gene Ontology Slim	GO:0005622
	nucleus	Gene Ontology Slim	GO:0005634
	nucleolus	Gene Ontology Slim	GO:0005730
	cytoplasm	Gene Ontology Slim	GO:0005737
	mitochondrion	Gene Ontology Slim	GO:0005739
	vacuole	Gene Ontology Slim	GO:0005773
	organelle	Gene Ontology Slim	GO:0043226
////
Query:	Gene.42430::c137152.graph_c0::g.42430::m.42430
Gene:	ath:AT2G01250
Entrez Gene ID:	814652
Pathway:	Ribosome	KEGG PATHWAY	ath03010
GOslim:	RNA binding	Gene Ontology Slim	GO:0003723
	mRNA binding	Gene Ontology Slim	GO:0003729
	cell wall	Gene Ontology Slim	GO:0005618
	intracellular	Gene Ontology Slim	GO:0005622
	cytoplasm	Gene Ontology Slim	GO:0005737
	mitochondrion	Gene Ontology Slim	GO:0005739
	vacuole	Gene Ontology Slim	GO:0005773
	cytosol	Gene Ontology Slim	GO:0005829
	plasma membrane	Gene Ontology Slim	GO:0005886
	external encapsulating structure	Gene Ontology Slim	GO:0030312
	organelle	Gene Ontology Slim	GO:0043226
////
Query:	Gene.43508::c137597.graph_c0::g.43508::m.43508
Gene:	ath:AT1G48830
Entrez Gene ID:	841305
Pathway:	Ribosome	KEGG PATHWAY	ath03010
GO:	mRNA binding	Gene Ontology	GO:0003729
	cell wall	Gene Ontology	GO:0005618
	nucleus	Gene Ontology	GO:0005634
	cytosol	Gene Ontology	GO:0005829
	plasma membrane	Gene Ontology	GO:0005886
	rRNA processing	Gene Ontology	GO:0006364
	translation	Gene Ontology	GO:0006412
	cytosolic ribosome	Gene Ontology	GO:0022626
	cytosolic small ribosomal subunit	Gene Ontology	GO:0022627
	small-subunit processome	Gene Ontology	GO:0032040
	ribosomal small subunit biogenesis	Gene Ontology	GO:0042274
GOslim:	RNA binding	Gene Ontology Slim	GO:0003723
	mRNA binding	Gene Ontology Slim	GO:0003729
	cell wall	Gene Ontology Slim	GO:0005618
	intracellular	Gene Ontology Slim	GO:0005622
	nucleus	Gene Ontology Slim	GO:0005634
	cytoplasm	Gene Ontology Slim	GO:0005737
	cytosol	Gene Ontology Slim	GO:0005829
	plasma membrane	Gene Ontology Slim	GO:0005886
	translation	Gene Ontology Slim	GO:0006412
	biosynthetic process	Gene Ontology Slim	GO:0009058
	external encapsulating structure	Gene Ontology Slim	GO:0030312
	cellular nitrogen compound metabolic process	Gene Ontology Slim	GO:0034641
	organelle	Gene Ontology Slim	GO:0043226
////
Query:	Gene.45404::c138346.graph_c0::g.45404::m.45404
Gene:	ath:AT2G18020	EMB2296
Entrez Gene ID:	816314
Pathway:	Ribosome	KEGG PATHWAY	ath03010
GO:	cytoplasmic translation	Gene Ontology	GO:0002181
	RNA binding	Gene Ontology	GO:0003723
	mRNA binding	Gene Ontology	GO:0003729
	structural constituent of ribosome	Gene Ontology	GO:0003735
	protein binding	Gene Ontology	GO:0005515
	nucleolus	Gene Ontology	GO:0005730
	cytoplasm	Gene Ontology	GO:0005737
	mitochondrion	Gene Ontology	GO:0005739
	vacuole	Gene Ontology	GO:0005773
	vacuolar membrane	Gene Ontology	GO:0005774
	Golgi apparatus	Gene Ontology	GO:0005794
	cytosol	Gene Ontology	GO:0005829
	plasma membrane	Gene Ontology	GO:0005886
	embryo development ending in seed dormancy	Gene Ontology	GO:0009793
	cytosolic large ribosomal subunit	Gene Ontology	GO:0022625
	cytosolic ribosome	Gene Ontology	GO:0022626
GOslim:	RNA binding	Gene Ontology Slim	GO:0003723
	mRNA binding	Gene Ontology Slim	GO:0003729
	structural constituent of ribosome	Gene Ontology Slim	GO:0003735
	structural molecule activity	Gene Ontology Slim	GO:0005198
	intracellular	Gene Ontology Slim	GO:0005622
	nucleus	Gene Ontology Slim	GO:0005634
	nucleolus	Gene Ontology Slim	GO:0005730
	cytoplasm	Gene Ontology Slim	GO:0005737
	mitochondrion	Gene Ontology Slim	GO:0005739
	vacuole	Gene Ontology Slim	GO:0005773
	cytosol	Gene Ontology Slim	GO:0005829
	plasma membrane	Gene Ontology Slim	GO:0005886
	organelle	Gene Ontology Slim	GO:0043226
////
Query:	Gene.50291::c140080.graph_c0::g.50291::m.50291
Gene:	ath:AT2G37270	RPS5B
Entrez Gene ID:	818304
Pathway:	Ribosome	KEGG PATHWAY	ath03010
GO:	ribosomal small subunit assembly	Gene Ontology	GO:0000028
	mRNA binding	Gene Ontology	GO:0003729
	structural constituent of ribosome	Gene Ontology	GO:0003735
	cell wall	Gene Ontology	GO:0005618
	cytoplasm	Gene Ontology	GO:0005737
	vacuolar membrane	Gene Ontology	GO:0005774
	endoplasmic reticulum	Gene Ontology	GO:0005783
	cytosol	Gene Ontology	GO:0005829
	ribosome	Gene Ontology	GO:0005840
	plasma membrane	Gene Ontology	GO:0005886
	translation	Gene Ontology	GO:0006412
	plasmodesma	Gene Ontology	GO:0009506
	chloroplast	Gene Ontology	GO:0009507
	rRNA binding	Gene Ontology	GO:0019843
	cytosolic ribosome	Gene Ontology	GO:0022626
	cytosolic small ribosomal subunit	Gene Ontology	GO:0022627
GOslim:	RNA binding	Gene Ontology Slim	GO:0003723
	mRNA binding	Gene Ontology Slim	GO:0003729
	structural constituent of ribosome	Gene Ontology Slim	GO:0003735
	structural molecule activity	Gene Ontology Slim	GO:0005198
	cell wall	Gene Ontology Slim	GO:0005618
	intracellular	Gene Ontology Slim	GO:0005622
	cytoplasm	Gene Ontology Slim	GO:0005737
	endoplasmic reticulum	Gene Ontology Slim	GO:0005783
	cytosol	Gene Ontology Slim	GO:0005829
	plasma membrane	Gene Ontology Slim	GO:0005886
	translation	Gene Ontology Slim	GO:0006412
	biosynthetic process	Gene Ontology Slim	GO:0009058
	rRNA binding	Gene Ontology Slim	GO:0019843
	external encapsulating structure	Gene Ontology Slim	GO:0030312
	cellular nitrogen compound metabolic process	Gene Ontology Slim	GO:0034641
	organelle	Gene Ontology Slim	GO:0043226
////
Query:	Gene.51318::c140404.graph_c1::g.51318::m.51318
Gene:	ath:AT2G40010
Entrez Gene ID:	818589
Pathway:	Ribosome	KEGG PATHWAY	ath03010
GO:	ribosomal large subunit assembly	Gene Ontology	GO:0000027
	cytoplasmic translation	Gene Ontology	GO:0002181
	mRNA binding	Gene Ontology	GO:0003729
	structural constituent of ribosome	Gene Ontology	GO:0003735
	protein binding	Gene Ontology	GO:0005515
	cytoplasm	Gene Ontology	GO:0005737
	Golgi apparatus	Gene Ontology	GO:0005794
	cytosolic large ribosomal subunit	Gene Ontology	GO:0022625
	cytosolic ribosome	Gene Ontology	GO:0022626
	large ribosomal subunit rRNA binding	Gene Ontology	GO:0070180
GOslim:	structural constituent of ribosome	Gene Ontology Slim	GO:0003735
	structural molecule activity	Gene Ontology Slim	GO:0005198
	intracellular	Gene Ontology Slim	GO:0005622
	cytoplasm	Gene Ontology Slim	GO:0005737
	Golgi apparatus	Gene Ontology Slim	GO:0005794
	organelle	Gene Ontology Slim	GO:0043226
////
Query:	Gene.56007::c141869.graph_c0::g.56007::m.56007
Gene:	ath:AT1G61580	RPL3B
Entrez Gene ID:	842454
Pathway:	Ribosome	KEGG PATHWAY	ath03010
GO:	ribosomal large subunit assembly	Gene Ontology	GO:0000027
	RNA binding	Gene Ontology	GO:0003723
	structural constituent of ribosome	Gene Ontology	GO:0003735
	nucleus	Gene Ontology	GO:0005634
	cytoplasm	Gene Ontology	GO:0005737
	translation	Gene Ontology	GO:0006412
	cytosolic large ribosomal subunit	Gene Ontology	GO:0022625
GOslim:	structural constituent of ribosome	Gene Ontology Slim	GO:0003735
	structural molecule activity	Gene Ontology Slim	GO:0005198
	intracellular	Gene Ontology Slim	GO:0005622
	nucleus	Gene Ontology Slim	GO:0005634
	cytoplasm	Gene Ontology Slim	GO:0005737
	translation	Gene Ontology Slim	GO:0006412
	biosynthetic process	Gene Ontology Slim	GO:0009058
	cellular nitrogen compound metabolic process	Gene Ontology Slim	GO:0034641
	organelle	Gene Ontology Slim	GO:0043226
////
Query:	Gene.60310::c143067.graph_c0::g.60310::m.60310
Gene:	ath:AT2G27530	PGY1
Entrez Gene ID:	817299
Pathway:	Ribosome	KEGG PATHWAY	ath03010
GO:	maturation of LSU-rRNA	Gene Ontology	GO:0000470
	RNA binding	Gene Ontology	GO:0003723
	cytoplasm	Gene Ontology	GO:0005737
	peroxisome	Gene Ontology	GO:0005777
	cytosol	Gene Ontology	GO:0005829
	translation	Gene Ontology	GO:0006412
	adaxial/abaxial pattern specification	Gene Ontology	GO:0009955
	cytosolic large ribosomal subunit	Gene Ontology	GO:0022625
	cytosolic ribosome	Gene Ontology	GO:0022626
	post-embryonic plant organ development	Gene Ontology	GO:0090696
GOslim:	RNA binding	Gene Ontology Slim	GO:0003723
	intracellular	Gene Ontology Slim	GO:0005622
	cytoplasm	Gene Ontology Slim	GO:0005737
	peroxisome	Gene Ontology Slim	GO:0005777
	cytosol	Gene Ontology Slim	GO:0005829
	translation	Gene Ontology Slim	GO:0006412
	biosynthetic process	Gene Ontology Slim	GO:0009058
	cellular nitrogen compound metabolic process	Gene Ontology Slim	GO:0034641
	organelle	Gene Ontology Slim	GO:0043226
////
Query:	Gene.74479::c146570.graph_c0::g.74479::m.74479
Gene:	ath:AT4G16720
Entrez Gene ID:	827375
Pathway:	Ribosome	KEGG PATHWAY	ath03010
GO:	cytoplasmic translation	Gene Ontology	GO:0002181
	RNA binding	Gene Ontology	GO:0003723
	mRNA binding	Gene Ontology	GO:0003729
	structural constituent of ribosome	Gene Ontology	GO:0003735
	cytoplasm	Gene Ontology	GO:0005737
	vacuolar membrane	Gene Ontology	GO:0005774
	Golgi apparatus	Gene Ontology	GO:0005794
	cytosol	Gene Ontology	GO:0005829
	plasma membrane	Gene Ontology	GO:0005886
	cytosolic large ribosomal subunit	Gene Ontology	GO:0022625
	cytosolic ribosome	Gene Ontology	GO:0022626
GOslim:	RNA binding	Gene Ontology Slim	GO:0003723
	structural constituent of ribosome	Gene Ontology Slim	GO:0003735
	structural molecule activity	Gene Ontology Slim	GO:0005198
	intracellular	Gene Ontology Slim	GO:0005622
	cytoplasm	Gene Ontology Slim	GO:0005737
	cytosol	Gene Ontology Slim	GO:0005829
	plasma membrane	Gene Ontology Slim	GO:0005886
////
Query:	Gene.108026::c152852.graph_c1::g.108026::m.108026
Gene:	ath:AT3G07110
Entrez Gene ID:	819897
Pathway:	Ribosome	KEGG PATHWAY	ath03010
GO:	mRNA binding	Gene Ontology	GO:0003729
	nucleolus	Gene Ontology	GO:0005730
	cytoplasm	Gene Ontology	GO:0005737
	cytosol	Gene Ontology	GO:0005829
	translation	Gene Ontology	GO:0006412
	plasmodesma	Gene Ontology	GO:0009506
	cytosolic large ribosomal subunit	Gene Ontology	GO:0022625
	cytosolic ribosome	Gene Ontology	GO:0022626
////
Query:	Gene.156900::c41647.graph_c0::g.156900::m.156900
Gene:	ath:AT3G02080
Entrez Gene ID:	821120
Pathway:	Ribosome	KEGG PATHWAY	ath03010
GO:	ribosomal small subunit assembly	Gene Ontology	GO:0000028
	RNA binding	Gene Ontology	GO:0003723
	mRNA binding	Gene Ontology	GO:0003729
	structural constituent of ribosome	Gene Ontology	GO:0003735
	cell wall	Gene Ontology	GO:0005618
	nucleus	Gene Ontology	GO:0005634
	cytosol	Gene Ontology	GO:0005829
	translation	Gene Ontology	GO:0006412
	plasmodesma	Gene Ontology	GO:0009506
	cytosolic ribosome	Gene Ontology	GO:0022626
	cytosolic small ribosomal subunit	Gene Ontology	GO:0022627
GOslim:	structural constituent of ribosome	Gene Ontology Slim	GO:0003735
	structural molecule activity	Gene Ontology Slim	GO:0005198
	cell wall	Gene Ontology Slim	GO:0005618
	intracellular	Gene Ontology Slim	GO:0005622
[truncated: 36 more rows]

## Sheet: proteome
ath03010 Ribosome	3.8423e-31	c17271_f2p0_736	40S ribosomal protein S16-like
ath03010 Ribosome	3.8423e-31	c21170_f1p1_1076	40S ribosomal protein S13-like
ath03010 Ribosome	3.8423e-31	c26982_f1p21_1112	60S ribosomal protein L7a-1-like
ath03010 Ribosome	3.8423e-31	c63198.1_c0_orf1	40S ribosomal protein S26-1
ath03010 Ribosome	3.8423e-31	c34195_f1p3_1333	ribosomal protein S8 (plastid)
ath03010 Ribosome	3.8423e-31	c1786_f7p1_871	60S ribosomal protein L18-2
ath03010 Ribosome	3.8423e-31	c35197_f1p2_1028	40S ribosomal protein S7
ath03010 Ribosome	3.8423e-31	c15782_f1p0_960	40S ribosomal protein S6
ath03010 Ribosome	3.8423e-31	c14167_f2p0_1016	"50S ribosomal protein L15, chloroplastic"
ath03010 Ribosome	3.8423e-31	c148751.2_c0_orf2	40S ribosomal protein S15
ath03010 Ribosome	3.8423e-31	c134266.2_c0_orf1	"30S ribosomal protein S20, chloroplastic-like"
ath03010 Ribosome	3.8423e-31	c5950_f2p3_1519	60S ribosomal protein L4
ath03010 Ribosome	3.8423e-31	c1243_f3p1_905	"50S ribosomal protein L19-1, chloroplastic-like isoform X1"
ath03010 Ribosome	3.8423e-31	c8524_f1p0_870	60S ribosomal protein L15-like
ath03010 Ribosome	3.8423e-31	c152216.2_c0_orf2	60S ribosomal protein L36-2-like
ath03010 Ribosome	3.8423e-31	c58905.1_c0_orf1	"30S ribosomal protein S9, chloroplastic-like"
ath03010 Ribosome	3.8423e-31	c26367_f1p1_632	60S ribosomal protein L27-3
ath03010 Ribosome	3.8423e-31	c16401_f1p4_4386	30S ribosomal protein S3 (chloroplast)
ath03010 Ribosome	3.8423e-31	c24485_f2p1_903	60S ribosomal protein L13a-4
ath03010 Ribosome	3.8423e-31	c135834.2_c1_orf1	ubiquitin-40S ribosomal protein S27a
ath03010 Ribosome	3.8423e-31	c138773.2_c1_orf1	60S ribosomal protein L34-like
ath03010 Ribosome	3.8423e-31	c36780_f1p0_647	60S ribosomal protein L21-1
ath03010 Ribosome	3.8423e-31	c44049_f8p12_1020	60S ribosomal protein L7-2-like
ath03010 Ribosome	3.8423e-31	c29089_f1p0_826	60S ribosomal protein L18a
ath03010 Ribosome	3.8423e-31	c13952_f2p1_1076	"50S ribosomal protein L3, chloroplastic"
ath03010 Ribosome	3.8423e-31	c14073_f3p3_1077	40S ribosomal protein S2-4
ath03010 Ribosome	3.8423e-31	c5909_f4p3_787	60S ribosomal protein L17-2
ath03010 Ribosome	3.8423e-31	c26714_f2p1_1031	60S ribosomal protein L13-1-like
ath03010 Ribosome	3.8423e-31	c127010.2_c1_orf1	60S ribosomal protein L26-1-like
ath03010 Ribosome	3.8423e-31	c74584.1_c1_orf5	"50S ribosomal protein L27, chloroplastic"
ath03010 Ribosome	3.8423e-31	c2062_f12p15_1059	60S ribosomal protein L19-1-like
ath03010 Ribosome	3.8423e-31	c6081_f1p0_2644	60S ribosomal protein L38 isoform X1
ath03010 Ribosome	3.8423e-31	c75120.1_c0_orf12	50S ribosomal protein L16 (chloroplast)
ath03010 Ribosome	3.8423e-31	c122404.2_c1_orf1	"50S ribosomal protein L31, chloroplastic"
ath03010 Ribosome	3.8423e-31	c27026_f1p1_1056	60S ribosomal protein L13a-4
ath03010 Ribosome	3.8423e-31	c38225_f1p0_724	40S ribosomal protein S15a-1-like
ath03010 Ribosome	3.8423e-31	c35580_f1p0_898	60S ribosomal protein L23a
ath03010 Ribosome	3.8423e-31	c13241_f1p5_1188	50S ribosomal protein L2 (chloroplast)
ath03010 Ribosome	3.8423e-31	c12259_f1p0_819	40S ribosomal protein S11-like
ath03010 Ribosome	3.8423e-31	c26433_f1p3_1512	30S ribosomal protein S7 (chloroplast)
ath03010 Ribosome	3.8423e-31	c32906_f1p0_798	40S ribosomal protein S18
ath03010 Ribosome	3.8423e-31	c59574.1_c0_orf1	"50S ribosomal protein L5, chloroplastic"
ath03010 Ribosome	3.8423e-31	c76600.1_c0_orf1	"30S ribosomal protein S17, chloroplastic"
ath03010 Ribosome	3.8423e-31	c66211.1_c0_orf1	"50S ribosomal protein L6, chloroplastic"
ath03010 Ribosome	3.8423e-31	c34265_f1p0_668	40S ribosomal protein S9-2-like
ath03010 Ribosome	3.8423e-31	c51354.1_c0_orf1	60S ribosomal protein L28-2-like
ath03010 Ribosome	3.8423e-31	c18058_f3p4_927	60S ribosomal protein L19-1-like
ath03010 Ribosome	3.8423e-31	c31078_f1p0_1438	ribosomal protein S11 (plastid)
ath03010 Ribosome	3.8423e-31	c44166_f18p5_938	60S ribosomal protein L10
ath03010 Ribosome	3.8423e-31	c39121_f1p0_975	40S ribosomal protein S10-1-like
ath03010 Ribosome	3.8423e-31	c8406_f1p1_802	40S ribosomal protein S10-1-like
ath03010 Ribosome	3.8423e-31	c15911_f1p1_1349	40S ribosomal protein S14-3
ath03010 Ribosome	3.8423e-31	c145487.2_c0_orf1	"50S ribosomal protein L12, chloroplastic"
ath03010 Ribosome	3.8423e-31	c7696_f6p16_1198	40S ribosomal protein S6-like
ath03010 Ribosome	3.8423e-31	c75116.1_c0_orf7	ribosomal protein S12 (chloroplast)
