# Supplementary material for: Multi-Approach Analysis Reveals Pathways of Cold Tolerance Divergence in Camellia japonica
Source: Front Plant Sci. 2022 Feb 25;13:811791. doi: 10.3389/fpls.2022.811791 (PMC8914472; doi:10.3389/fpls.2022.811791)
Supplement: Supplementary Table 12 — The raw data of plant hormone measurement. [file Table_12.XLSX]

## Sheet: Sheet1
ABA	Sg C. japonica										Tg C. japonica
control	116.236	119.785	119.232	108.441	109.449	105.96	110.467	105.96	105.96		104.499	108.692	107.94	97.491	100.236	97.2656	100.468	102.345	101.402
4h	80.6416	82.1483	79.8987	88.667	91.1635	87.2423	86.4386	87.8501	89.0783		73.8536	71.3341	74.0247	67.6369	68.9007	67.0138	69.7025	71.4994	69.5414
8h	87.2423	89.6988	88.462	91.3747	88.8724	87.2423	86.4386	83.4898	80.8285		82.1483	79.346	79.1626	86.2388	82.3387	85.0497	87.647	86.2388	90.1149
24h	89.9066	90.9528	89.2846	94.1652	95.0408	93.082	87.4444	88.8724	86.4386		70.6769	73.8536	70.6769	72.667	73.8536	71.8311	74.3681	71.1693	73.3427
IAA	Sg C. japonica										Tg C. japonica
control	26.8828	27.2294	26.4276	26.8255	27.0555	26.0912	27.4043	28.9685	29.5304		58.3494	55.435	56.2696	54.38	54.9636	53.6879	51.5538	48.4588	46.1368
4h	65.7593	68.9215	64.7839	73.7945	72.0818	76.6855	71.4688	74.1103	73.1671		20.4986	19.3092	20.1946	18.15	17.4657	18.1888	15.7646	16.1048	16.9877
8h	91.9438	88.8562	91.552	94.3297	97.1916	91.7477	84.9605	82.2829	79.86		17.5405	17.0604	17.2067	17.5031	17.919	17.9573	19.268	20.4113	19.3918
24h	50.0357	51.7743	49.0835	36.1702	35.8626	36.0161	40.938	39.5632	42.0901		42.18	41.5544	39.9025	34.9556	34.6583	36.7148	29.3419	28.7221	28.2961
GA3	Sg C. japonica										Tg C. japonica
control	7.94947	8.12402	8.32246	7.43007	7.57491	7.13141	8.46424	8.46424	8.40318		7.32326	7.13141	7.21799	6.84477	7.27043	7.21799	7.14865	7.30561	7.70395
4h	8.18305	7.75993	7.43007	8.16333	8.12402	8.42349	8.14365	8.04598	7.96868		6.63337	6.96138	7.27043	6.19995	5.9364	6.19995	6.32081	6.42849	6.12559
8h	7.9112	7.79747	7.81631	8.36272	8.10444	8.58769	8.26242	8.36272	8.28239		6.87788	7.30561	7.13141	6.60143	6.63337	6.38212	7.09708	7.48405	7.53843
24h	6.11082	6.26009	5.96512	6.66546	6.92786	6.74637	6.50653	6.27521	5.92209		5.97953	6.05212	6.18501	5.56193	5.85106	5.8652	6.22995	5.92209	5.89358
GA4	Sg C. japonica										Tg C. japonica
control	12.4628	12.8452	13.0688	13.528	12.9845	12.9286	11.4321	10.9255	11.0679		4.77008	4.87415	5.11115	5.13326	5.20017	4.98048	5.31361	5.08914	4.96975
4h	7.73531	7.6029	7.83612	8.46922	8.12896	8.0765	8.00708	8.04171	8.39642		7.17253	7.36071	7.12624	6.60778	6.63636	6.32864	7.50508	7.81923	8.16412
8h	8.04171	7.71863	7.80237	8.59814	8.93872	8.8047	8.32425	8.72902	8.8047		4.33796	4.56857	4.72908	4.05723	4.25451	4.2914	4.53909	4.7393	4.78039
24h	10.2185	10.6004	10.855	10.0653	10.4866	9.95726	9.11404	9.43426	9.85039		6.92909	7.25035	7.61932	7.32901	7.50508	7.83612	7.5213	7.57015	7.65228
ZR	Sg C. japonica										Tg C. japonica
control	11.1051	11.3898	11.4952	10.8524	10.5324	10.7035	11.899	12.5749	13.1371		8.17642	8.48317	8.38609	8.10148	8.08285	7.86264	7.57833	7.64843	7.84456
4h	12.662	13.1673	12.4884	13.8195	13.9794	13.5361	13.5361	14.044	13.5361		5.70969	5.80243	5.7625	5.10067	5.20745	5.51591	5.34098	5.55413	5.63137
8h	8.23308	8.38609	8.04573	7.68372	7.63084	8.02723	8.29013	8.10148	7.71918		6.14614	6.4803	6.11791	6.34743	6.26036	6.39141	6.77	6.78561	6.54024
24h	10.6544	11.1051	11.5749	11.1563	10.5567	11.182	10.1516	10.6298	10.388		9.60597	9.47421	9.25862	9.23733	8.78119	8.72076	8.86242	9.25862	8.74086
BR	Sg C. japonica										Tg C. japonica
control	7.14519	6.91634	6.91634	6.71041	6.67928	6.42041	7.22874	7.31327	7.3303		5.49422	5.64968	5.67601	5.13596	5.0766	4.93691	5.38044	5.28128	5.40552
4h	4.95992	4.74557	4.81224	4.87985	5.10026	5.13596	4.59358	4.6365	4.70164		5.55847	5.40552	5.58438	5.10026	5.31825	5.19602	5.33063	5.20812	5.01792
8h	4.52994	4.37467	4.49845	5.08842	4.97147	4.86851	4.81224	4.76769	4.64729		5.51983	5.33063	5.1599	5.66283	5.54556	5.45603	5.28128	5.05304	4.97147
24h	5.0766	5.3059	5.3059	4.69072	4.60427	4.41555	4.98304	4.93691	4.89121		4.46718	4.60427	4.58291	4.34426	4.2642	4.29405	4.64729	4.55105	4.64729
