# Supplementary material for: Multi-Approach Analysis Reveals Pathways of Cold Tolerance Divergence in Camellia japonica
Source: Front Plant Sci. 2022 Feb 25;13:811791. doi: 10.3389/fpls.2022.811791 (PMC8914472; doi:10.3389/fpls.2022.811791)
Supplement: Supplementary Table 13 — The temperature of Qingdao and Zhoushan. [file Table_13.XLSX]

## Sheet: Sheet1
Qingdao	Daily maximum temperature	Daily minimum temperature	Historical highest temperature	Historical lowest temperature
January	4	-2	10	-14
February	5	-1	11	-9
March	10	4	23	-3
April	16	10	27	2
May	22	15	32	9
June	25	20	31	15
July	29	24	33	19
August	30	25	34	17
September	27	20	30	13
October	20	14	26	0
November	13	7	19	-4
December	6	0	15	-10
Zhoushan	Daily maximum temperature	Daily minimum temperature	Historical highest temperature	Historical lowest temperature
January	10	4	20	-6
February	11	4	22	-4
March	15	7	26	1
April	20	12	28	3
May	25	18	32	9
June	28	22	35	16
July	33	26	38	19
August	33	26	39	21
September	29	23	34	17
October	25	18	30	0
November	19	12	26	0
December	12	6	22	-3
