# Supplementary material for: Multi-Approach Analysis Reveals Pathways of Cold Tolerance Divergence in Camellia japonica
Source: Front Plant Sci. 2022 Feb 25;13:811791. doi: 10.3389/fpls.2022.811791 (PMC8914472; doi:10.3389/fpls.2022.811791)
Supplement: Supplementary Table 14 — The primer and RAW data of RT-qPCR. [file Table_14.XLSX]

## Sheet: primer
primer
c153759-F	GTTGAGCTGCCCTATTCTTGTACG
c153759-R	ATGACACAATCTTGAGTTGGGTATGAA
c148557-F	CGACGGGAACAAGAGTAACAATGC
C148557-R	TGATGGATTCGCCTTCTGAAACAA
C146541-F	CAAGACCCAGTTCAGATTCGTGATG
C146541-R	TGCCTGTCGTTCCCTATTGTAAGC
C143865-F	ATTTCGGGCTTGACTTTGCTGTG
C143865-R	TGTCATCCTTCTTGAGTAATTCCCATA
C129109-F	ACAAATACGGTGCTAATGTCGATGG
C129109-R	AGCACTTGTACTGTAAACGAGGAGGG
C122766-F	AGGTACTGGCCGATGTGGAAGC
C122766-R	TGCCACCAGACTCCTCGCAA
C117808-F	ATCGACATTGTCATCTAGGGTACCG
C117808-R	GACACCGAGGACGTAGGTAGGG
C105617-F	ATGAGCCTATCCTCTCTTCTCTGGT
C105617-R	AAGTAAGAAGAATTTTTTGGATTTGAAG
NADPH-F	GGGAATCCTTGGTTACACTGAG
NADPH-R	ACCCCATTCGTTGTCATACC

## Sheet: RAW data
	Tg-CK	Tg-4h	Tg-8h	Tg-24h	Sg-CK	Sg-4h	Sg-8h	Sg-24h
143-1	24.3176	22.5257	23.8329	23.5039	24.2523	37.9151	23.3638	24.9982
143-2	24.6803	23.5457	23.5782	24.0133	24.2444	37.1587	25.8066	25.0489
143-3	24.3411	22.702	23.4984	23.598	24.3094	38.3859	23.0931	25.0359
105-1	26.1674	29.6208	31.7699	32.8059	31.3582	25.0944	26.3128	26.5621
105-2	26.4825	22.4077	25.6608	26.3732	23.9302	25.2238	26.1979	26.6748
105-3	26.3956	22.9738	26.3016	27.9165	24.4096	32.5246	26.5862	26.801
148-1	27.765	19.6723	21.0465	19.4635	20.3778	20.5351	20.1623	22.8916
148-2	19.3949	18.7934	20.7935	19.2871	20.1333	20.4147	20.0397	23.2634
148-3	20.6007	19.7271	21.3591	20.5829	20.7259	21.0697	20.2895	23.5775
146-1	32.4175	25.9132	26.8585	27.5345	27.3541	27.133	27.754	31.9004
146-2	27.2489	27.3814	26.626	27.5407	26.8833	27.3602	28.3871	30.8633
146-3	26.4677	33.6045	28.2706	27.8279	26.9735	27.4679	28.431	30.2597
129-1	21.0963	20.154	20.1978	22.4202	21.0212	21.9921	21.5553	25.639
129-2	21.9815	20.3659	20.9751	22.9914	21.1495	20.8137	21.5409	23.8164
129-3	21.0717	20.1589	20.673	22.5922	21.1987	21.3338	21.3864	23.0194
